# Supplementary material for: Strained alkynes derived from 2,2′-dihydroxy-1,1′-biaryls; synthesis and copper-free cycloaddition with azides
Source: Royal Society of Chemistry journal article supplement (doi:10.1039/c7ob00991g), 2017-01-01

**Strained Alkynes Derived from 2,2'-Dihydroxy-1,1'-Biaryls; Synthesis and Copper-Free Cycloaddition with Azides.**

Alessandro Del Grosso, Lavrentis-Dimitrios Galanopoulos, Cookson K. C. Chiu, Guy J. Clarkson, Peter B. O'Connor and Martin Wills\*

Department of Chemistry, The University of Warwick, Coventry, CV4 7AL, UK.  
m.wills@warwick.ac.uk.

**Supporting information:**

|                                                                                                        |             |
|--------------------------------------------------------------------------------------------------------|-------------|
| <b>Synthetic procedures and NMR spectra</b>                                                            | <b>S2</b>   |
| <b>Reactions of activated ester 14 with peptide and proteins, followed by addition of benzyl azide</b> | <b>S68</b>  |
| <b>X-ray structures</b>                                                                                | <b>S89</b>  |
| <b>Kinetic data</b>                                                                                    | <b>S111</b> |

## Synthetic procedures and NMR spectra.

### General experimental.

Solvents and reagents for the synthesis of complexes and catalytic reactions were degassed prior to use and all reactions were carried out under either a nitrogen or argon atmosphere. Reactions were monitored by TLC using aluminum backed silica gel 60 (F254) plates, visualized using UV 254 nm and phosphomolybdic acid, potassium permanganate or vanillin dips as appropriate. Flash column chromatography was carried out routinely on silica gel. Reagents were used as received from commercial sources unless otherwise stated. Dry solvents were purchased and used as received.  $^1\text{H}$  NMR spectra were recorded on a Bruker DPX (400 or 500 MHz) spectrometer. Chemical shifts are reported in  $\delta$  units, parts per million relative to the singlet at 7.26 ppm for chloroform and 0.00 ppm for TMS. Mass spectra for analysis of synthetic products were recorded on a Bruker Esquire2000 or a Bruker MicroTOF mass spectrometer. FTICR Mass Spectrometry to measure the binding to peptides and proteins was carried using a Bruker Solarix 12T, Bruker Daltonics (Bremen, Germany) instrument. Coupling constants (J) are measured in Hertz. IR spectra were recorded on a Perkin-Elmer Spectrum One FT-IR Golden Gate. Melting points were recorded on a Stuart Scientific SMP 1 instrument and are uncorrected.

**Synthesis of compound 1;** 8,13-dioxatricyclo[12.4.0.0<sup>2,7</sup>]octadeca-1(14),2,4,6,15,17-hexaen-10-yne **1**.

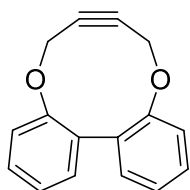

This is a known compound (U. Koch-Pomeranz, H.-J. Hansen, H. Schmid, *Helv. Chim. Acta.* **1971**, 56, 2981-3004). In a round bottom flask under nitrogen atmosphere 2,2'-biphenol (94.4 mg, 0.51 mmol) and but-2-yne-1,4-diyl bis(4-methylbenzenesulfonate) (200 mg, 0.51 mmol) were dissolved in anhydrous acetonitrile (25 mL).  $\text{K}_2\text{CO}_3$  (350 mg, 2.53 mmol) was added and the mixture was stirred at room temperature for 12 days. The volatiles were removed and  $\text{H}_2\text{O}$  (50 mL) was added. The product was extracted with DCM (3x50 mL). The reunited organic

layers were washed with brine (30 mL) and dried over  $\text{Na}_2\text{SO}_4$ . The product was purified by flash chromatography on silica gel (eluent: Pentane/DCM = 4:1 to DCM) to give the product **1** (42 mg, 0.18 mmol, 29%) as colourless solid.

m.p. 129.7-132.5 °C.

$\text{IR}_{(\text{neat})}$  3053, 3023, 2989, 1952, 2919, 2863, 1595, 1574, 1499, 1470, 1451, 1434, 1348, 1258, 1248  $\text{cm}^{-1}$ .

$\delta_{\text{H}}$  (500 MHz,  $\text{CDCl}_3$ ) 7.37 (2H, ddd,  $J = 8.0, 7.0, 2.1$  Hz, ArH), 7.11 - 7.27 (6H, m, ArH), 4.47 - 4.58 (2H, m, CHH), 4.27 - 4.39 (2H, m, CHH).

$\delta_{\text{C}}$  (125 MHz,  $\text{CDCl}_3$ ) 154.4(C), 135.9 (C), 132.0 (CH), 129.0 (CH), 124.2 (CH), 122.5 (CH), 86.6 (C), 63.5 ( $\text{CH}_2$ ).

HRMS (ESI-Q-TOF)  $m/z$ :  $[\text{M} + \text{Na}]^+$  Calcd for  $\text{C}_{16}\text{H}_{12}\text{O}_2\text{Na}$  259.0730; Found 259.0725.

$^1\text{H}$  NMR (500 MHz,  $\text{CDCl}_3$ )

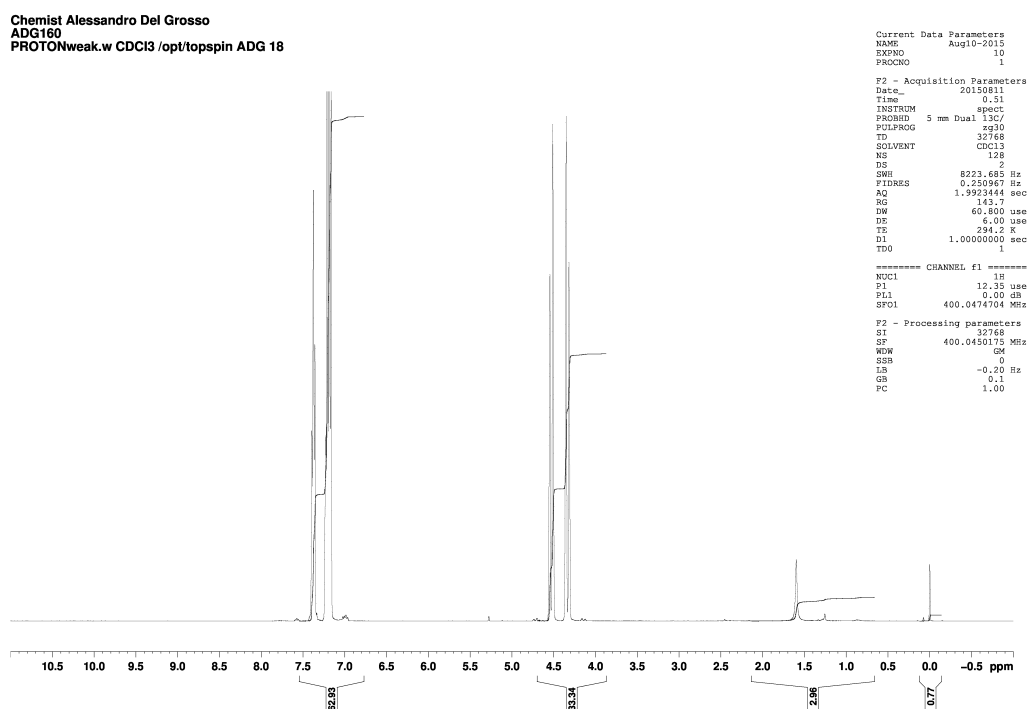

$^{13}\text{C}$  NMR (125 MHz,  $\text{CDCl}_3$ )

Chemist Alessandro Del Grosso  
ADG160  
C13deptq1w CDCl3 /opt/topspin ADG 18

Current Data Parameters  
NAME Aug11-2015  
EXPNO 14  
PROCNO 1

P2 - Acquisition Parameters  
Date\_ 20150811  
Time 0.28  
INSTRUM spect  
PROBHD 5 mm Dual 1H/1  
PULPROG zgpg30  
DEPTA 135  
SOLVENT CDCl3  
NS 12  
DS 4  
SWH 23980.814 Hz  
FIDRES 0.955018 Hz  
AQ 1.3664756 sec  
RG 6352  
DM 20.850 usec  
DE 1.00 usec  
TE 300.2 K  
CNST2 145.0000000  
D1 4.0000000 sec  
d11 0.0300000 sec  
D12 0.0300000 sec  
DELTA 0.00001916 sec

===== CHANNEL f1 =====  
NUC1 13C  
P1 15.05 usec  
P2 30.10 usec  
PL1 0.00 dB  
PL2 100.601638 dB

===== CHANNEL f2 =====  
CPDPRG2 waltz16  
NUC2 1H  
P3 11.25 usec  
P4 22.50 usec  
PCPD2 95.00 usec  
PL2 0.00 dB  
PL3 171.00 dB  
PL4 400.0466002 MHz

P2 - Processing parameters  
SI 32768  
SF 100.6213500 MHz  
WDW EM  
SSB 0  
LB 2.00 Hz  
GB 0  
PC 1.40

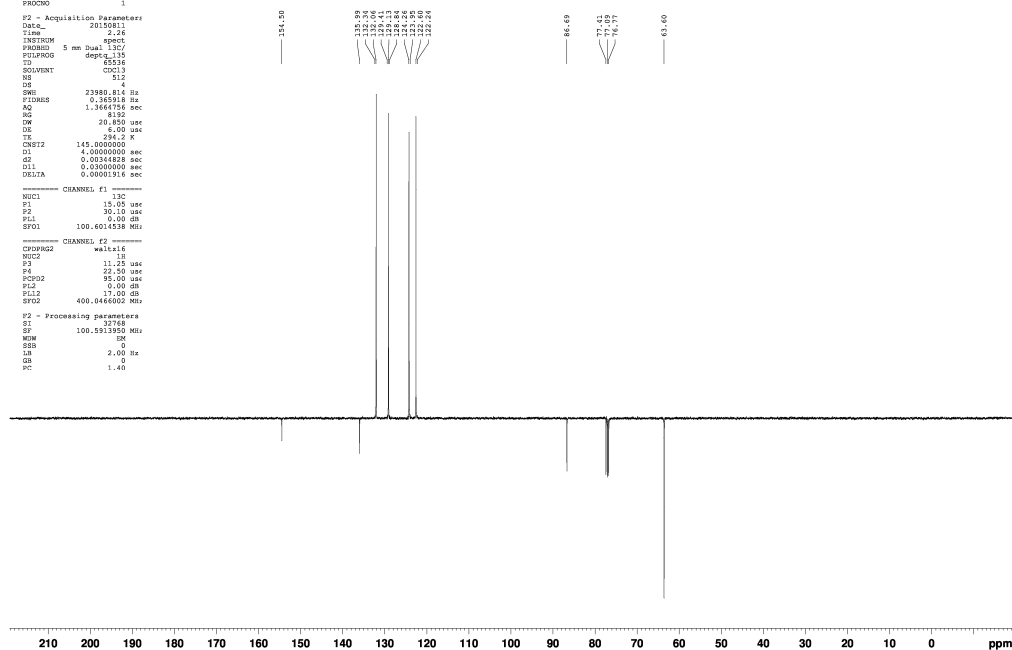

Chemist Alessandro Del Grosso  
ADG160  
COSY.w CDCl3 /opt/topspin3.2 ADG 20

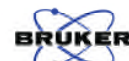

Current Data Parameters  
NAME Aug11-2015  
EXPNO 11  
PROCNO 1

P2 - Acquisition Parameters  
Date\_ 20150811  
Time 10.20  
INSTRUM spect  
PROBHD 5 mm CPDPR 13C  
PULPROG zgpg30  
DEPTA 135  
SOLVENT CDCl3  
NS 1  
DS 8  
SWH 4716.981 Hz  
FIDRES 2.303213 Hz  
AQ 0.2170880 sec  
RG 27.55  
DM 106.000 usec  
DE 40.00 usec  
TE 300.2 K  
D0 0.00000000 sec  
D1 1.9217400 sec  
D11 0.03000000 sec  
D12 0.00000000 sec  
D13 0.00000000 sec  
D14 0.00000000 sec  
D15 0.00001220 sec  
IN0 0.00001220 sec

===== CHANNEL f1 =====  
SF1 500.1319676 MHz  
NUC1 13C  
P1 9.10 usec  
P2 9.10 usec  
PL1 0.00 dB  
PL2 13.00000000 W  
PLW1 1.55249997 W

===== CHANNEL f2 =====  
SF2 500.1300233 MHz  
WDW EM  
SSB 0  
LB 0 Hz  
GB 0  
PC 1.40

P2 - Processing parameters  
SI 1624  
SF 500.1300233 MHz  
WDW EM  
SSB 0  
LB 0 Hz  
GB 0  
PC 1.40

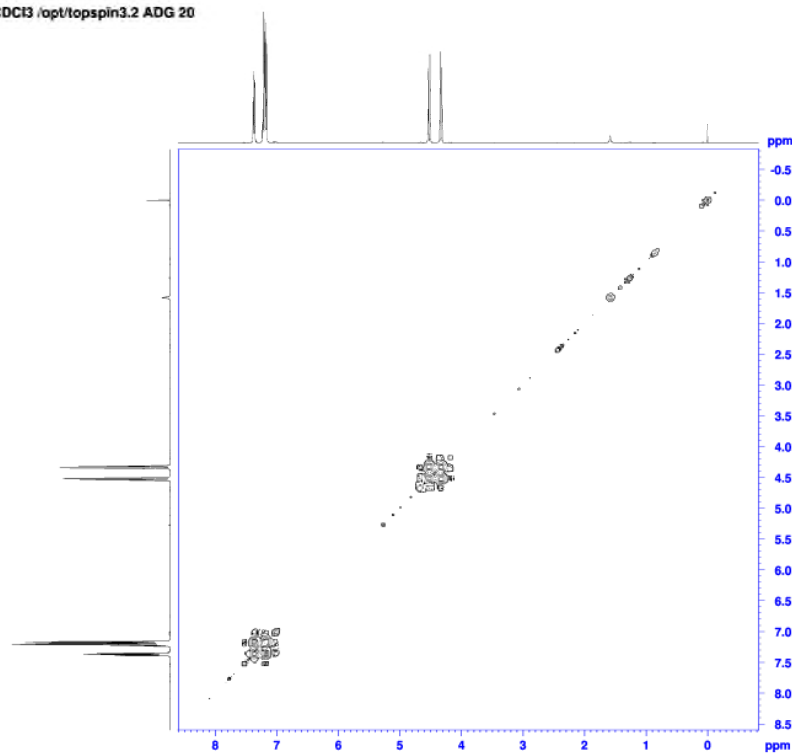



Chemist Alessandro Del Grosso  
ADG160  
HMBG.w CDCI3 /opt/topspin3.2 ADG 20

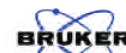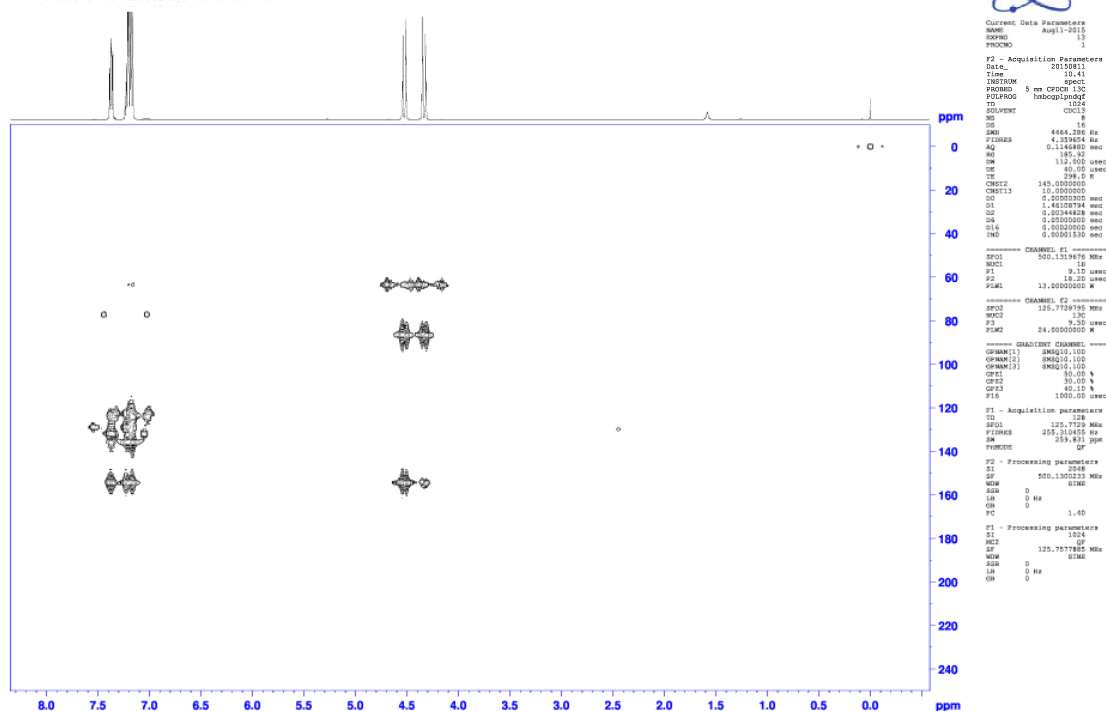

Chemist Alessandro Del Grosso  
ADG160  
HSQC.w CDCI3 /opt/topspin3.2 ADG 20

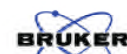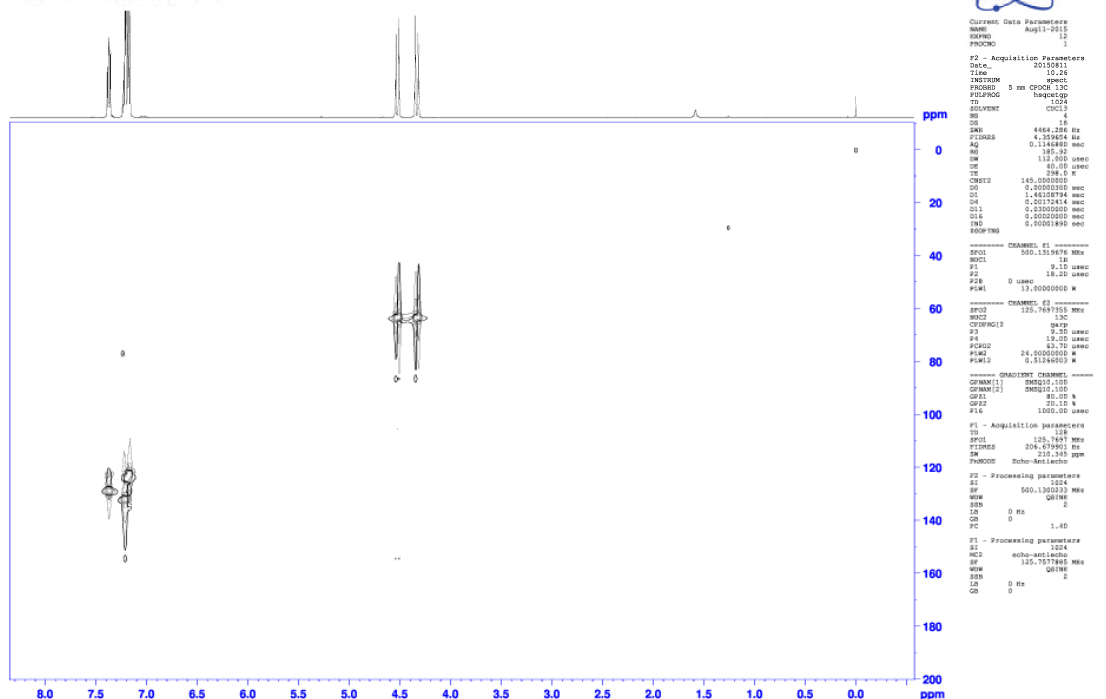

**Synthesis of Compound 2** *R*-12,17-dioxapentacyclo[16.8.0.0<sup>2</sup>,<sup>11</sup>.0<sup>3</sup>,<sup>8</sup>.0<sup>21</sup>,<sup>26</sup>]hexacos-  
1(26),2,4,6,8,10,18,20,22,24-decaen-14-yne **2**.

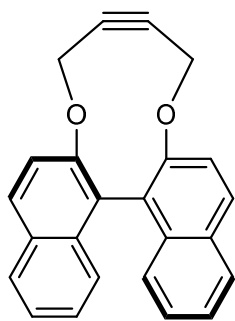

In a round bottom flask under nitrogen atmosphere (*R*)-BINOL (726 mg, 2.54 mmol) and but-2-yne-1,4-diyl bis(4-methylbenzenesulfonate) (2.0 g, 5.07 mmol) were dissolved in anhydrous acetonitrile (250 mL).  $K_2CO_3$  (3.5 g, 25.32 mmol) was added and the mixture was stirred at room temperature for 68 hours. The mixture was filtered through a plug of celite. The volatiles were removed and the product was purified by flash chromatography on silica gel (eluent: Petroleum Ether/EtOAc = 9:1 to EtOAc) to give compound **2** (121 mg, 0.36 mmol, 14%) as colourless solid. Crystals suitable for X-ray spectroscopy were grown by slow evaporation of DCM.  $[\alpha]_D^{25} +263.6$  (*c* 0.505,  $CHCl_3$ ).

m.p. 177.2-178.4 °C

IR<sub>(neat)</sub> 3060, 2954, 2913, 2861, 1662, 1619, 1586, 1503, 1472, 1457, 1426, 1405, 1349, 1333, 1268, 1251, 1207, 1194  $cm^{-1}$ .

$\delta_H$  (500 MHz,  $CDCl_3$ ) 8.01 (2H, d,  $J = 8.9$  Hz, *ArH*), 7.90 (2H, d,  $J = 8.2$  Hz, *ArH*), 7.38 - 7.45 (4H, m, *ArH*), 7.31 (4H, d,  $J = 3.7$  Hz, *ArH*), 4.51 - 4.58 (2H, m, *CHH*), 4.41 - 4.48 (2H, m, *CHH*).

$\delta_C$  (125 MHz,  $CDCl_3$ ) 152.5 (C), 133.7 (C), 131.1 (C), 130.3 (CH), 128.0 (CH), 127.8 (C), 126.6 (CH), 126.1 (CH), 125.2 (CH), 121.1 (CH), 88.0 (C), 62.3 ( $CH_2$ ).

HRMS (ESI-Q-TOF) *m/z*:  $[M + H]^+$  Calcd for  $C_{24}H_{17}O_2$  337.1223; Found 337.1224.

$^1H$  NMR (500 MHz,  $CDCl_3$ )

Chemist Alessandro Del Grosso  
ADG 139-1st  
PROTON.w CDCl<sub>3</sub> /opt/topspin3.2 ADG 18

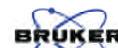

Current Data Parameters  
NAME May27-2016  
EXPNO 10  
PROCNO 1

F2 - Acquisition Parameters  
Date\_ 20160529  
Time 10.36  
INSTRUM spect  
PROBHD 5 mm CPDCH 13C  
PULPROG zgpg30  
TD 65536  
SOLVENT CDCl<sub>3</sub>  
NS 16  
DS 2  
SFO 10000.000 Hz  
FIDRES 0.152588 Hz  
AQ 5.2767595 sec  
RG 92.7  
DM 50.000 usec  
DE 40.00 usec  
TE 298.0 K  
D1 1.00000000 sec  
TDO 1

===== CHANNEL f1 =====  
SFO1 500.1330885 MHz  
NUC1 1H  
P1 9.10 usec  
PL1 13.00000000 W

F2 - Processing parameters  
SI 65536  
SF 500.1300238 MHz  
WDW EM  
SSB 0  
LB 0.30 Hz  
GB 0  
PC 1.00

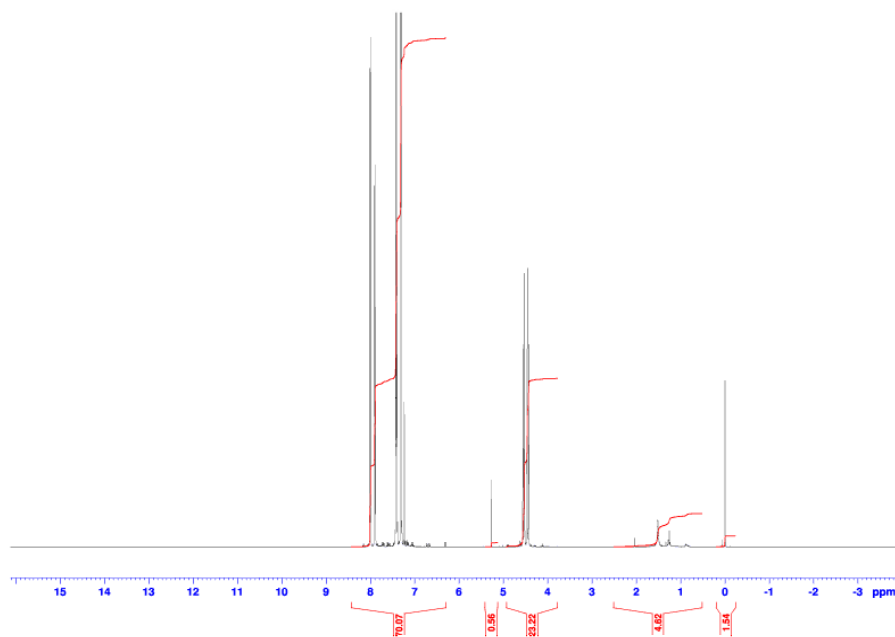

<sup>13</sup>C NMR (125 MHz, CDCl<sub>3</sub>)

Chemist Alessandro Del Grosso  
ADG 139-1st  
C13APT.w CDCl<sub>3</sub> /opt/topspin3.2 ADG 18

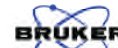

Current Data Parameters  
NAME May27-2016  
EXPNO 11  
PROCNO 1

F2 - Acquisition Parameters  
Date\_ 20160529  
Time 10.50  
INSTRUM spect  
PROBHD 5 mm CPDCH 13C  
PULPROG zgpg30  
TD 65536  
SOLVENT CDCl<sub>3</sub>  
NS 256  
DS 4  
SFO 125.7728795 MHz  
FIDRES 0.501934 Hz  
AQ 0.9961472 sec  
RG 185.92  
DM 15.200 usec  
DE 66.43 usec  
TE 298.0 K  
CNS12 145.000000  
CNS11 1.0000000  
D1 2.00000000 sec  
D12 0.00689655 sec  
TDO 1

===== CHANNEL f1 =====  
SFO1 125.7728795 MHz  
NUC1 13C  
P1 9.50 usec  
PL1 24.00000000 W

===== CHANNEL f2 =====  
SFO2 500.1320005 MHz  
NUC2 1H  
CPDPRG2 waltz16  
PCPD2 65.00 usec  
PLW2 13.00000000 W  
PLW12 0.26784000 W

F2 - Processing parameters  
SI 32768  
SF 125.7577885 MHz  
WDW EM  
SSB 0  
LB 1.00 Hz  
GB 0  
PC 1.40

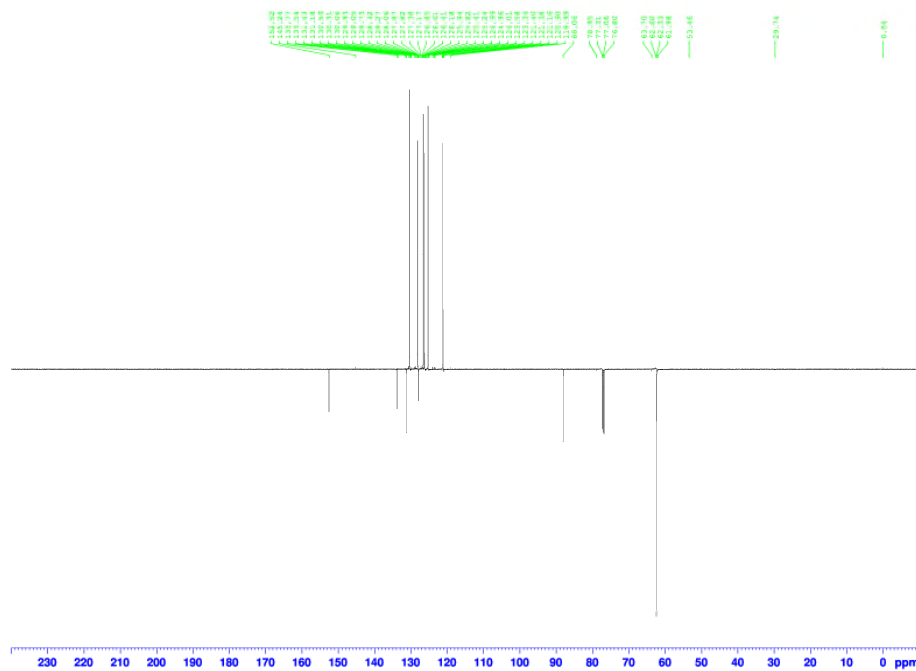

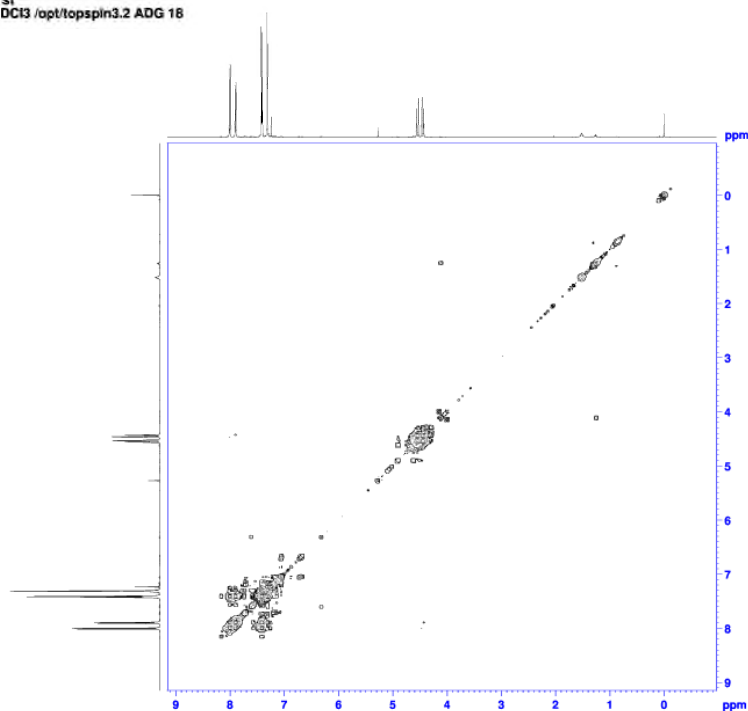[illegible]

Chemist Alessandro Del Grosso  
ADG 139-1st  
HSQC.w CDC13 (op)topspin3.2 ADG 18

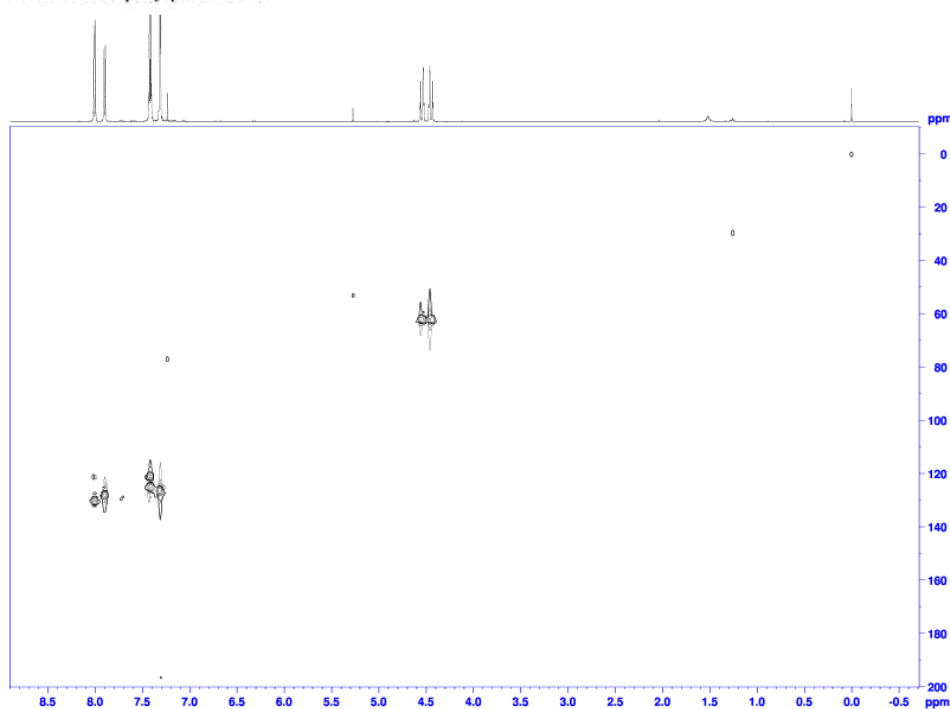

|  | Current Data Parameters          |
|--|----------------------------------|
|  | NAME My97-2014                   |
|  | DATE 20140701                    |
|  | PROGNO                           |
|  | <b>F1 Acquisition Parameters</b> |
|  | DATE 20160539                    |
|  | TIME 19:57                       |
|  | INSTRUM 5 MHz CPWCN LSC          |
|  | INTERFERE                        |
|  | FILEPROG harp-epg                |
|  | FILELEN 1214                     |
|  | CHANS 6                          |
|  | CHNLEN 4                         |
|  | CHN1 4607.4521 Hz                |
|  | CHN2 4607.5121 Hz                |
|  | CHN3 4607.5721 Hz                |
|  | CHN4 4607.6321 Hz                |
|  | CHN5 4607.6921 Hz                |
|  | CHN6 4607.7521 Hz                |
|  | CHN7 4607.8121 Hz                |
|  | CHN8 4607.8721 Hz                |
|  | CHN9 4607.9321 Hz                |
|  | CHN10 4607.9921 Hz               |
|  | CHN11                            |
|  | CHN12                            |
|  | <b>CHANNEL 01</b>                |
|  | NAME 200.13000012 Hz             |
|  | UNIT MHz                         |
|  | UNIT 9.12000000                  |
|  | UNIT 18.24000000                 |
|  | UNIT 9.12000000                  |
|  | UNIT 18.24000000                 |
|  | FILE 13.00000000 Hz              |
|  | <b>CHANNEL 02</b>                |
|  | NAME 120.76900000 Hz             |
|  | UNIT MHz                         |
|  | UNIT 9.12000000                  |
|  | UNIT 18.24000000                 |
|  | UNIT 9.12000000                  |
|  | UNIT 18.24000000                 |
|  | FILE 18.00000000 Hz              |
|  | <b>CHANNEL 03</b>                |
|  | NAME 82.00000000 Hz              |
|  | UNIT MHz                         |
|  | UNIT 9.12000000                  |
|  | UNIT 18.24000000                 |
|  | UNIT 9.12000000                  |
|  | UNIT 18.24000000                 |
|  | FILE 23.12000000 Hz              |
|  | <b>F1 Acquisition Parameters</b> |
|  | DATE 20160539                    |
|  | TIME 19:57                       |
|  | INSTRUM 5 MHz CPWCN LSC          |
|  | INTERFERE                        |
|  | FILEPROG harp-epg                |
|  | FILELEN 1214                     |
|  | CHANS 6                          |
|  | CHNLEN 4                         |
|  | CHN1 4607.4521 Hz                |
|  | CHN2 4607.5121 Hz                |
|  | CHN3 4607.5721 Hz                |
|  | CHN4 4607.6321 Hz                |
|  | CHN5 4607.6921 Hz                |
|  | CHN6 4607.7521 Hz                |
|  | CHN7 4607.8121 Hz                |
|  | CHN8 4607.8721 Hz                |
|  | CHN9 4607.9321 Hz                |
|  | CHN10 4607.9921 Hz               |
|  | CHN11                            |
|  | CHN12                            |
|  | <b>F1 Acquisition Parameters</b> |
|  | DATE 20160539                    |
|  | TIME 19:57                       |
|  | INSTRUM 5 MHz CPWCN LSC          |
|  | INTERFERE                        |
|  | FILEPROG harp-epg                |
|  | FILELEN 1214                     |
|  | CHANS 6                          |
|  | CHNLEN 4                         |
|  | CHN1 4607.4521 Hz                |
|  | CHN2 4607.5121 Hz                |
|  | CHN3 4607.5721 Hz                |
|  | CHN4 4607.6321 Hz                |
|  | CHN5 4607.6921 Hz                |
|  | CHN6 4607.7521 Hz                |
|  | CHN7 4607.8121 Hz                |
|  | CHN8 4607.8721 Hz                |
|  | CHN9 4607.9321 Hz                |
|  | CHN10 4607.9921 Hz               |
|  | CHN11                            |
|  | CHN12                            |
|  | <b>F1 Acquisition Parameters</b> |
|  | DATE 20160539                    |
|  | TIME 19:57                       |
|  | INSTRUM 5 MHz CPWCN LSC          |
|  | INTERFERE                        |
|  | FILEPROG harp-epg                |
|  | FILELEN 1214                     |
|  | CHANS 6                          |
|  | CHNLEN 4                         |
|  | CHN1 4607.4521 Hz                |
|  | CHN2 4607.5121 Hz                |
|  | CHN3 4607.5721 Hz                |
|  | CHN4 4607.6321 Hz                |
|  | CHN5 4607.6921 Hz                |
|  | CHN6 4607.7521 Hz                |
|  | CHN7 4607.8121 Hz                |
|  | CHN8 4607.8721 Hz                |
|  | CHN9 4607.9321 Hz                |
|  | CHN10 4607.9921 Hz               |
|  | CHN11                            |
|  | CHN12                            |
|  | <b>F1 Acquisition Parameters</b> |
|  | DATE 20160539                    |
|  | TIME 19:57                       |
|  | INSTRUM 5 MHz CPWCN LSC          |
|  | INTERFERE                        |
|  | FILEPROG harp-epg                |
|  | FILELEN 1214                     |
|  | CHANS 6                          |
|  | CHNLEN 4                         |
|  | CHN1 4607.4521 Hz                |
|  | CHN2 4607.5121 Hz                |
|  | CHN3 4607.5721 Hz                |
|  | CHN4 4607.6321 Hz                |
|  | CHN5 4607.6921 Hz                |
|  | CHN6 4607.7521 Hz                |
|  | CHN7 4607.8121 Hz                |
|  | CHN8 4607.8721 Hz                |
|  | CHN9 4607.9321 Hz                |
|  | CHN10 4607.9921 Hz               |
|  | CHN11                            |
|  | CHN12                            |
|  | <b>F1 Acquisition Parameters</b> |
|  | DATE 20160539                    |
|  | TIME 19:57                       |
|  | INSTRUM 5 MHz CPWCN LSC          |
|  | INTERFERE                        |
|  | FILEPROG harp-epg                |
|  | FILELEN 1214                     |
|  | CHANS 6                          |
|  | CHNLEN 4                         |
|  | CHN1 4607.4521 Hz                |
|  | CHN2 4607.5121 Hz                |
|  | CHN3 4607.5721 Hz                |
|  | CHN4 4607.6                      |

HMBC.w CDCl3 /opt/topspin3.2 ADG 18  
9-1st

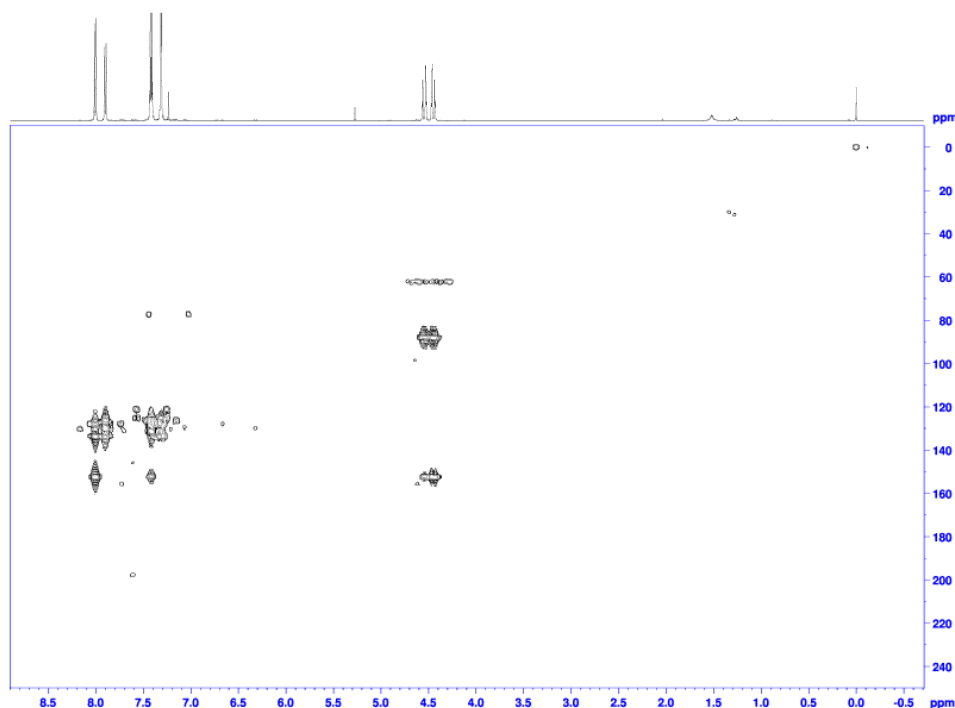

**BRUKER**

Current Data Parameters  
NAME: May07-2016  
EXPNO: 1  
PROCNO: 1

F2 - Acquisition Parameters  
Date\_ : 20160523  
Time : 11.12  
INSTRUM : spect  
PROBHD : 5 mm CPDCH 13C  
PULPROG : zgpg30p125d2  
TD : 1328  
SOLVENT : CDCl3  
NS : 16  
DS : 4  
SWH : 6807.4852 Hz  
FIDRES : 0.000112 Hz  
AQ : 0.1264962 sec  
RG : 180.52  
AW : 154.000 usec  
DE : 60.00 usec  
TE : 298.2 K  
CHES : 545.000000 sec  
CHET13 : 10.000000 sec  
OL : 0.00000000 sec  
OL1 : 1.44928700 sec  
OL2 : 0.00346420 sec  
OL4 : 0.00000000 sec  
OL6 : 0.00000000 sec  
END : 0.0001330 sec

===== CHANNEL f1 =====  
NUC1 : 13C  
P1 : 12.00 usec  
PL1 : 0.00 dB  
PL12 : 13.0000000 W

===== CHANNEL f2 =====  
NUC2 : 1H  
P2 : 8.10 usec  
PL2 : 19.00 dB  
PL12 : 13.0000000 W

===== CHANNEL f3 =====  
NUC3 : 13C  
P3 : 24.00000000 usec  
PL3 : 0.00 dB

===== CHANNEL f4 =====  
CPDPRG1 : zgpg30p125d2  
CPDPRG2 : zgpg30p125d2  
CPDPRG3 : zgpg30p125d2  
CPD1 : 30.00 %  
CPD2 : 30.00 %  
CPD3 : 30.00 %  
PL4 : 1000.00 usec

F1 - Acquisition Parameters  
SI : 32768  
SF : 125.761353 MHz  
WDW : EM  
SSB : 0  
GB : 0  
PC : 1.40

F1 - Processing parameters  
SI : 32768  
SF : 125.761353 MHz  
WDW : EM  
SSB : 0  
GB : 0  
PC : 1.40

F2 - Acquisition Parameters  
SI : 65536  
SF : 500.1362338 MHz  
WDW : EM  
SSB : 0  
GB : 0  
PC : 1.40

F2 - Processing parameters  
SI : 65536  
SF : 500.1362338 MHz  
WDW : EM  
SSB : 0  
GB : 0  
PC : 1.40

**Synthesis of Compound 3; 4-17-dibromo-8,13-dioxatricyclo[12.4.0.02,7]octadeca-1(14),2,4,6,15,17-hexaen-10-yne 3.**

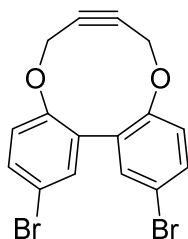

In a round bottom flask under nitrogen atmosphere 5,5'-dibromo-[1,1'-biphenyl]-2,2'-diol (436 mg, 1.27 mmol) and but-2-yne-1,4-diyl bis(4-methylbenzenesulfonate) (500 mg, 1.27 mmol) were dissolved in anhydrous acetonitrile (63 mL).  $K_2CO_3$  (876 mg, 6.34 mmol) was added and the mixture was stirred at room temperature for 5 days. The volatiles were removed and  $H_2O$  (100 mL) was added. The product was extracted with DCM (3 x 100 mL). The reunited organic layers were washed with brine (100 mL) and dried over  $Na_2SO_4$ . The product was purified by flash chromatography on silica gel (eluent: Pentane/DCM = 1:1) to give the product **3** (122 mg, 0.31 mmol, 24%) as colourless solid.

m.p. 169.4 °C dec.

IR<sub>(neat)</sub> 2963, 2908, 2858, 1734, 1585, 1566, 1556, 1490, 1461, 1440, 1406, 1371, 1343, 1248, 1192 cm<sup>-1</sup>.

$\delta_{\text{H}}$  (500 MHz, CDCl<sub>3</sub>) 7.49 (2H, dd,  $J = 8.6, 2.4$  Hz, ArH), 7.32 (2H, d,  $J = 2.4$  Hz, ArH), 7.04 (2H, d,  $J = 8.6$  Hz, ArH), 4.50 - 4.62 (2H, m, CHH), 4.25 - 4.35 (2H, m, CHH).

$\delta_{\text{C}}$  (125 MHz, CDCl<sub>3</sub>) 153.5 (C), 136.6 (C), 134.6 (CH), 132.5 (CH), 124.4 (CH), 117.3 (C), 86.6 (C), 63.6 (CH<sub>2</sub>).

HRMS (ESI-Q-TOF)  $m/z$ : [M + H]<sup>+</sup> Calcd for C<sub>16</sub>H<sub>11</sub><sup>79</sup>Br<sub>2</sub>O<sub>2</sub> 392.9120; Found 392.9126.

#### **Alternative procedure using butanone as solvent.**

In a round bottom flask under a nitrogen atmosphere, 5,5'-dibromo-2'-methyl-3',4'-dihydro-[1,1'-biphenyl]-2-ol (689 mg, 2.00 mmol), potassium carbonate (1.38 g, 10.0 mmol) and but-2-yne-1,4-diyl bis(4-methylbenzenesulfonate) (789 mg, 2.00 mmol) were dissolved in butan-2-one (100 mL). The mixture was degassed, stirred at 80 °C for 5 days. The butan-2-one was evaporated under reduced pressure. The organic fractions were redissolved with water (100 mL) and extracted with DCM (3 x 50 mL). The organic extracts were dried over magnesium sulphate, filtered and the DCM was evaporated under reduced pressure. The product was purified by column chromatography (eluent: hexane to hexane/ethyl acetate 88:12) to obtain the product **3** as a white solid (363 mg, 0.92 mmol, 46%). The data for the product matched that reported above.

<sup>1</sup>H NMR (500 MHz, CDCl<sub>3</sub>)

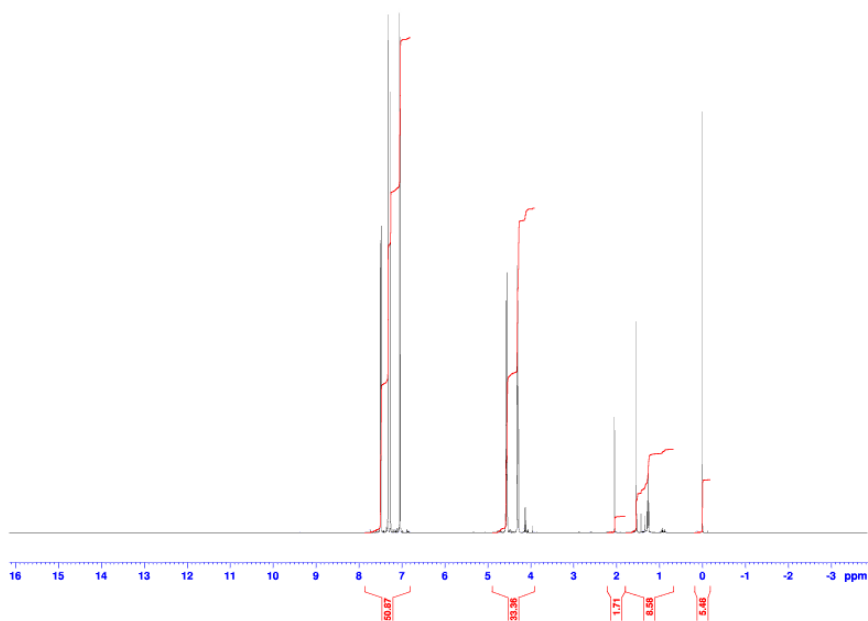

```

Current Data Parameters
NAME          Feb29-2016
EXPNO         10
PROCNO        10

F2 - Acquisition Parameters
Date_         20160301
Time          0.52
INSTRUM       spect
PROBHD        5 mm CPDCH 13C
PULPROG       zgpg30
PCPDPRG       TO
SOLVENT       CDCl3
NS            16
DS            4
SWH           10000.000 Hz
FIDRES        0.1250898
AQ            3.2767999 sec
RG            185.95
DM            30.000
DE            240.000 usec
TE            298.0 K
DQ            1.00000000 sec
T0            1
===== CHANNEL f1 =====
SFO1          500.1303885 MHz
NUC1           13
P1            9.10
PL11          13.00000000 W

F2 - Processing parameters
SI            1
SF            500.1303885 MHz
WDW           EM
SSB           0
GB            0
PC            0.30 Hz
LR            0
GB            0
PC            1.00

```

 $^{13}\text{C}$  NMR (125 MHz,  $\text{CDCl}_3$ )

Chemist Alessandro Del Grosso  
ADG 228  
C13APT.w CDCI3 /opt/topspin3.2 ADG 57

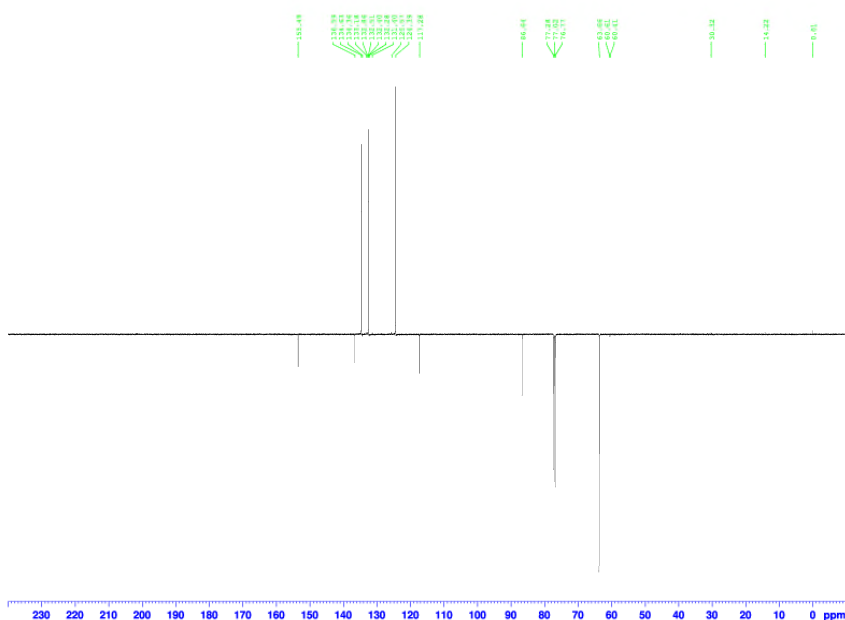[illegible]

2D COSY NMR spectrum of compound 1. The x-axis represents the  $^1\text{H}$  NMR spectrum (0.5 to 8.0 ppm) and the y-axis represents the  $^{13}\text{C}$  NMR spectrum (0 to 200 ppm). The diagonal shows the 1D  $^1\text{H}$  and  $^{13}\text{C}$  NMR spectra. Off-diagonal cross-peaks indicate scalar coupling between protons and carbons. Key cross-peaks are observed between aromatic protons (6.8–7.5 ppm) and carbons (120–140 ppm), and between aliphatic protons (4.2–4.5 ppm) and carbons (20–25 ppm).

[illegible]



**Synthesis of Compound 4;** 4-6-15-17-tetrabromo-8,13-dioxatricyclo[12.4.0.0<sup>2,7</sup>]octadeca-1(14),2,4,6,15,17-hexaen-10-yne **4**.

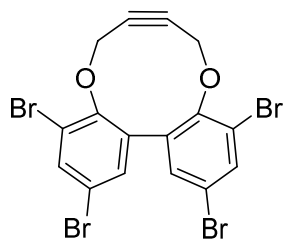

In a round bottom flask under nitrogen atmosphere 3,3',5,5'-dibromo-[1,1'-biphenyl]-2,2'-diol (636 mg, 1.27 mmol) and but-2-yne-1,4-diyl bis(4-methylbenzenesulfonate) (500 mg, 1.27 mmol) were dissolved in anhydrous acetonitrile (63 mL). K<sub>2</sub>CO<sub>3</sub> (876 mg, 6.34 mmol) was added and the mixture was stirred at room temperature for 10 days. The volatiles were removed and H<sub>2</sub>O (100 mL) was added. The product was extracted with DCM (3x150 mL). The reunited organic layers were washed with brine (100 mL) and dried over Na<sub>2</sub>SO<sub>4</sub>. The product was purified by flash chromatography on silica gel (eluent: Petroleum ether/EtOAc = 4:1 to 3:1) to give the product **4** (411 mg, 0.74 mmol, 59%) as colourless solid.

m.p. 170.7 °C dec.

IR<sub>(neat)</sub> 3094, 3065, 2976, 2961, 2930, 2907, 2854, 1569, 1537, 1461, 1443, 1420, 1369, 1336, 1238, 1207 cm<sup>-1</sup>.

δ<sub>H</sub> (500 MHz, CDCl<sub>3</sub>) 7.75 (2H, d, *J* = 2.4 Hz, Ar*H*), 7.28 (2H, d, *J* = 2.4 Hz, Ar*H*), 4.68 - 4.75 (2H, m, CH*H*), 4.47 - 4.54 (2H, m, CH*H*).

δ<sub>C</sub> (125 MHz, CDCl<sub>3</sub>) 149.2 (C), 137.8 (C), 135.6 (CH), 134.1 (CH), 119.0 (C), 117.8 (C), 86.7 (C), 60.8 (CH<sub>2</sub>).

HRMS (ESI-Q-TOF) *m/z*: [M + Na]<sup>+</sup> Calcd for C<sub>16</sub>H<sub>8</sub><sup>79</sup>Br<sub>4</sub>O<sub>2</sub>Na 570.7150; Found 570.7135.

<sup>1</sup>H NMR (500 MHz, CDCl<sub>3</sub>).

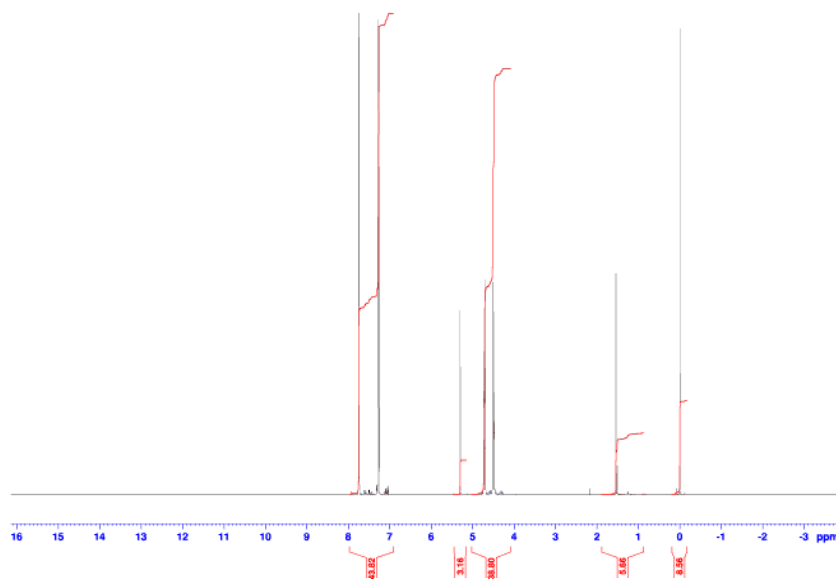 $^{13}\text{C}$  NMR (125 MHz,  $\text{CDCl}_3$ )

Chemist Alessandro Del Grosso  
ADG 229  
C13APT.w CDCl3 /opt/topspin3.2 ADG 58

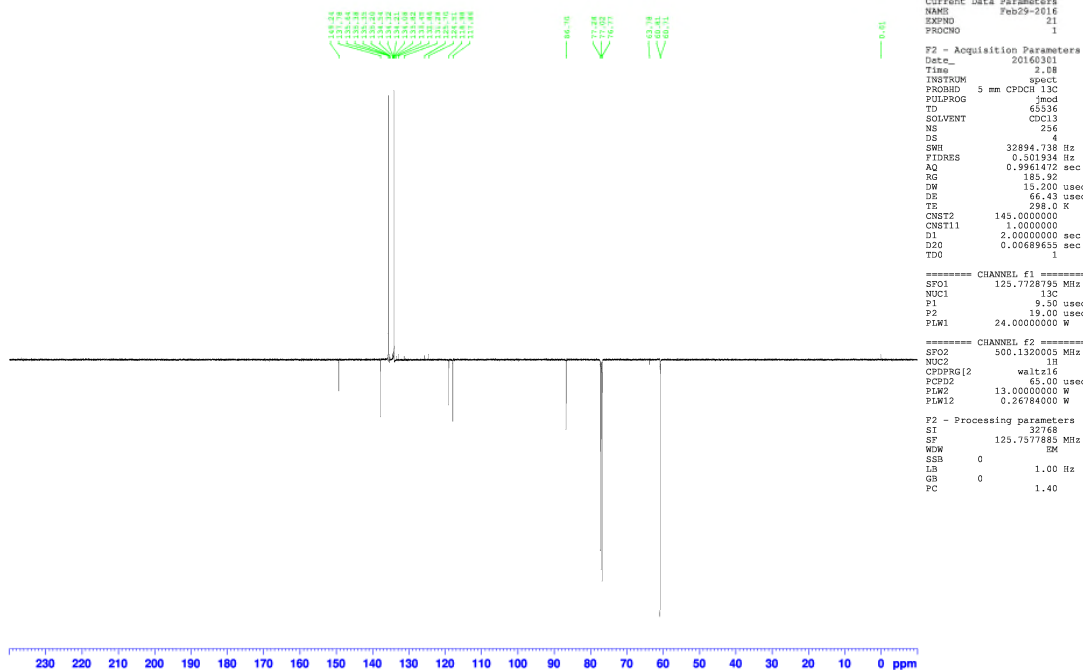

Chemist Alessandro Del Grosso  
ADG 229  
HSQC.w CDC13 /opt/topspin3.2 ADG 58

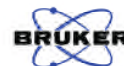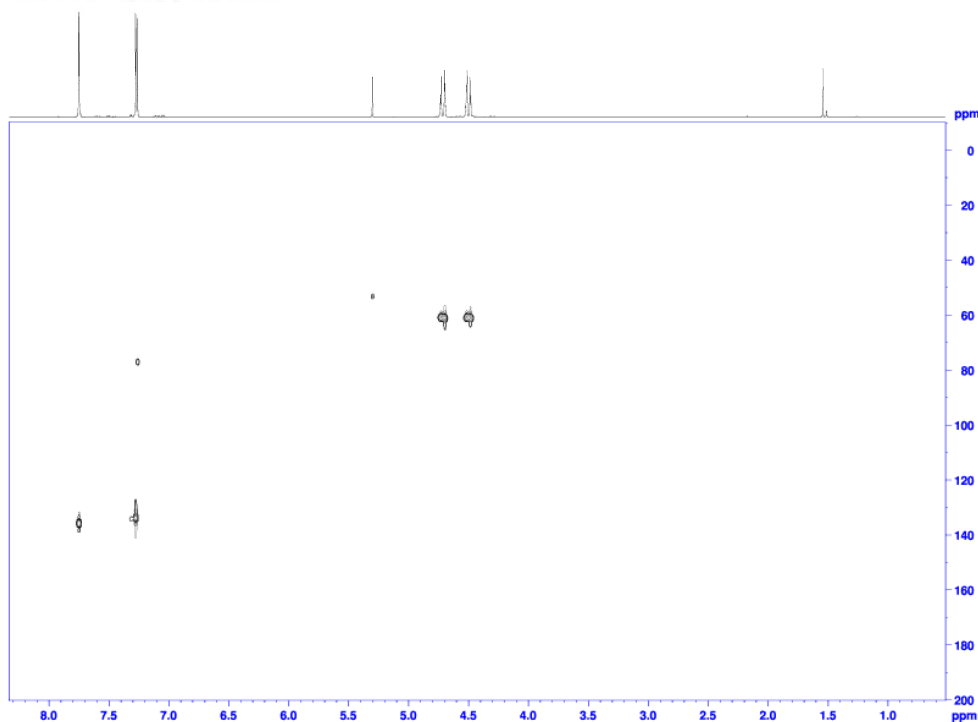

Chemist Alessandro Del Grosso  
ADG 229  
HMBC.w CDC13 /opt/topspin3.2 ADG 58

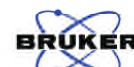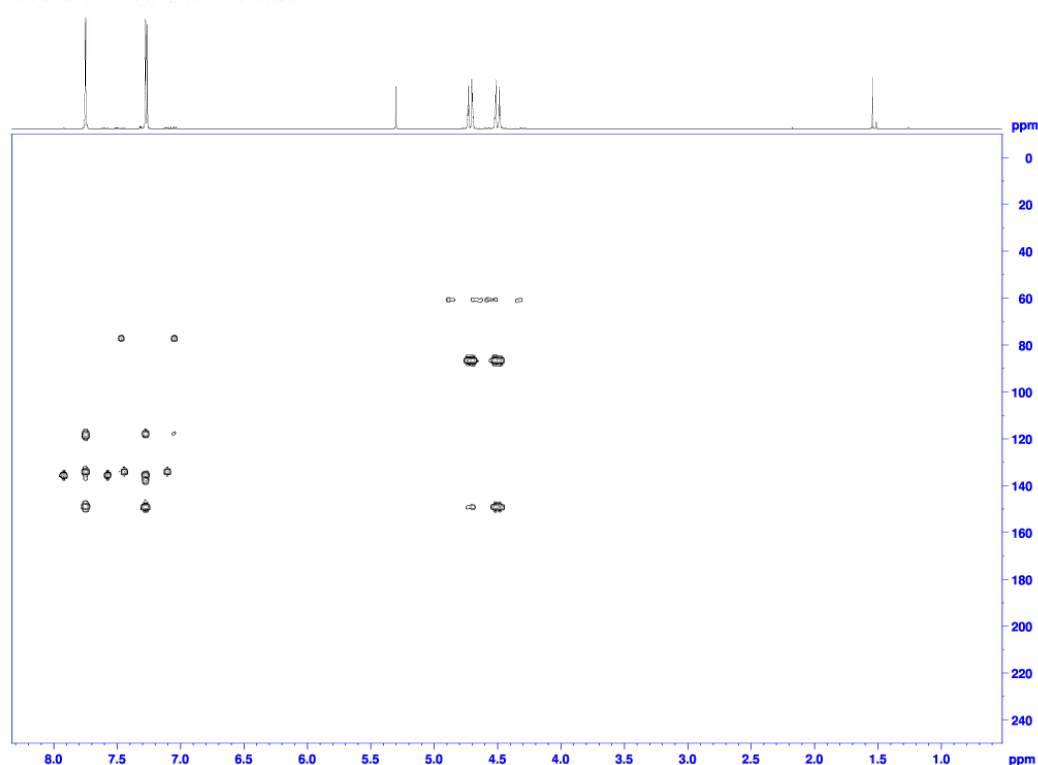

**Synthesis of Compound 11;** Methyl 8,13-dioxatricyclo[12.4.0.0<sup>2,7</sup>]octadeca-1(18),2(7),3,5,14,16-hexaen-10-yne-4-carboxylate **11**.

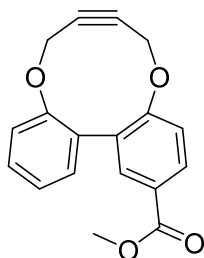

In a round bottom flask under nitrogen atmosphere methyl 2',6-dihydroxy-[1,1'-biphenyl]-3-carboxylate (313 mg, 1.28 mmol) **12** and but-2-yne-1,4-diyl bis(4-methylbenzenesulfonate) (500 mg, 1.27 mmol) were dissolved in anhydrous acetonitrile (63 mL). K<sub>2</sub>CO<sub>3</sub> (876 mg, 6.34 mmol) was added and the mixture was stirred at room temperature for 13 days. The volatiles were removed and H<sub>2</sub>O (100 mL) was added. The product was extracted with DCM (3x150 mL). The reunited organic layers were washed with brine (100 mL) and dried over Na<sub>2</sub>SO<sub>4</sub>. The product was purified by flash chromatography on silica gel (eluent: Petroleum ether/EtOAc = 4:1 to 3:1) to give compound **11** (188 mg, 0.64 mmol, 50%) as colourless solid. m.p. 121.1-122.4 °C.

IR<sub>(neat)</sub> 2952, 2921, 2854, 1713, 1608, 1598, 1577, 1499, 1475, 1434, 1405, 1346, 1307, 1288, 1266, 1232, 1190 cm<sup>-1</sup>.

$\delta_H$  (500 MHz, CDCl<sub>3</sub>) 8.07 (1H, dd,  $J$  = 8.5, 2.2 Hz, ArH), 7.93 (1H, d,  $J$  = 2.2 Hz, ArH), 7.37 - 7.44 (1H, m, ArH), 7.16 - 7.25 (4H, m, ArH), 4.49 - 4.62 (2H, m, CHH), 4.30 - 4.41 (2H, m, CHH), 3.88 (3H, s, CH<sub>3</sub>).

$\delta_C$  (125 MHz, CDCl<sub>3</sub>) 166.6 (C), 158.5 (C), 154.4 (C), 136.0 (C), 135.0 (C), 133.7 (CH), 131.8 (CH), 130.7 (CH), 129.5 (CH), 126.2 (C), 124.3 (CH), 122.8 (CH), 122.6 (CH), 87.2 (C), 86.1 (C), 63.7 (CH<sub>2</sub>), 63.5 (CH<sub>2</sub>), 52.1 (CH<sub>3</sub>).

m/z (ESI) [M + Na]<sup>+</sup>, 317.1

HRMS (ESI-Q-TOF) m/z: [M + Na]<sup>+</sup> Calcd for C<sub>18</sub>H<sub>14</sub>O<sub>4</sub>Na 317.0784; Found 317.0789.

<sup>1</sup>H NMR (500 MHz, CDCl<sub>3</sub>)

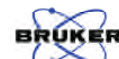

```
Current Data Parameters
NAME          Feb18-2016
EXPNO         10
PROCNO        1
```

```
F2 - Acquisition Parameters
Date_      20160218
Time       8.46
INSTRUM    spect
PROBHD     5 mm CPDCH 13C
PULPROG    zg30
TD          65536
SOLVENT    CDCl3
NS          16
DS          2
SWH         10000.000 Hz
FIDRES     0.132588 Hz
AQ         3.2767999 sec
RG          118.71
DW          30.000 usec
DE          40.00 usec
TE          298.0 K
D1         1.00000000 sec
TQO
```

```

===== CHANNEL f1 =====
SF01      500.1300885 MHz
NUC1      1H
P1        9.10 usec
P1M1      13.00000000 W

F2 - Processing parameters
ST        65536
SF        500.1300127 MHz
WDM       72M
SSB       0
LB        0.30 Hz
GB        0
PC        1.00

```

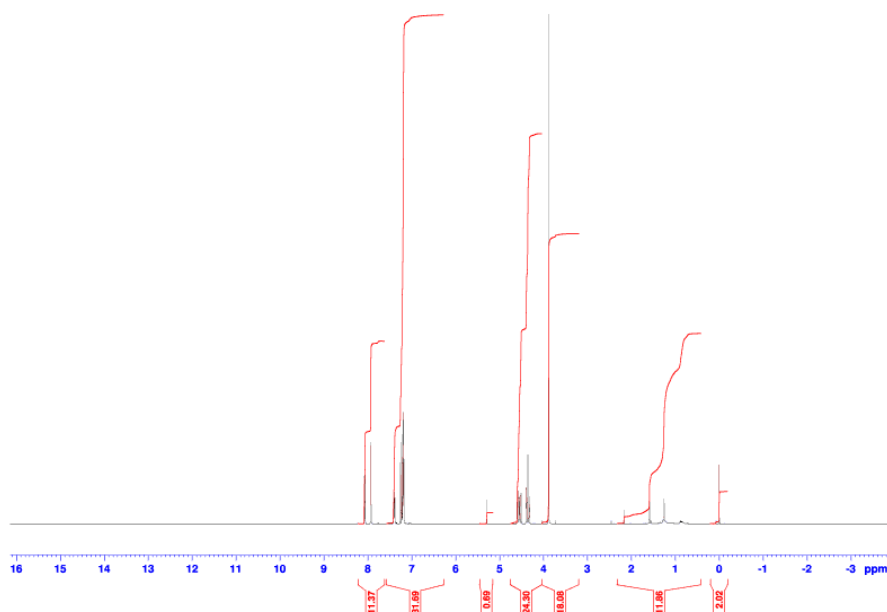 $^{13}\text{C}$  NMR (125 MHz,  $\text{CDCl}_3$ )

C13APT.w CDCl3 /opt/topspin3.2 ADG 56

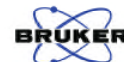

```
Current Data Parameters
NAME          Feb18-2016
EXPNO         14
PROCNO        1
```

```

F2 - Acquisition Parameters
Date_      20160218
Time       9.50
INSTRUM    spect
PROBHD     5 mm CPDCH 13C
PULPROG    jmod
TD         65536
SOLVENT    CDCl3
NS         256
DS         4
SWH        32894.738 Hz
FIDRES     0.501934 Hz
AQ         0.9961472 sec
RG         185.92
DE         15.200 usec
WDW         66.43 usec
TE         298.0 K
CNST72     145.0000000
CNST11     1.0000000
D1         2.0000000 sec
D20        0.00689655 sec

```

```
TD0          1
===== CHANNEL f1 =====
SFO1        125.7728795 MHz
NUC1         13C
P1           9.50 usec
P2           19.00 usec
PIW1        24.00000000 W
```

```
===== CHANNEL f2 =====
SFO2      500.1320005 MHz
NUC2              1H
CPDPRG2    waltz16
PCPD2              65.00 usec
PIW2       13.00000000 W
PIW12      0.26784000 W
```

```
F2 - Processing parameters
SI          32768
SF          125.7577885 MHz
WDW         EM
SSB         0
LB          1.00 Hz
GB          0
PC          1.40
```

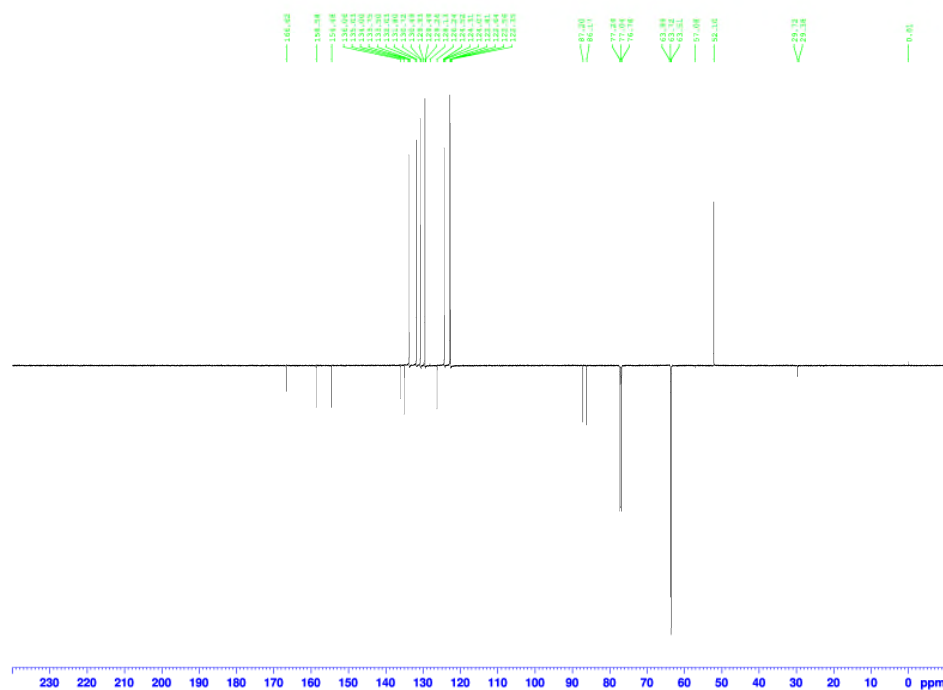

Chemist Alessandro Del Grosso  
ADG298  
COSY.w CDC13 /opt/topspin3.2 ADG 56

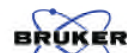

Current Data Parameters  
NAME Feb18-2016  
PROCNO 1

F2 - Acquisition Parameters  
Date\_ 20160218  
Time 8.48  
INSTRUM spect  
PROBHD 5 mm CPDQX 13C  
PULPROG zgpg30  
TD 65536  
SOLVENT CDCl3  
NS 4  
DS 2  
SWH 4882.812 Hz  
FIDRES 2.36466 Hz  
AQ 0.2097102 sec  
RG 40.97  
DM 102.400 usec  
DE 60.00 usec  
TE 298.2 K  
D1 0.0000000 sec  
D11 1.3303790 sec  
D12 0.0000000 sec  
D13 0.0000000 sec  
D16 0.0000000 sec  
D19 0.0000000 sec  
END

===== CHANNEL f1 =====  
NUC1 500.130017 MHz  
NUC2 13  
P1 9.10 usec  
P17 2000.00 usec  
PL1 13.0000000 W  
PL10 1.33249997 W

===== GRADIENT CHANNEL =====  
GPM1[1] SMOG10.100  
GPM2 10.00 %  
GPM3 1000.00 usec

F1 - Acquisition parameters  
TD 128  
SF 500.130127 MHz  
FIDRES 38.109756 Hz  
SW 9.784 ppm  
FWDGSE QF

F2 - Processing parameters  
SI 1024  
SF 500.130017 MHz  
WDW QF  
SSB 0 Hz  
GB 0  
PC 1.40

F1 - Processing parameters  
SI 1024  
SF 500.130017 MHz  
WDW QF  
SSB 0 Hz  
GB 0

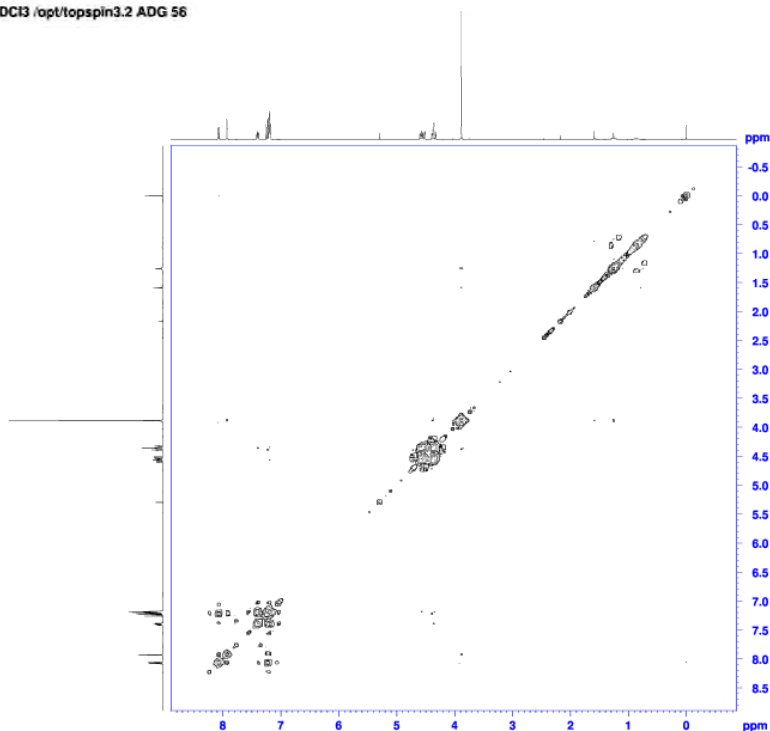

Chemist Alessandro Del Grosso  
ADG298  
HSQC.w CDC13 /opt/topspin3.2 ADG 56

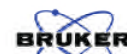

Current Data Parameters  
NAME Feb18-2016  
PROCNO 12

F2 - Acquisition Parameters  
Date\_ 20160218  
Time 8.54  
INSTRUM spect  
PROBHD 5 mm CPDQX 13C  
PULPROG zgpg30  
TD 65536  
SOLVENT CDCl3  
NS 4  
DS 2  
SWH 4829.629 Hz  
FIDRES 4.101122 Hz  
AQ 0.1105820 sec  
RG 385.82  
DM 108.000 usec  
DE 60.00 usec  
TE 298.2 K  
D1 0.0000000 sec  
D11 1.48518397 sec  
D12 0.00170414 sec  
D13 0.0000000 sec  
D16 0.0000000 sec  
D19 0.0001890 sec  
END

===== CHANNEL f1 =====  
SPUL 500.130017 MHz  
NUC1 13  
P1 9.10 usec  
P2 18.20 usec  
P2B 0 usec  
PL1 13.0000000 W

===== CHANNEL f2 =====  
SPUL 125.767765 MHz  
NUC2 13C  
P1 9.10 usec  
P2 18.20 usec  
P2B 0 usec  
PL1 13.0000000 W

===== GRADIENT CHANNEL =====  
GPM1[1] SMOG10.100  
GPM2 10.00 %  
GPM3 80.00 %  
GPM4 1000.00 usec

F1 - Acquisition parameters  
TD 128  
SF 500.130127 MHz  
FIDRES 208.679801 Hz  
SW 212.749 ppm  
FWDGSE Echo-Antiecho

F2 - Processing parameters  
SI 1024  
SF 500.130017 MHz  
WDW QF  
SSB 0 Hz  
GB 0  
PC 1.40

F1 - Processing parameters  
SI 1024  
SF 125.767765 MHz  
WDW QF  
SSB 0 Hz  
GB 0

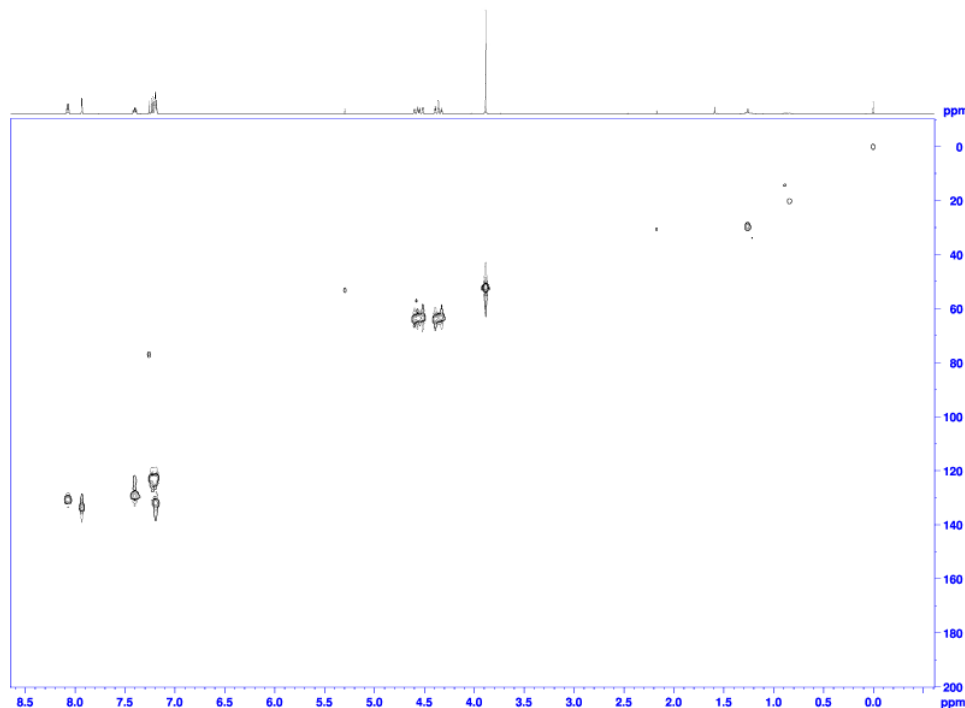

Chemist Alessandro Del Grosso  
ADG298  
HMBC.w CDCl<sub>3</sub> /opt/topspin3.2 ADG 56

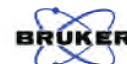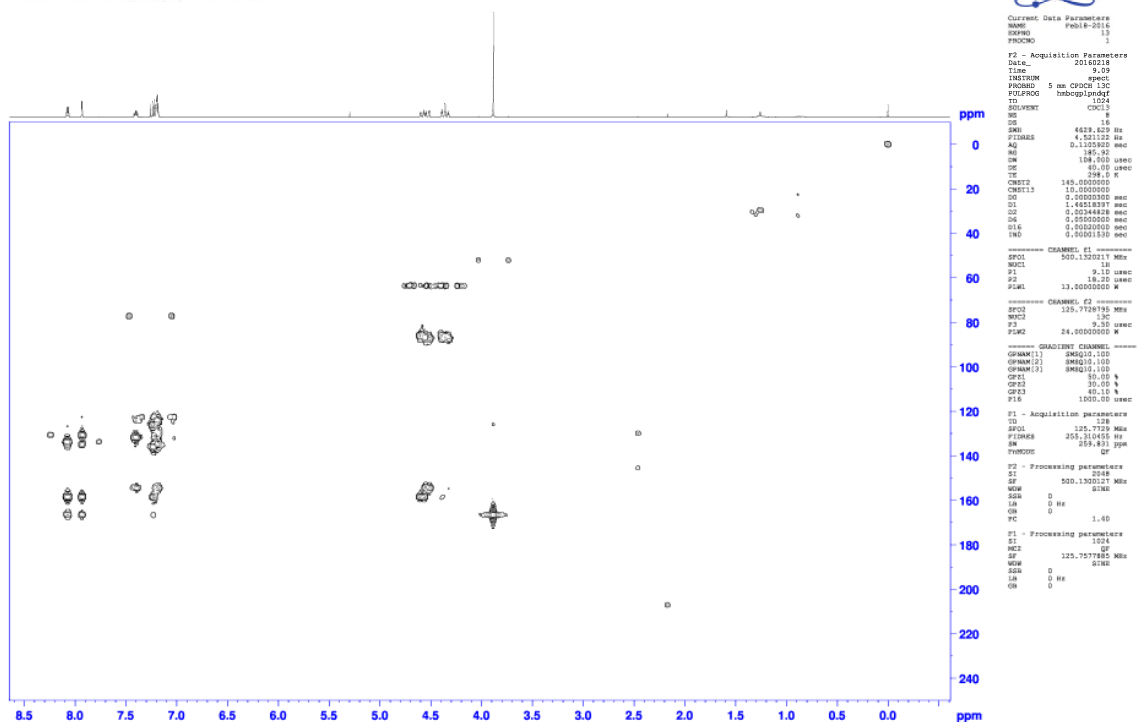

From this procedure, some 2+2 (54 mg, 15 %) and some 3+3 (36 mg, 10 %) product were also isolated.

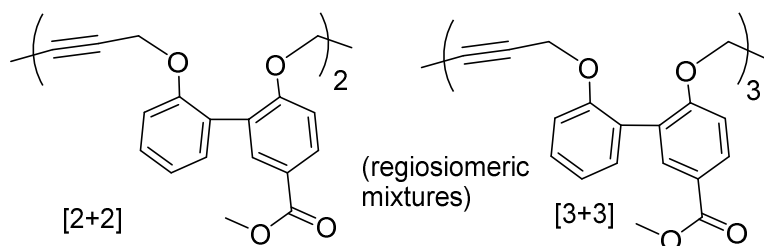

The 2+2 product NMRs are below (298b). The HRMS is also shown, to confirm the structure of the macrocycle:

<sup>1</sup>H NMR (500 MHz, CDCl<sub>3</sub>).

Chemist Alessandro Del Grosso  
ADG298b  
PROTON.w CDC13 /opt/topspin3.2 ADG 34

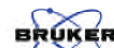

Current Data Parameters  
NAME Aug05-2016  
EXPNO 10  
PROCNO 1

F2 - Acquisition Parameters  
Date\_ 20160805  
Time 8.38  
INSTRUM spect  
PROBHD 5 mm CPDCH 13C  
PULPROG zg30  
TD 65536  
SOLVENT CDCl3  
NS 16  
DS 2  
SWH 10000.000 Hz  
FIDRES 0.152888 Hz  
AQ 3.2767999 sec  
RG 60.07  
DM 36.000 usec  
DE 45.00 usec  
TE 298.0 K  
D1 1.0000000 sec  
TD0 1

===== CHANNEL f1 =====  
SFO1 500.130085 MHz  
NUC1 1H  
P1 9.10 usec  
PLW1 13.0000000 W

F2 - Processing parameters  
SI 65536  
SF 500.1300166 MHz  
WDW EM  
SSB 0  
LB 0.30 Hz  
GB 0  
PC 1.00

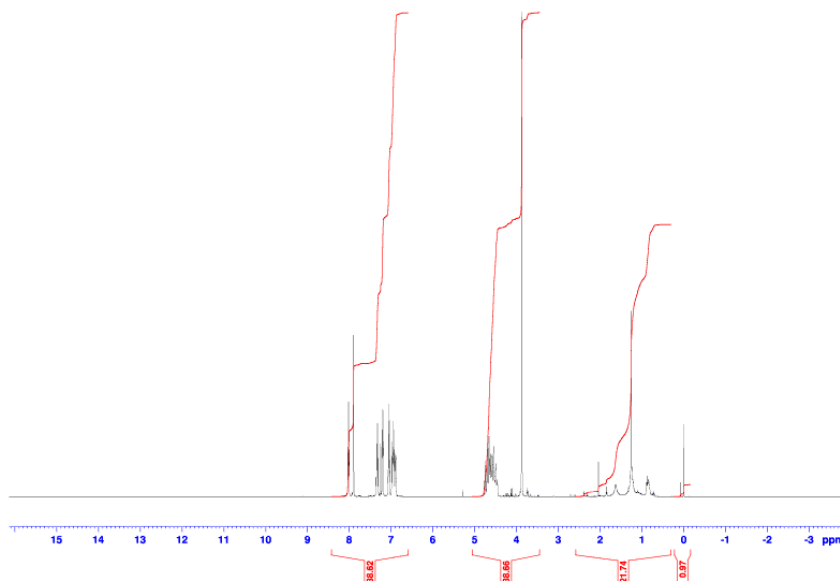

<sup>13</sup>C NMR (125 MHz, CDCl<sub>3</sub>).

Chemist Alessandro Del Grosso  
ADG298b  
C13APT.w CDC13 /opt/topspin3.2 ADG 34

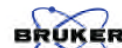

Current Data Parameters  
NAME Aug05-2016  
EXPNO 18  
PROCNO 1

F2 - Acquisition Parameters  
Date\_ 20160805  
Time 8.42  
INSTRUM spect  
PROBHD 5 mm CPDCH 13C  
PULPROG jmod  
TD 65536  
SOLVENT CDCl3  
NS 256  
DS 4  
SWH 32894.738 Hz  
FIDRES 0.501934 Hz  
AQ 0.9961472 sec  
RG 185.92  
DM 15.200 usec  
DE 66.43 usec  
TE 298.0 K  
CNST2 145.0000000  
CNST11 1.0000000  
D1 2.0000000 sec  
D20 0.00689655 sec  
TD0 1

===== CHANNEL f1 =====  
SFO1 125.7728795 MHz  
NUC1 13C  
P1 9.50 usec  
P2 19.00 usec  
PLW1 24.0000000 W

===== CHANNEL f2 =====  
SFO2 500.1320005 MHz  
NUC2 1H  
CPDPRG12 waltz16  
PULPROG2 zgpg30  
PLW2 13.0000000 W  
PLW12 0.26784000 W

F2 - Processing parameters  
SI 32768  
SF 125.7577885 MHz  
WDW EM  
SSB 0  
LB 1.00 Hz  
GB 0  
PC 1.40

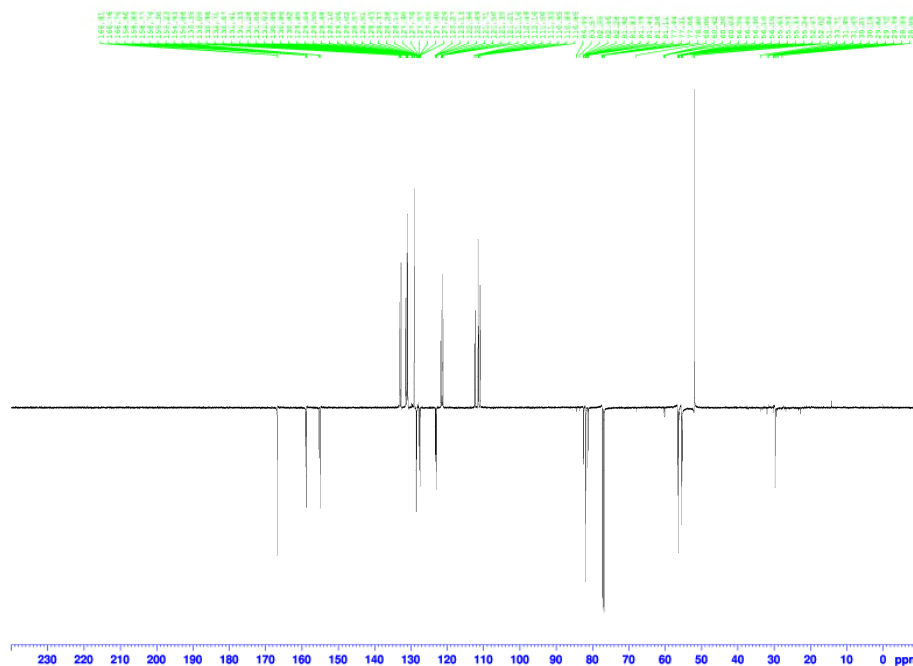



Chemist Alessandro Del Grosso  
ADG298b  
COSY.w CDCl<sub>3</sub> /opt/topspin3.2 ADG 34

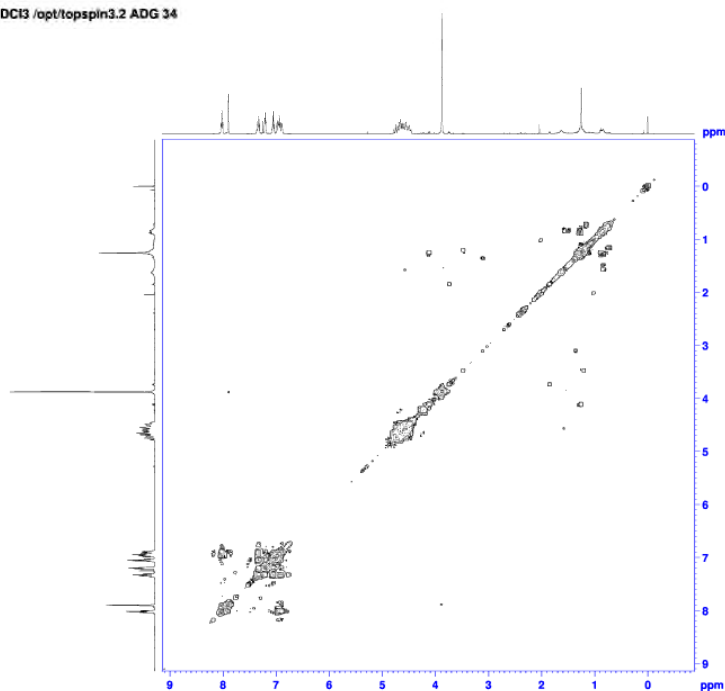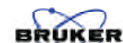

Current Data Parameters  
NAME Aug05-2016  
EXPNO 1  
PROCNO 1  
F2 - Acquisition Parameters  
Date\_ 20160805  
Time 8.40  
INSTRUM spect  
PROBHD 5 mm CPCH 13C  
PULPROG zgpg30  
TD 65536  
SOLVENT CDCl<sub>3</sub>  
NS 1  
DS 8  
SWH 5013.368 Hz  
FIDRES 2.441384 Hz  
AQ 0.2042339 sec  
RG 68.09  
RW 88.333 usec  
DC 40.00 usec  
TE 298.0 K  
D0 0.0000000 sec  
D1 1.93631199 sec  
D11 0.0000000 sec  
D12 0.0000000 sec  
D13 0.0000000 sec  
D14 0.0000000 sec  
D15 0.00019860 sec  
ZNG 0.00019860 sec  
===== CHANNEL f1 =====  
NUC1 13C  
P1 10.00 usec  
PL1 0.00 usec  
P12 13.00 usec  
PL12 13.0000000 W  
PL120 1.3344897 W  
===== GRADIENT CHANNEL =====  
GPRAM[1] RMSD10.100  
GPRAM[2] 10.00 %  
P16 1000.00 usec  
F1 - Acquisition parameters  
TD 128  
SFO1 500.130164 MHz  
FIDRES 39.100781 Hz  
SW 10.617 ppm  
FWD00 0°  
F2 - Processing parameters  
SI 32768  
SF 500.130164 MHz  
WDW EM  
SSB 0 Hz  
GB 0 Hz  
PC 1.40  
F1 - Processing parameters  
SI 1024  
SF 500.130164 MHz  
WDW EM  
SSB 0 Hz  
GB 0 Hz  
PC 1.40

Chemist Alessandro Del Grosso  
ADG298b  
HSQC.w CDCl<sub>3</sub> /opt/topspin3.2 ADG 34

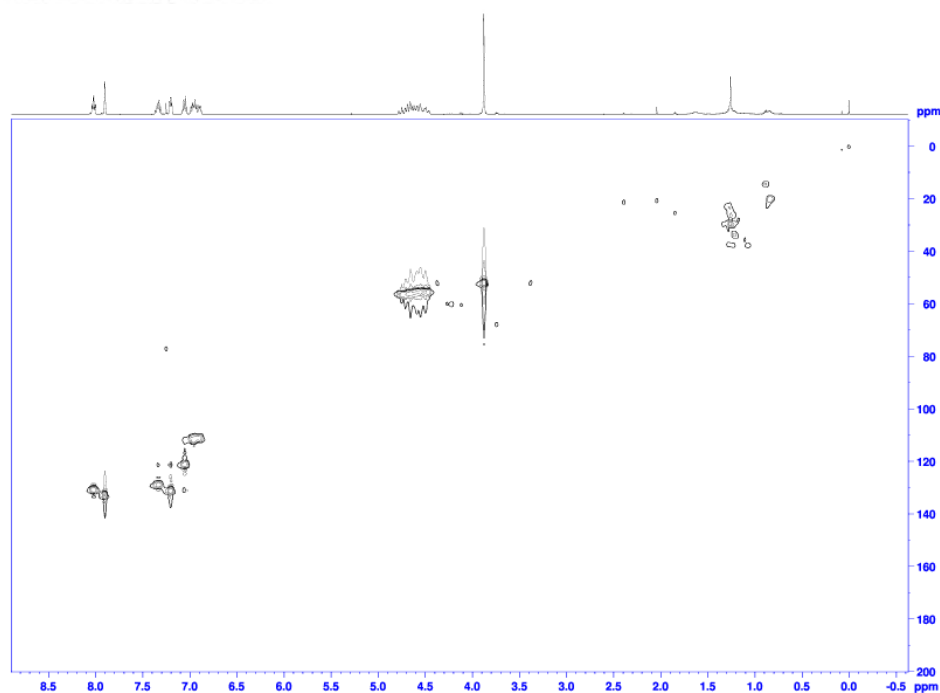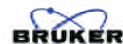

Current Data Parameters  
NAME Aug05-2016  
EXPNO 1  
PROCNO 1  
F2 - Acquisition Parameters  
Date\_ 20160805  
Time 8.46  
INSTRUM spect  
PROBHD 5 mm CPCH 13C  
PULPROG zgpg30  
TD 65536  
SOLVENT CDCl<sub>3</sub>  
NS 1  
DS 8  
SWH 4761.802 Hz  
FIDRES 4.632288 Hz  
AQ 0.1757000 sec  
RG 68.09  
RW 88.333 usec  
DC 40.00 usec  
TE 298.0 K  
D0 0.0000000 sec  
D1 1.4627440 sec  
D11 0.00172414 sec  
D12 0.0000000 sec  
D13 0.0000000 sec  
D14 0.0000000 sec  
D15 0.00019860 sec  
ZNG 0.00019860 sec  
===== CHANNEL f1 =====  
NUC1 13C  
P1 10.00 usec  
PL1 0.00 usec  
P12 13.00 usec  
PL12 13.0000000 W  
PL120 1.3344897 W  
===== CHANNEL f2 =====  
NUC2 13C  
P2 10.00 usec  
PL2 0.00 usec  
P22 13.00 usec  
PL22 13.0000000 W  
PL220 1.3344897 W  
===== GRADIENT CHANNEL =====  
GPRAM[1] RMSD10.100  
GPRAM[2] 10.00 %  
P16 1000.00 usec  
F1 - Acquisition parameters  
TD 128  
SFO1 125.769955 MHz  
FIDRES 206.479801 Hz  
SW 210.140 ppm  
FWD00 0°  
F2 - Processing parameters  
SI 32768  
SF 125.769955 MHz  
WDW EM  
SSB 0 Hz  
GB 0 Hz  
PC 1.40  
F1 - Processing parameters  
SI 1024  
SF 125.769955 MHz  
WDW EM  
SSB 0 Hz  
GB 0 Hz  
PC 1.40

Chemist Alessandro Del Grosso  
ADG298b  
HMBC.w CDC13 /opt/topspin3.2 ADG 34

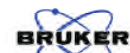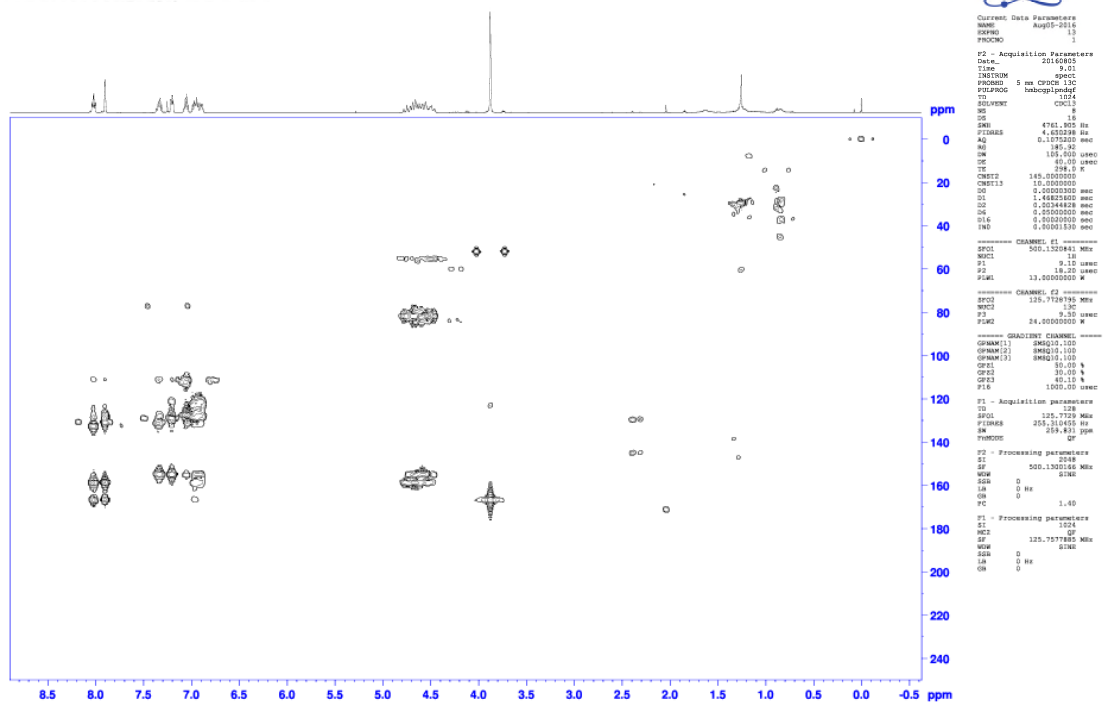

HRMS:

## Mass Spectrum SmartFormula Report

## Analysis Info

Analysis Name D:\Data\SongAug2016\ADG298b.d  
Method lowpositive.m  
Sample Name LS  
Comment

Acquisition Date 8/5/2016 1:00:16 PM

Operator Lijiang Song  
Instrument maXis plus 255552.00050

## Acquisition Parameter

|             |            |                      |          |                  |           |
|-------------|------------|----------------------|----------|------------------|-----------|
| Source Type | ESI        | Ion Polarity         | Positive | Set Nebulizer    | 0.5 Bar   |
| Focus       | Not active | Set Capillary        | 4000 V   | Set Dry Heater   | 180 °C    |
| Scan Begin  | 50 m/z     | Set End Plate Offset | -500 V   | Set Dry Gas      | 4.0 l/min |
| Scan End    | 2400 m/z   | Set Charging Voltage | 0 V      | Set Divert Valve | Source    |
|             |            | Set Corona           | 0 nA     | Set APCI Heater  | 0 °C      |

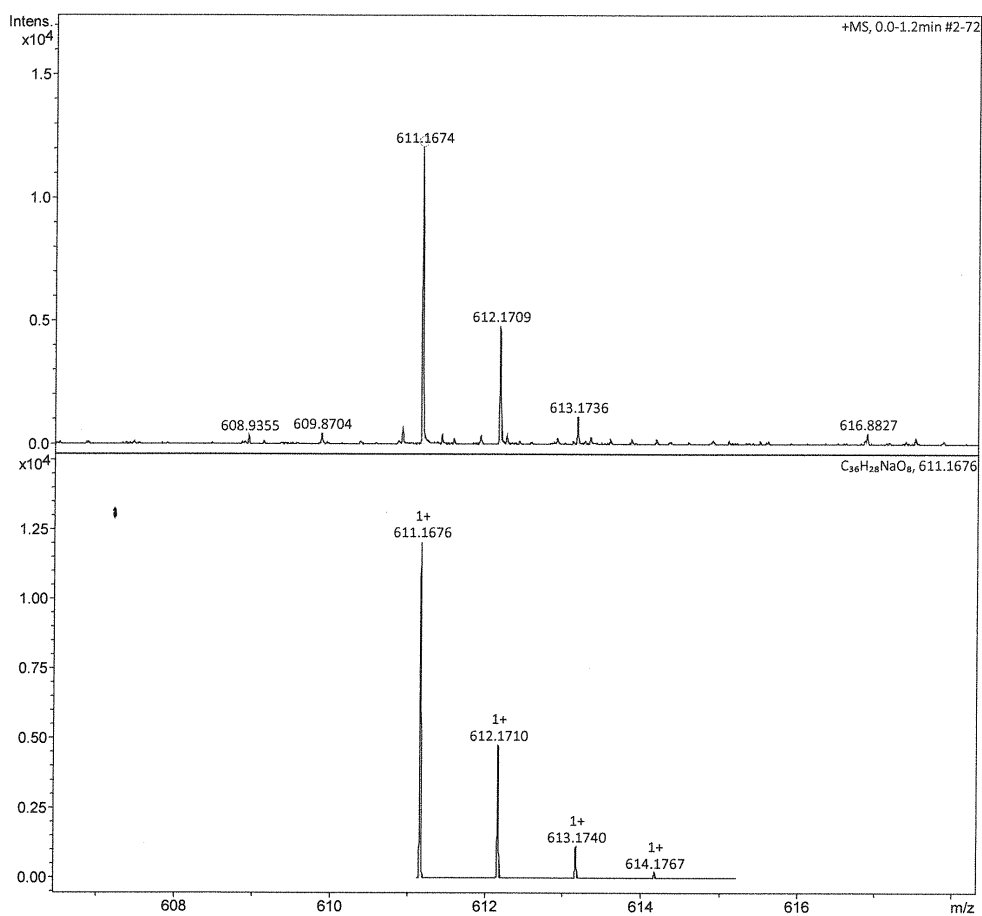

ADG298b.d

Bruker Compass DataAnalysis 4.2

printed: 8/5/2016 1:34:20 PM

by: Lijiang Song

Page 1 of 2

The 3+3 product NMRs are below (298c). The HRMS is also shown, to confirm the structure of the macrocycle:

$^1\text{H}$  NMR (500 MHz,  $\text{CDCl}_3$ ).

Chemist Alessandro Del Grosso  
ADG298c  
PROTON.w  $\text{CDCl}_3$  /opt/topspin3.2 ADG 35

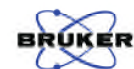

Current Data Parameters  
NAME Aug05-2016  
EXPNO 20  
PROCNO 1

F2 - Acquisition Parameters  
Date\_ 20160805  
Time 9.47  
INSTRUM spect  
PROBHD 5 mm CPDCH 13C  
PULPROG zg30  
TD 65536  
SOLVENT  $\text{CDCl}_3$   
NS 16  
DS 2  
SWH 10000.000 Hz  
FIDRES 0.132588 Hz  
AQ 3.2767999 sec  
RG 67.89  
DM 50.000 usec  
DE 40.00 usec  
TE 298.0 K  
D1 1.0000000 sec  
TD0 1

===== CHANNEL f1 =====  
SF01 500.1330865 MHz  
NUC1  $^1\text{H}$   
P1 9.10 usec  
PLM1 13.00000000 W

F2 - Processing parameters  
SI 65536  
SF 500.1300522 MHz  
WDW EM  
SSB 0  
LB 0.30 Hz  
GB 0  
PC 1.00

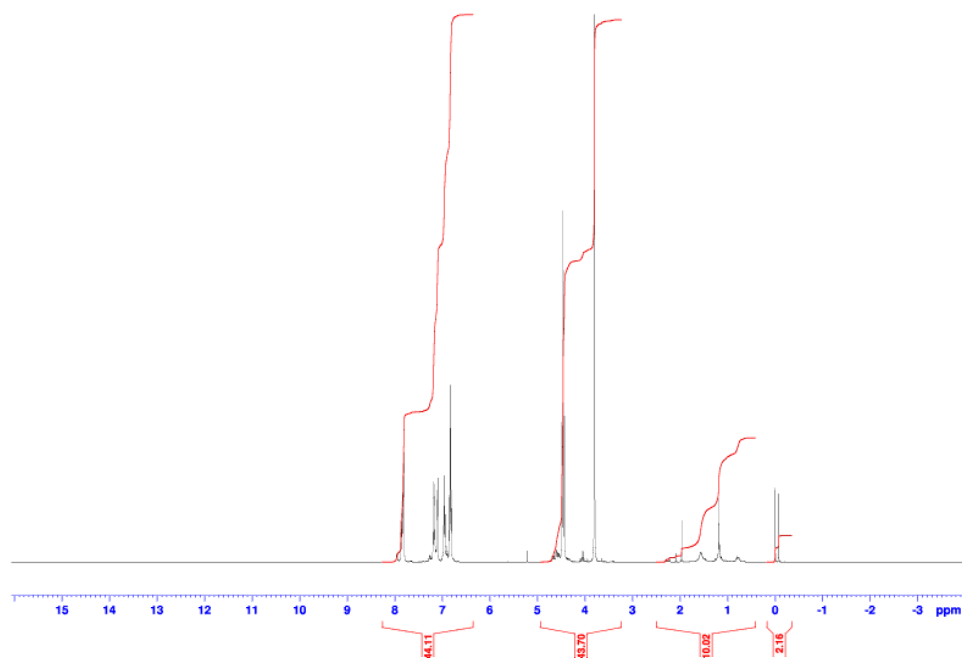

$^{13}\text{C}$  NMR (125 MHz,  $\text{CDCl}_3$ ).

Chemist Alessandro Del Grosso  
ADG298c  
C13APT.w CDC13 /opt/topspin3.2 ADG 35

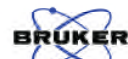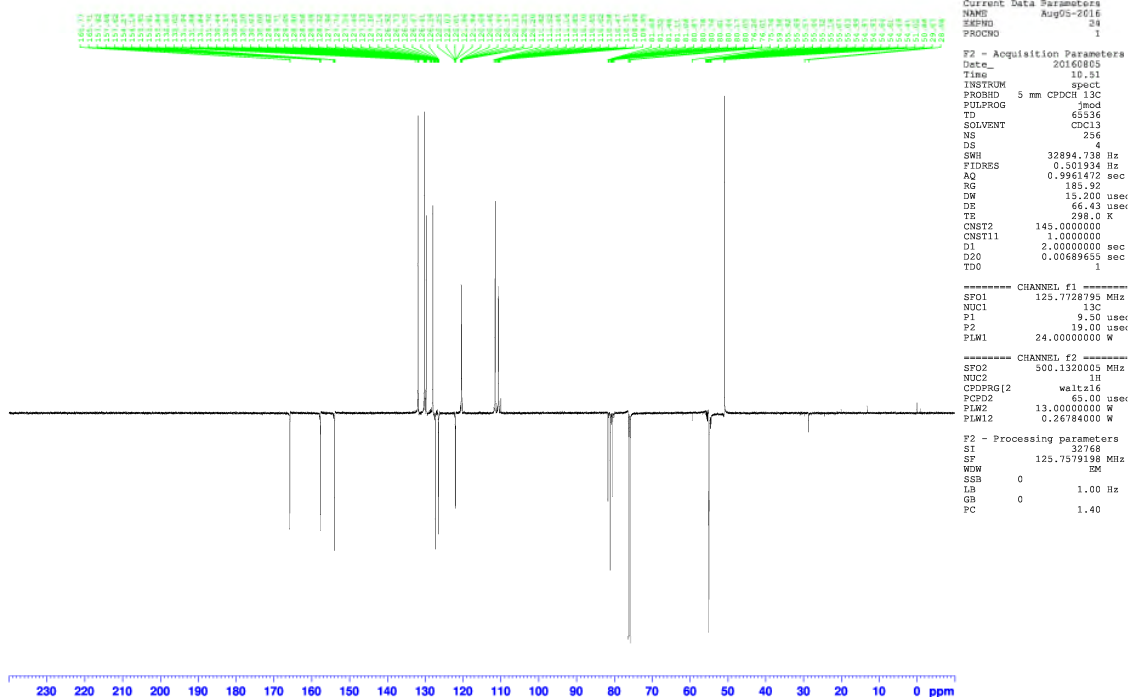

Chemist Alessandro Del Grosso  
ADG298c  
COSY.w CDC13 /opt/topspin3.2 ADG 35

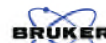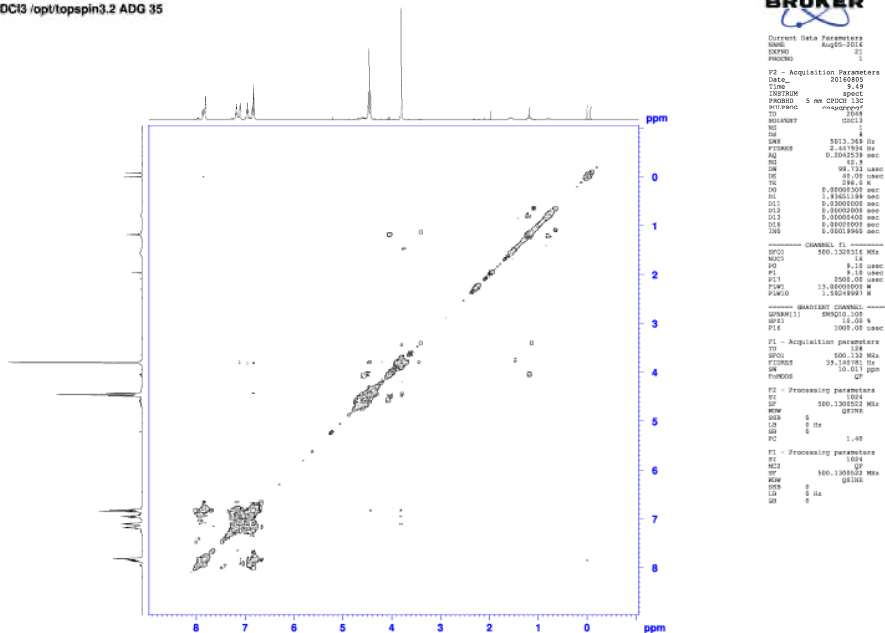

Chemist Alessandro Del Grosso  
ADG298c  
HSQC.w CDC13 /opt/topspin3.2 ADG 35

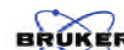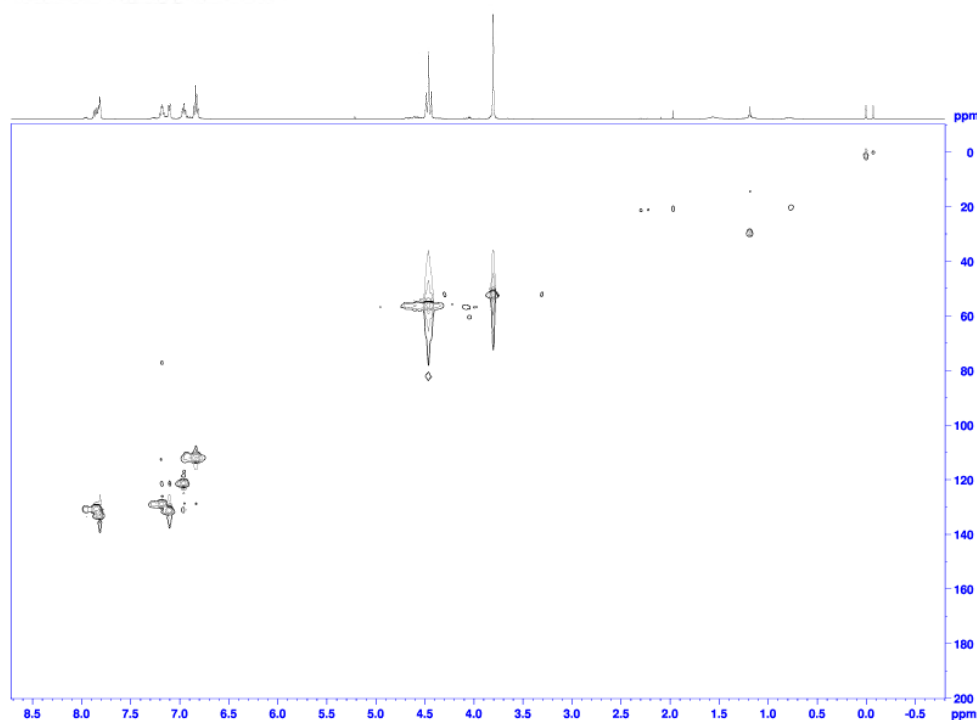

Current Data Parameters  
Name: ADG298c  
EXPNO: 2  
PROCNO: 1  
F2 - Acquisition Parameters  
Date\_: 20160805  
Time: 9.55  
INSTRUM: spect  
PROBHD: 5 mm CPQCH 13C  
PULPROG: zgpg30  
TD: 65536  
SOLVENT: CDCl3  
NS: 4  
DS: 16  
SWH: 4761.800 Hz  
FIDRES: 4.630298 Hz  
AQ: 0.1075100 sec  
RG: 381.32  
RW: 105.000 usec  
TE: 298.0 K  
CMT2: 145.000000 sec  
DQ: 0.00000000 sec  
D1: 1.40000000 sec  
D4: 0.00000000 sec  
D11: 0.03000000 sec  
D16: 0.00000000 sec  
INQ: 0.00000000 sec  
===== CHANNEL f1 =====  
NUC1: 13C  
P1: 12.00 usec  
P2: 18.00 usec  
PC1: 13.00000000 M  
===== CHANNEL f2 =====  
NUC2: 1H  
P3: 12.00 usec  
P4: 18.00 usec  
PC2: 13.00000000 M  
===== GRADIENT CHANNEL =====  
GPMAN[1]: SMC10.100  
GPMAN[2]: SMC10.100  
GPE1: 50.00 %  
GPE2: 50.00 %  
P16: 1000.00 usec  
F1 - Acquisition parameters  
TD: 65536  
SOLVENT: CDCl3  
PROBHD: 5 mm CPQCH 13C  
PULPROG: zgpg30  
F2 - Processing parameters  
SI: 32768  
SF: 500.1305322 MHz  
WDW: EM  
SSB: 0 Hz  
LB: 0 Hz  
GB: 0 Hz  
PC: 1.60  
F1 - Processing parameters  
SI: 32768  
SF: 125.7611875 MHz  
WDW: EM  
SSB: 0 Hz  
LB: 0 Hz  
GB: 0 Hz

HMBC.w CDC13 /opt/topspin3.2 ADG 35  
c

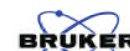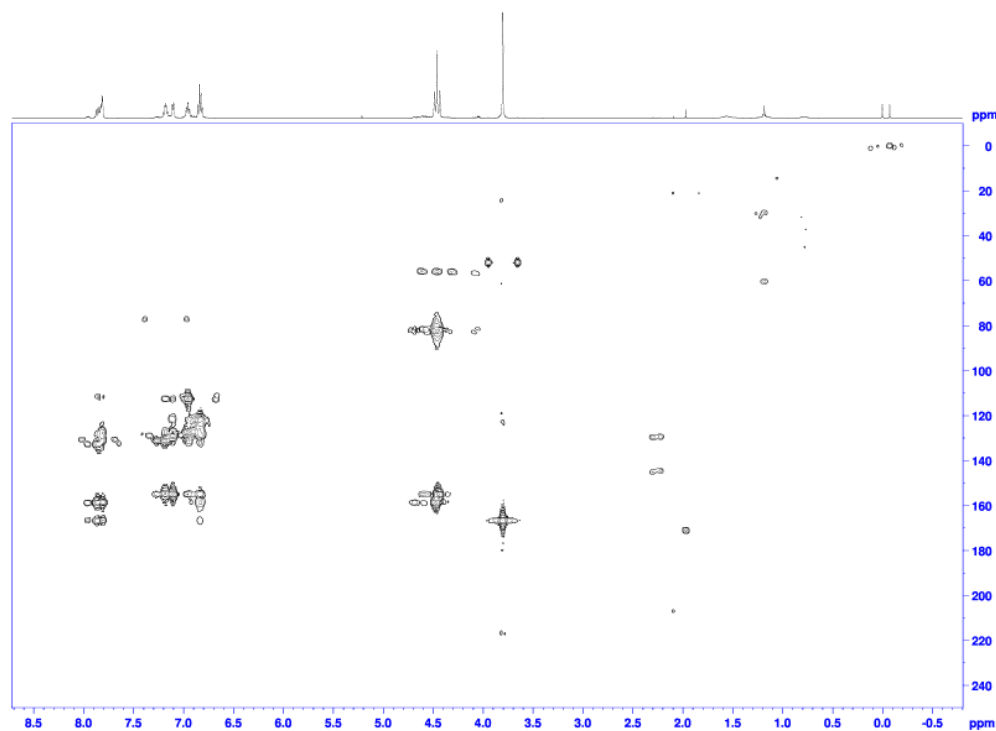

Current Data Parameters  
Name: ADG298c  
EXPNO: 2  
PROCNO: 1  
F2 - Acquisition Parameters  
Date\_: 20160805  
Time: 9.55  
INSTRUM: spect  
PROBHD: 5 mm CPQCH 13C  
PULPROG: zgpg30  
TD: 65536  
SOLVENT: CDCl3  
NS: 4  
DS: 16  
SWH: 4761.800 Hz  
FIDRES: 4.630298 Hz  
AQ: 0.1075100 sec  
RG: 381.32  
RW: 105.000 usec  
TE: 298.0 K  
CMT2: 145.000000 sec  
DQ: 0.00000000 sec  
D1: 1.40000000 sec  
D4: 0.00000000 sec  
D11: 0.03000000 sec  
D16: 0.00000000 sec  
INQ: 0.00000000 sec  
===== CHANNEL f1 =====  
NUC1: 13C  
P1: 12.00 usec  
P2: 18.00 usec  
PC1: 13.00000000 M  
===== CHANNEL f2 =====  
NUC2: 1H  
P3: 12.00 usec  
P4: 18.00 usec  
PC2: 13.00000000 M  
===== GRADIENT CHANNEL =====  
GPMAN[1]: SMC10.100  
GPMAN[2]: SMC10.100  
GPMAN[3]: SMC10.100  
GPE1: 50.00 %  
GPE2: 50.00 %  
GPE3: 50.00 %  
P16: 1000.00 usec  
F1 - Acquisition parameters  
TD: 65536  
SOLVENT: CDCl3  
PROBHD: 5 mm CPQCH 13C  
PULPROG: zgpg30  
F2 - Processing parameters  
SI: 32768  
SF: 500.1305322 MHz  
WDW: EM  
SSB: 0 Hz  
LB: 0 Hz  
GB: 0 Hz  
PC: 1.60  
F1 - Processing parameters  
SI: 32768  
SF: 125.7611875 MHz  
WDW: EM  
SSB: 0 Hz  
LB: 0 Hz  
GB: 0 Hz

HRMS:

## Mass Spectrum SmartFormula Report

### Analysis Info

Analysis Name D:\Data\SongAug2016\ADG298c.d  
 Method lowpositive.m  
 Sample Name LS  
 Comment

Acquisition Date 8/5/2016 1:01:35 PM

Operator Lijiang Song  
 Instrument maXis plus 255552.00050

### Acquisition Parameter

|             |            |                      |          |                  |           |
|-------------|------------|----------------------|----------|------------------|-----------|
| Source Type | ESI        | Ion Polarity         | Positive | Set Nebulizer    | 0.5 Bar   |
| Focus       | Not active | Set Capillary        | 4000 V   | Set Dry Heater   | 180 °C    |
| Scan Begin  | 50 m/z     | Set End Plate Offset | -500 V   | Set Dry Gas      | 4.0 l/min |
| Scan End    | 2400 m/z   | Set Charging Voltage | 0 V      | Set Divert Valve | Source    |
|             |            | Set Corona           | 0 nA     | Set APCI Heater  | 0 °C      |

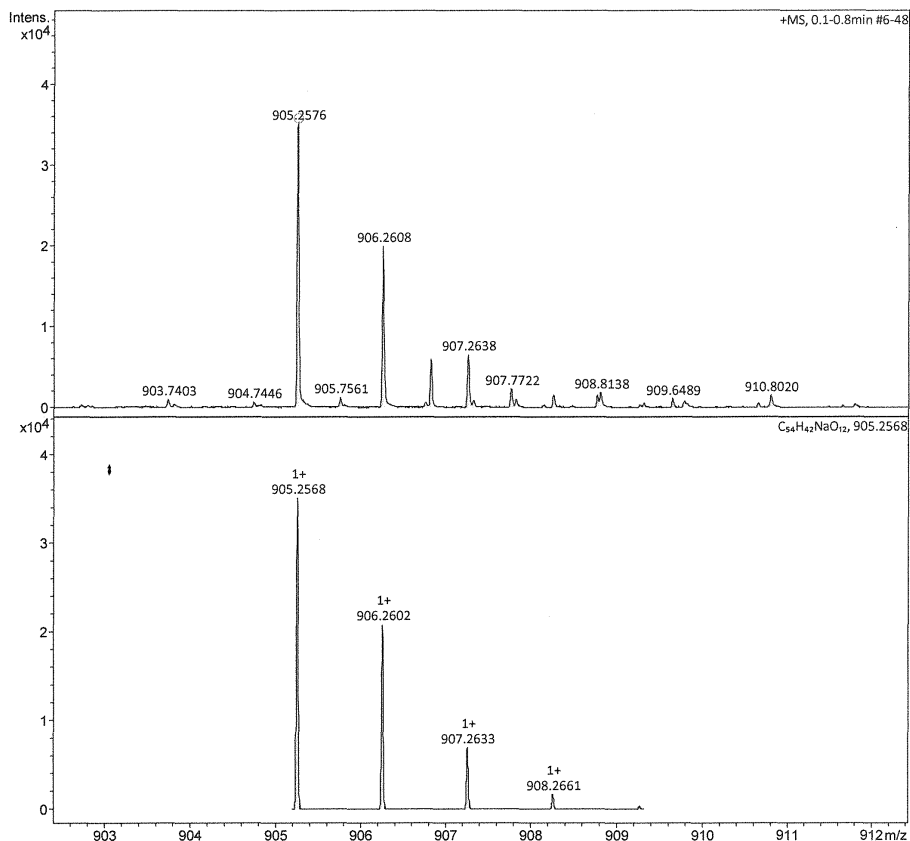

ADG298c.d

Bruker Compass DataAnalysis 4.2

printed: 8/5/2016 1:33:15 PM

by: Lijiang Song

Page 1 of 2

### Alternative procedure using butanone as solvent;

In a round bottom flask under nitrogen atmosphere, methyl 2',6-dihydroxy-[1,1'-biphenyl]-3-carboxylate (500 mg, 2.05 mmol) and but-2-yne-1,4-diyl bis(4-methylbenzenesulfonate) (808 mg, 2.05 mmol) were dissolved in butan-2-one (102 mL). The mixture was degassed and heated to 80 °C for 5 days. After this time the solvent was removed under reduced pressure. The resulting oil was dissolved in DCM

(50 mL) and washed with water (100 mL). The aqueous phase was extracted with DCM (2 x 50 mL). The combined organic extracts were dried over magnesium sulphate, filtered and the DCM was evaporated under reduced pressure. The product was purified by column chromatography, (eluent hexane to hexane/ethyl acetate 88:12) to obtain the product as a white solid (193 mg, 0.656 mmol, 32 %). The data for the product matched that reported above.

**Synthesis of Compound 13;** 8,13-dioxatricyclo[12.4.0.0<sup>2,7</sup>]octadeca-1(18),2(7),3,5,14,16-hexaen-10-yne-4-carboxylic acid **13**.

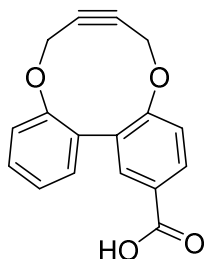

In a round bottom flask, methyl 8,13-dioxatricyclo[12.4.0.0<sup>2,7</sup>]octadeca-1(18),2(7),3,5,14,16-hexaen-10-yne-4-carboxylate **11** (100 mg, 0.325 mmol) was dissolved in 1:1 MeOH/H<sub>2</sub>O (3 mL). NaOH (26 mg, 0.65 mmol) was added. The mixture was refluxed at 100 °C overnight. The mixture was acidified at pH ≈ 5 by adding 0.5 M HCl dropwise. The organic fractions were extracted with ethyl acetate (4 x 20 mL). The combined organic extracts were washed with saturated sodium chloride solution and then were dried over sodium sulphate. The solution was filtered and the solvent removed under reduced pressure to yield the product **13** as a white solid (88 mg, 0.315 mmol, 97 %).

m.p. 176.0 °C dec.

IR<sub>(neat)</sub> 2955, 2921, 2852, 1681, 1607, 1597, 1579, 1499, 1476, 1446, 1423, 1399, 1348, 1310, 1272, 1249, 1191 cm<sup>-1</sup>.

m/z (ESI) [M + H]<sup>+</sup>, 428.1; [M + Na]<sup>+</sup>, 303.0

δ<sub>H</sub> (500 MHz, d<sub>6</sub>-Acetone) δ = 8.07 (1H, dd, *J* = 8.5, 2.0 Hz, *ArH*), 7.86 (1H, d, *J* = 2.1 Hz, *ArH*), 7.39 - 7.46 (1H, m, *ArH*), 7.37 (1H, d, *J* = 8.4 Hz, *ArH*), 7.28 (1H, d, *J*



= 8.1, 0, ArH), 7.13 - 7.25 (2H, m, ArH), 5.30 (1H, br. s., OH), 4.36 - 4.64 (4H, m, CH<sub>2</sub>).

$\delta_C$  (125 MHz, *d*<sub>6</sub>-Acetone)  $\delta$  = 168.1 (C), 159.7 (C), 155.9 (C), 137.0 (C), 136.2 (C), 134.5 (CH), 132.7 (CH), 131.6 (CH), 130.4 (CH), 128.1 (C), 124.9 (CH), 123.9 (CH), 123.8 (CH), 88.1(C), 87.3(C), 64.2(CH<sub>2</sub>), 64.0 (CH<sub>2</sub>).

*m/z* (ESI) 303.0 ([M + Na]<sup>+</sup>, 100%).

HRMS (ESI-Q-TOF) *m/z*: [M + Na]<sup>+</sup> Calcd for C<sub>17</sub>H<sub>12</sub>NaO<sub>4</sub> 303.0628; Found 303.0627.

<sup>1</sup>H NMR (500 MHz, *d*<sub>6</sub>-Acetone)

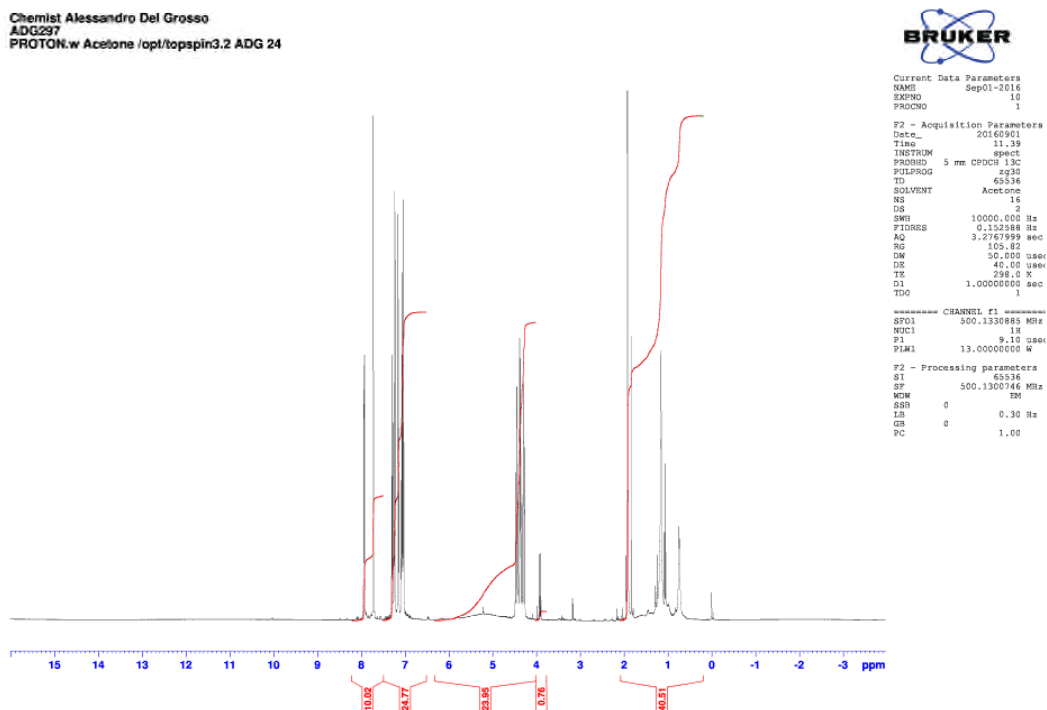

<sup>13</sup>C NMR (125 MHz, *d*<sub>6</sub>-Acetone)

Chemist Alessandro Del Grosso  
ADG297

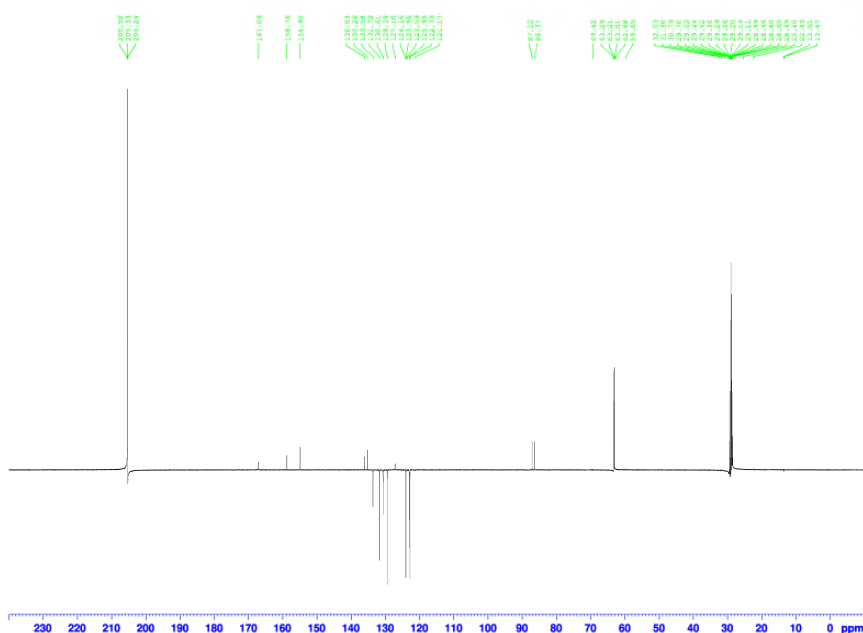[illegible]

Chemist Alessandro Del Grosso  
ADG297  
COSY.w Acetone /opt/topspin3.2 ADG 24

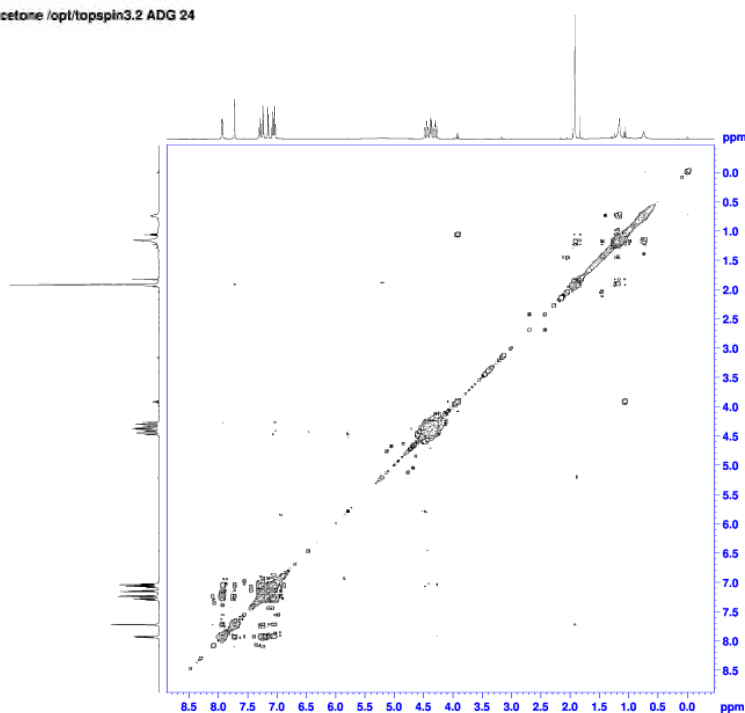

```

BRUKER

Current Date Parameters
=====
EXPNO      1
PROCNO     1
EXPRES      1
F2 - Processing parameters
=====
INSTRUM      spect
PULPROG      zgpg
MAGNET      500
NUC1          13
NUC2          C
SOLVENT      ACETONE
=====
SI
SI
SI      4672.897 Hz
FIDRES    0.131450 Hz
AQ      1.571340 sec
SI
SI      107.000000 sec
SI
SI      2.900000 sec
TE      298.15 K
D1      0.0000000000 sec
D2      0.0000000000 sec
D3      0.0000000000 sec
D4      0.0000000000 sec
D5      0.0000000000 sec
D6      0.0000000000 sec
D7      0.0000000000 sec
===== CHANNEL f1 =====
NUC1          13
NUC2          C
P1      9.10 sec
P2      1.75 sec
P3      2500.000000 sec
P4      13.0000000000 sec
P5      0.0000000000 sec
===== CHANNEL f2 =====
GRABF1      0.0000000000 sec
===== CHANNEL f3 =====
SI
SI
SI      1000.000000 sec
F2 - Acquisition parameters
=====
INSTRUM      spect
PULPROG      zgpg
MAGNET      500
NUC1          13
NUC2          C
SOLVENT      ACETONE
=====
SI
SI
SI      467.2897 MHz
FIDRES    0.131450 Hz
AQ      1.571340 sec
TE      298.15 K
D1      0.0000000000 sec
D2      0.0000000000 sec
D3      0.0000000000 sec
D4      0.0000000000 sec
D5      0.0000000000 sec
D6      0.0000000000 sec
D7      0.0000000000 sec
===== CHANNEL f1 =====
NUC1          13
NUC2          C
P1      9.1000000000 sec
P2      1.7500000000 sec
P3      2500.000000 sec
P4      13.0000000000 sec
P5      0.0000000000 sec
===== CHANNEL f2 =====
GRABF1      0.0000000000 sec
===== CHANNEL f3 =====
SI
SI
SI      1000.000000 sec
F2 - Processing parameters
=====
INSTRUM      spect
PULPROG      zgpg
MAGNET      500
NUC1          13
NUC2          C
SOLVENT      ACETONE
=====
SI
SI
SI      467.2897 MHz
FIDRES    0.131450 Hz
AQ      1.571340 sec
TE      298.15 K
D1      0.0000000000 sec
D2      0.0000000000 sec
D3      0.0000000000 sec
D4      0.0000000000 sec
D5      0.0000000000 sec
D6      0.0000000000 sec
D7      0.0000000000 sec
===== CHANNEL f1 =====
NUC1          13
NUC2          C
P1      9.1000000000 sec
P2      1.7500000000 sec
P3      2500.000000 sec
P4      13.0000000000 sec
P5      0.0000000000 sec
===== CHANNEL f2 =====
GRABF1      0.0000000000 sec
===== CHANNEL f3 =====
SI
SI
SI      1000.000000 sec

```

Chemist Alessandro Del Grosso  
ADG297  
HSQC.w Acetone /opt/topspin3.2 ADG 24

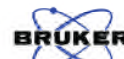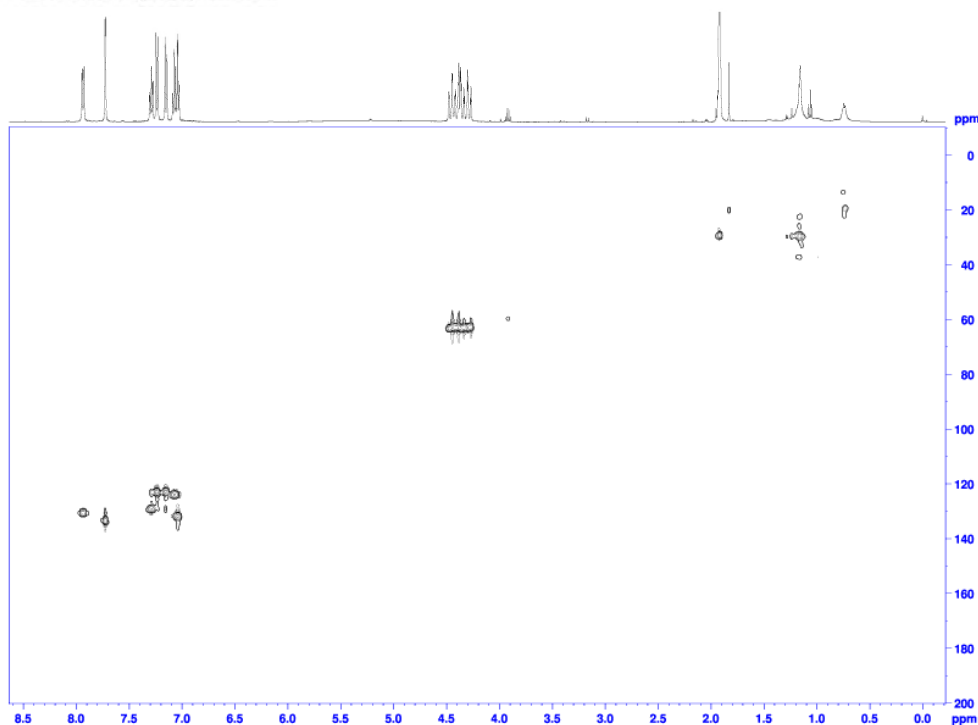

HMBC.w Acetone /opt/topspin3.2 ADG 24

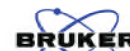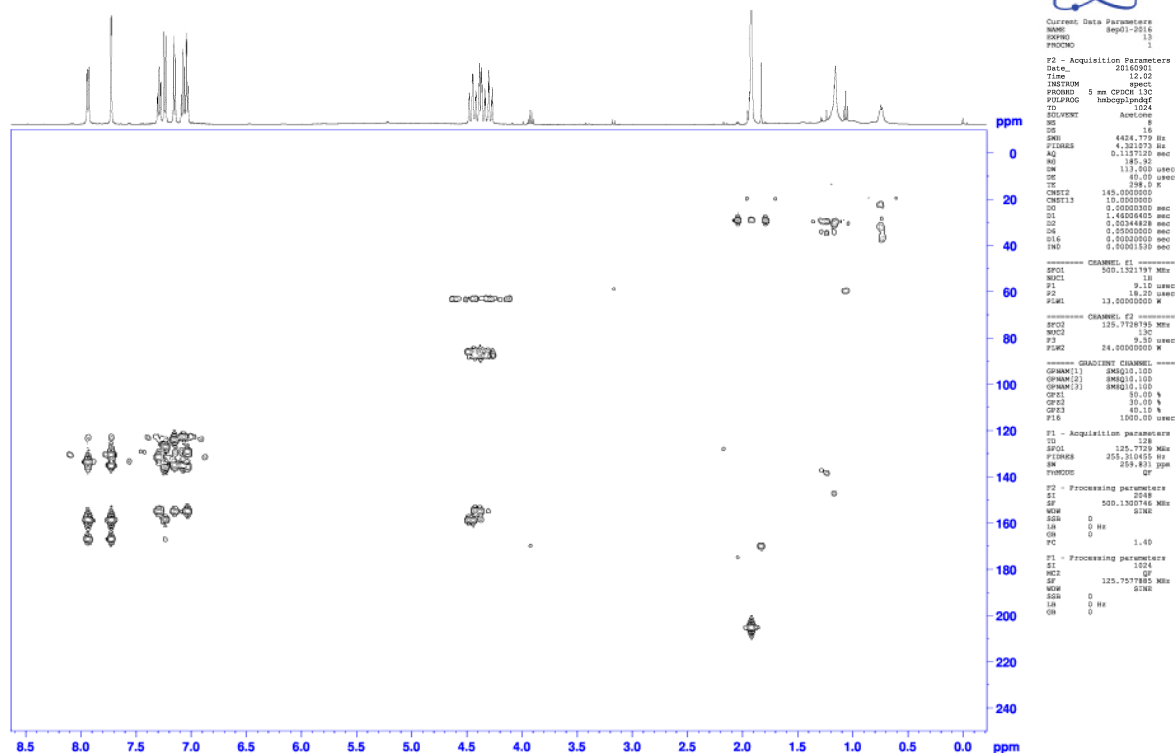

**Synthesis of Activated ester **14**; 5-dioxopyrrolidin-1-yl 8,13-dioxatricyclo[12.4.0.0<sup>2,7</sup>]octadeca-1(14),2(7),3,5,15,17-hexaen-10-yne-4-carboxylate **14**.**

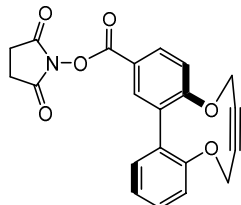

In a round bottom flask, a solution of compound **13** (82 mg, 0.29 mmol) in dry DCM (1.2 mL) N-hydroxysuccinimide (54 mg, 0.464 mmol) and EDC.HCl (67 mg, 0.348 mmol) were added and the mixture was stirred overnight at room temperature. The reaction mixture was extracted with diethyl ether (2 x 20 mL), washed twice with water (2 x 20 mL) and saturated sodium chloride solution (20 mL). After drying of the organic phase over sodium sulphate and filtration, the solvents were evaporated under reduced pressure. The product was purified by column chromatography (eluent: Hexane to Hexane/Ethyl acetate 80:20) to obtain the product **14** as a white solid (63.1 mg, 0.167 mmol, 55 %).

Mp: 220-223 °C.

(found (ESI):  $M^+ + Na$ ,  $C_{21}H_{15}NO_6Na$  requires M, 400.0752 (0.5 ppm error)).

$IR_{(neat)}$  1734, 1189, 1066, 963, 729  $cm^{-1}$ .

$\delta_H$  ( $CDCl_3$ , 500 MHz) 8.08 (1H, dd,  $J$  9.0, 2.0, ArH), 7.96 (1H, d,  $J$  2.0, ArH), 7.33 (1H, dt,  $J$  8.0, 2.0, ArH), 7.22 (1H, d,  $J$  8.5, ArH), 7.15-7.08 (3H, m, ArH), 4.57-5.46 (2H, m,  $OCH_2$ ), 4.34-4.24 (1H, m,  $OCH_2$ ), 2.82 (4H, brs,  $CH_2CH_2$ ).

$\delta_C$  ( $CDCl_3$ , 125 MHz) 168.3 (C), 160.3 (C), 159.4 (C), 153.4 (C), 135.9 (C), 133.9 (CH), 133.3 (C), 130.7 (CH), 130.6 (CH), 128.7 (CH), 123.3 (CH), 122.5 (CH), 121.7 (CH), 120.0 (C), 86.5 (C triple), 84.8 (C triple), 62.9 ( $OCH_2$ ), 62.4 ( $OCH_2$ ), 24.6 ( $CH_2CH_2$ ).

$m/z$  (ESI) 400.1 ( $M^+ + Na$ , 100%).

HRMS (ESI-Q-TOF)  $m/z$ :  $[M + Na]^+$  Calcd for  $C_{21}H_{15}NO_6Na$  400.0752; Found 400.0790.

<sup>1</sup>H NMR (CDCl<sub>3</sub>, 500MHz)

Chemist Laurentis Galanopoulos  
LG009/500  
PROTON.w CDC13 /opt/topspin3.2 LG 58

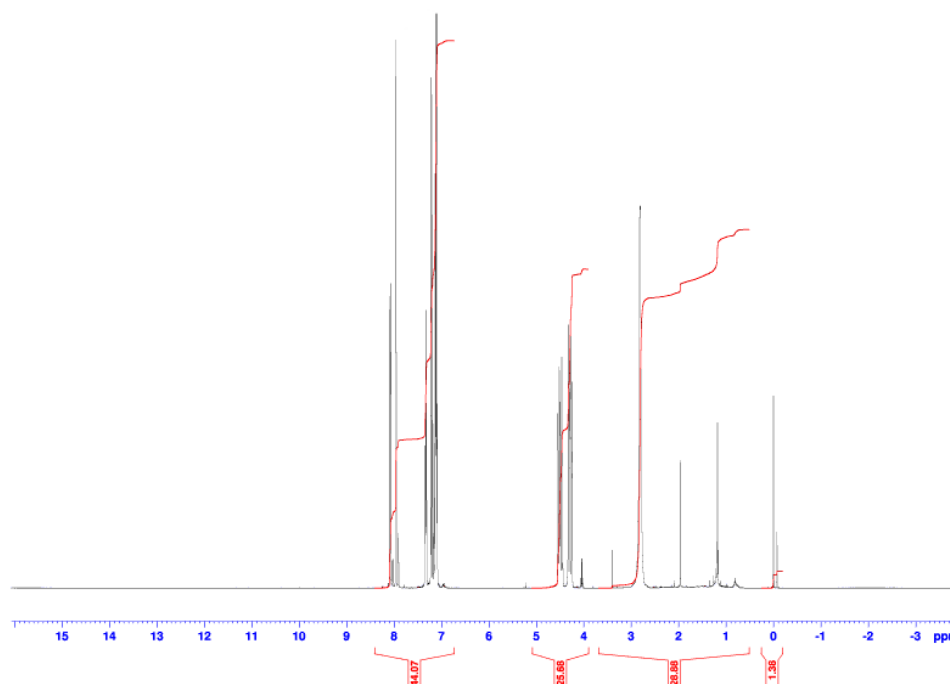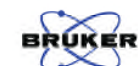

```

Current Data Parameters
NAME          May25-2016
EXPNO        10
PROCNO       1

F2 - Acquisition Parameters
Date_         20160525
Time          14.29
INSTRUM       spect
PROBHD        5 mm CPDCH 13C
PULPROG       zgpg30
SFO1          125
TD            65336
DS            CDCl3
NS            1
DS           10000.000 Hz
FIDRES        0.1259896 Hz
AQ            3.2767999 sec
RG            67.89
DE            30.000 uSec
DM            0.000 uSec
TE          298.0 K
DQ            1.00000000 sec
T0            1

===== CHANNEL f1 =====
SF01          500.1303888 MHz
NUC1           13
P1            9.10 usec
PL1          13.00000000 dB

F2 - Processing parameters
SI            65336
SF            500.1303888 MHz
WDW           EM
SSB           0
GB            0.30 Hz
L3            0
GB            0
PC            1.00

```

 $^{13}\text{C}$  NMR ( $\text{CDCl}_3$ , 125 MHz).

Chemist Lavrentis Galanopoulos  
LG09/500  
C13APT.w CDCI3 /opt/topspin3.2 LG 58

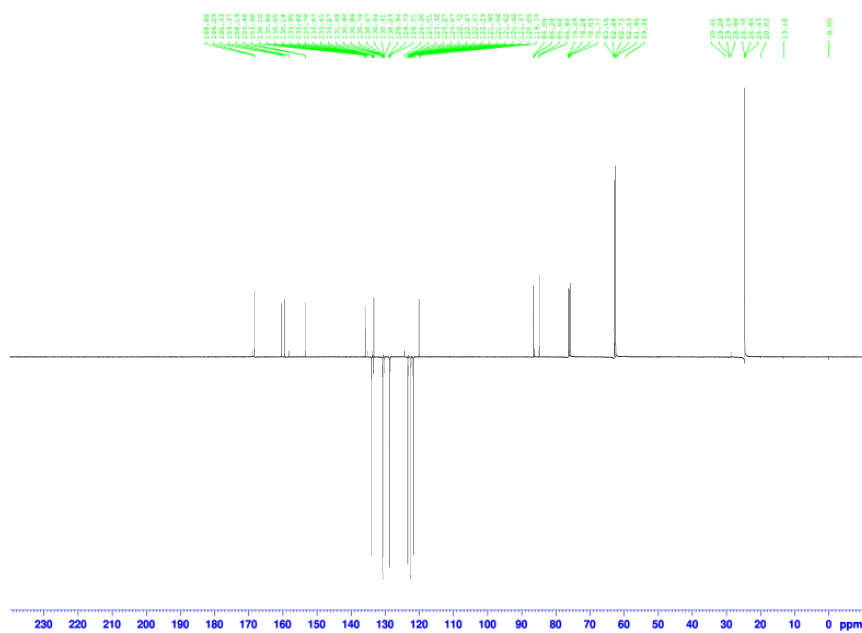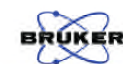

```
Current Data Parameters
NAME          May25-2016
EXPNO         11
PROCNO        1

F2 - Acquisition Parameters
Date_         20160523
Time          17.48
INSTRUM       spect
PROBHD        5 mm CPMX 1H/13
PULPRG        zgpg30
TD            65536
AQ            0.9462 sec
RG            256
SOLVENT       DMSO
NS           256
DS            4
SWH           32894.788 Hz
FIDRES       0.301934 Hz
AQRES        0.9462 sec
RG           185.92
WDW           EM
SSB           0
GB            66.43 uHz
PC           128
CST2          145.000000 MHz
CNTRL1       1
DQ1           2.000000000 sec
DQ2           0.00689653 sec
TDS           1

===== CHANNEL f2 =====
SF01         CHANNEL f2 72789.75 MHz
NUC1          13C
NUC2          13C
PC1           19.00 uSec
P1M1         24.000000000 mSec

===== CHANNEL f2 =====
SF02         CHANNEL f2 101.625 MHz
CPROG2        zgpg30
PCPD2         65.10 uSec
P1M2         13.000000000 mSec
P1M2         0.267840000 mSec

F2 - Processing parameters
SI             32768
SF            125.7591937 MHz
GB            0
WDW           RM
LS            0
GB            0
PC            1.40
```

Chemist Lavrentis Galanopoulos  
LG009/500  
HSQC.w CDCI3 /opt/topspin3.2 LG 58

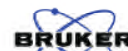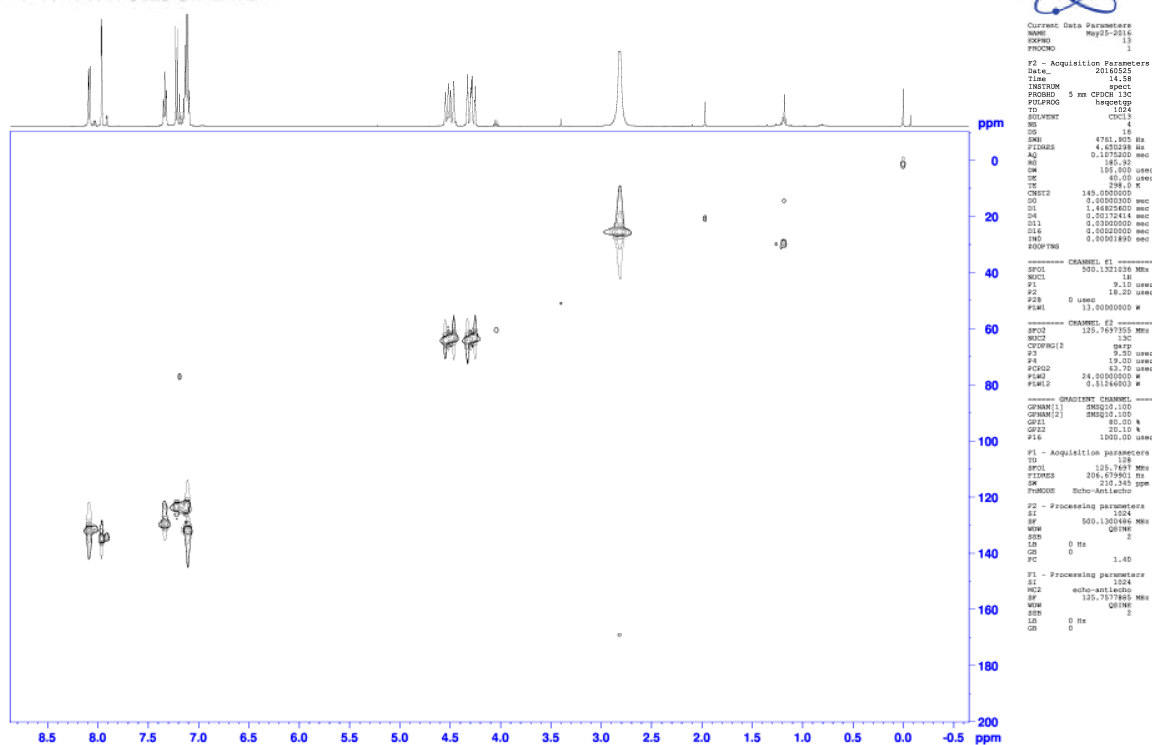

HMBC.w CDCI3 /opt/topspin3.2 LG 58  
9/500

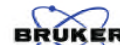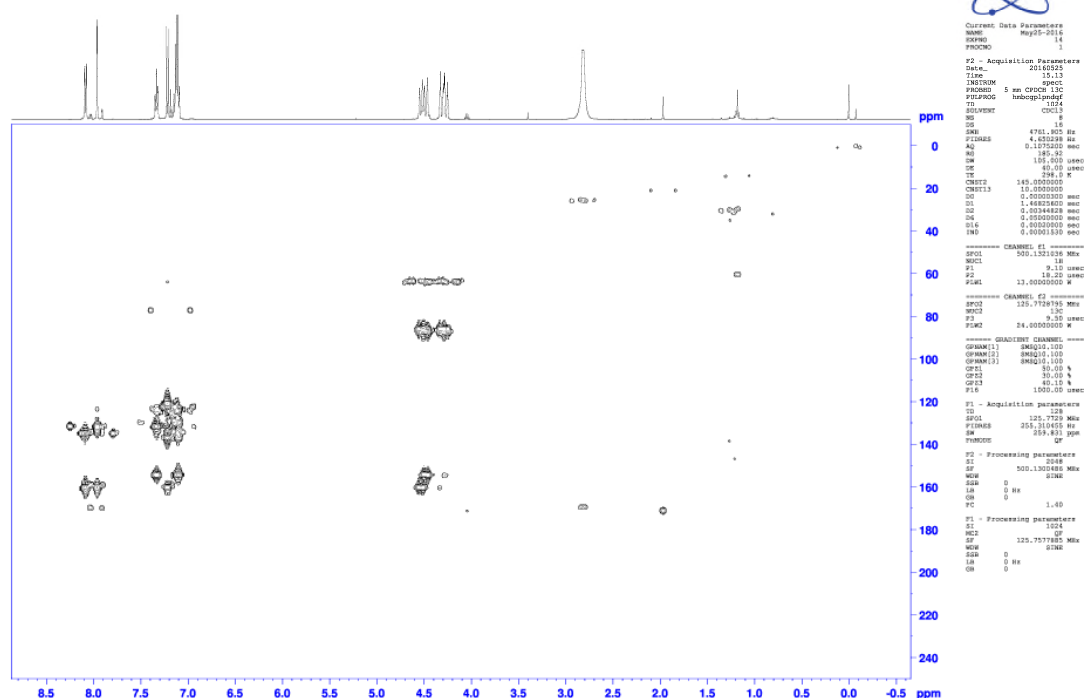

Chemist Lavrentis Galanopoulos  
LG009-500  
COSY.w CDCl3 /opt/topspin3.2 LG 58

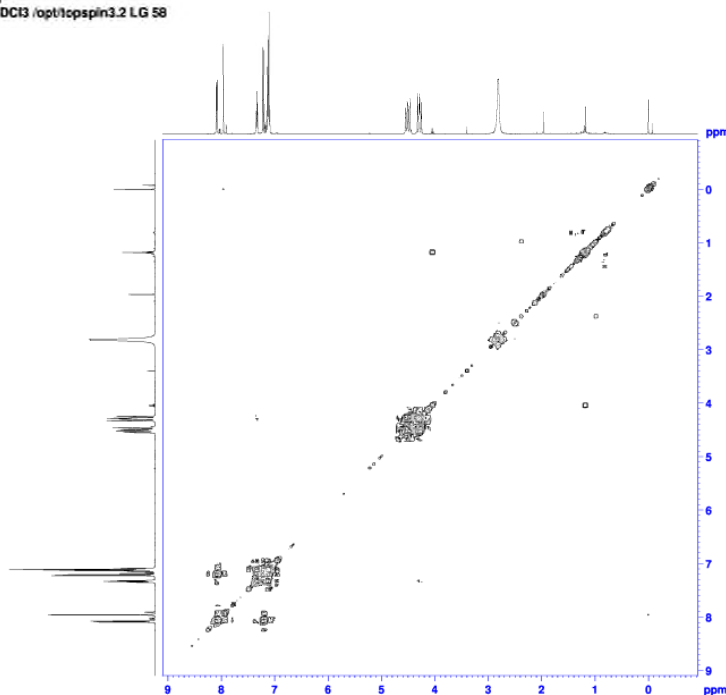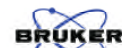

Current Data Parameters  
NAME May15-2016  
EXPNO 71  
PROCNO 1  
F2 - Acquisition Parameters  
Date\_ 20160523  
Time 20:49  
INSTRUM spect  
PROBHD 5 mm QNPCH 13  
PULPROG zgpg30  
TD 65536  
SOLVENT CDCl3  
NS 1  
DS 4  
SWH 5013.369 Hz  
FIDRES 2.447834 Hz  
AQ 0.3052335 sec  
RG 431  
RW 89.133 usec  
DE 90.00 usec  
TE 300.2 K  
D1 0.0000200 sec  
D11 1.9365139 sec  
D12 0.0000200 sec  
D13 0.0000200 sec  
D16 0.0002000 sec  
D18 0.0002000 sec  
D20 0.0001890 sec  
===== CHANNEL f1 =====  
NUC1 13C  
P1 9.10 usec  
PL1 0.00 usec  
PL2 0.00 usec  
PL3 0.00 usec  
PL4 0.00 usec  
PL5 0.00 usec  
PL6 0.00 usec  
PL7 0.00 usec  
PL8 0.00 usec  
PL9 0.00 usec  
PL10 0.00 usec  
PL11 0.00 usec  
PL12 0.00 usec  
PL13 0.00 usec  
PL14 0.00 usec  
PL15 0.00 usec  
PL16 0.00 usec  
PL17 0.00 usec  
PL18 0.00 usec  
PL19 0.00 usec  
PL20 0.00 usec  
===== BRAGGIO CHANNEL =====  
SPINPROG 1  
SFO1 500.130487 MHz  
SFO2 125.760370 MHz  
SFO3 101.626181 MHz  
SFO4 75.261818 MHz  
SFO5 50.761818 MHz  
SFO6 25.380909 MHz  
SFO7 12.690454 MHz  
SFO8 6.345227 MHz  
SFO9 3.172613 MHz  
SFO10 1.586306 MHz  
SFO11 0.793153 MHz  
SFO12 0.396576 MHz  
SFO13 0.198288 MHz  
SFO14 0.099144 MHz  
SFO15 0.049572 MHz  
SFO16 0.024786 MHz  
SFO17 0.012393 MHz  
SFO18 0.006196 MHz  
SFO19 0.003098 MHz  
SFO20 0.001549 MHz  
===== F1 - Acquisition parameters =====  
TD 65536  
SFO1 500.130487 MHz  
FIDRES 2.447834 Hz  
SWH 5013.369 Hz  
F2 - Processing parameters  
SI 32768  
SF 500.130487 MHz  
WDW EM  
SSB 0  
GB 0  
PC 1.40  
F1 - Processing parameters  
SI 32768  
SF 500.130487 MHz  
WDW EM  
SSB 0  
GB 0  
PC 1.40

**Synthesis of compound 9;** 13-phenyl-8,11,16-trioxa-12-azatetracyclo[15.4.0.0<sup>2,7</sup>.0<sup>10,14</sup>]henicosa-1(17),2,4,6,10(14),12,18,20-octaene **9**.

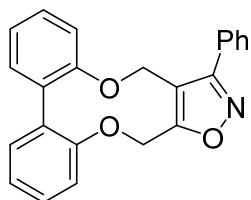

A mixture of strained alkyne **1** (50 mg, 0.21 mmol) and PhC(Cl)NOH (39 mg, 0.25 mmol) was stirred in DMF (0.5 mL) in the presence of 4Å MS (350 mg) for 3 days at rt. At the end of this time water (10 mL) and EtOAc (10 mL) were added and the organic layer was separated. The water layer was extracted with EtOAc (2 x 20 mL) and the combined organic layers were washed with water (3 x 20 mL). The solvent was removed to leave a crude product which was purified by chromatography on silica gel (hexane/EtOAc gradient) to give the product **9** as a clear oil (33 mg, 0.842 mmol, 40%).

The Product was below the strained alkyne by TLC; 4/1 hexane/EtOAc, silica gel, product R<sub>f</sub> 0.30, alkyne R<sub>f</sub> 0.60, visualised by uv and KMnO<sub>4</sub>.

IR<sub>(neat)</sub> 1460, 1440, 1257, 1188, 1104, 837, 751, 725, 696 cm<sup>-1</sup>;

$\delta_{\text{H}}$  (500 MHz, CDCl<sub>3</sub>) 7.65-7.58 (2H, m, ArH), 7.54-6.45 (3H, m, ArH), 7.35-7.24 (4H, m, ArH), 7.18-7.07 (3H, m, ArH), 6.93 (1H, d,  $J=8.5$ , ArH), 5.52 (1H, d,  $J=13.5$ , CHH), 5.35 (1H, d,  $J=13.5$ , CHH), 5.23 (1H, d,  $J=13.5$ , CHH), 5.07 (1H, d,  $J=13.5$ , CHH). COSY, HSQC,

$\delta_{\text{C}}$  (120 MHz, CDCl<sub>3</sub>) 168.9 (C), 162.7 (C), 157.0 (C), 155.5 (C), 131.0 (CH), 130.66 (CH), 130.5 (C), 130.1 (C), 130.0 (CH), 129.0 (CH), 128.9 (CH), 128.9 (CH), 128.55 (CH), 128.2 (C), 123.0 (CH), 122.9 (CH), 116.0 (CH), 113.7 (CH), 113.6 (C), 62.0 (CH<sub>2</sub>), 61.8 (CH<sub>2</sub>)..

$m/z$  (ESI+) 356.1 (M<sup>+</sup> + H, 45%), 378.1 (M<sup>+</sup> + Na, 100%).

HRMS (ESI-Q-TOF)  $m/z$ : [M + Na]<sup>+</sup> Calcd for C<sub>23</sub>H<sub>17</sub>NO<sub>3</sub>Na 378.1101; Found 378.1105.

<sup>1</sup>H NMR (500 MHz, CDCl<sub>3</sub>)

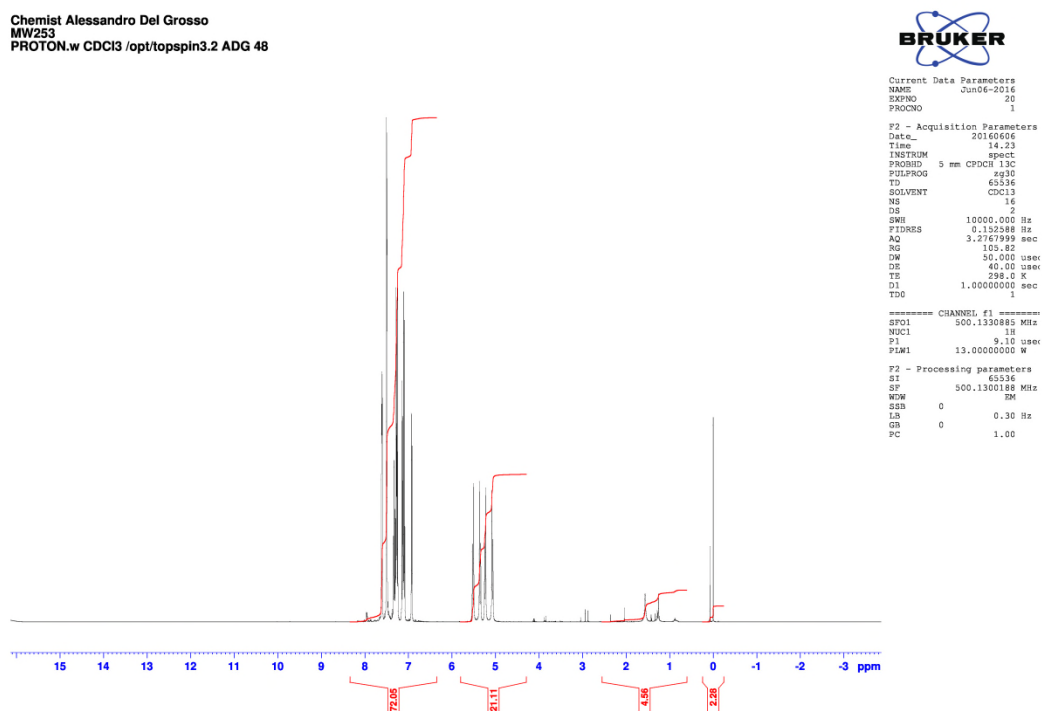

<sup>13</sup>C NMR (125 MHz, CDCl<sub>3</sub>)



C13APT.w CDCI3 /opt/topspin3.2 ADG 48

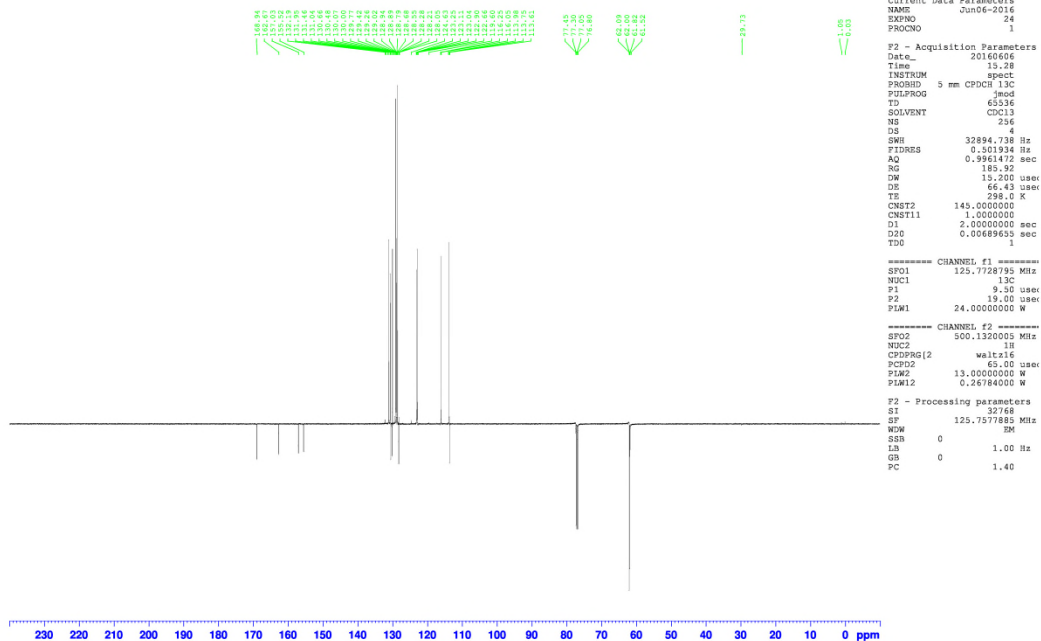Chemist Alessandro Del Grosso  
MW253  
COSY.w CDCI3 /opt/topspin3.2 ADG 48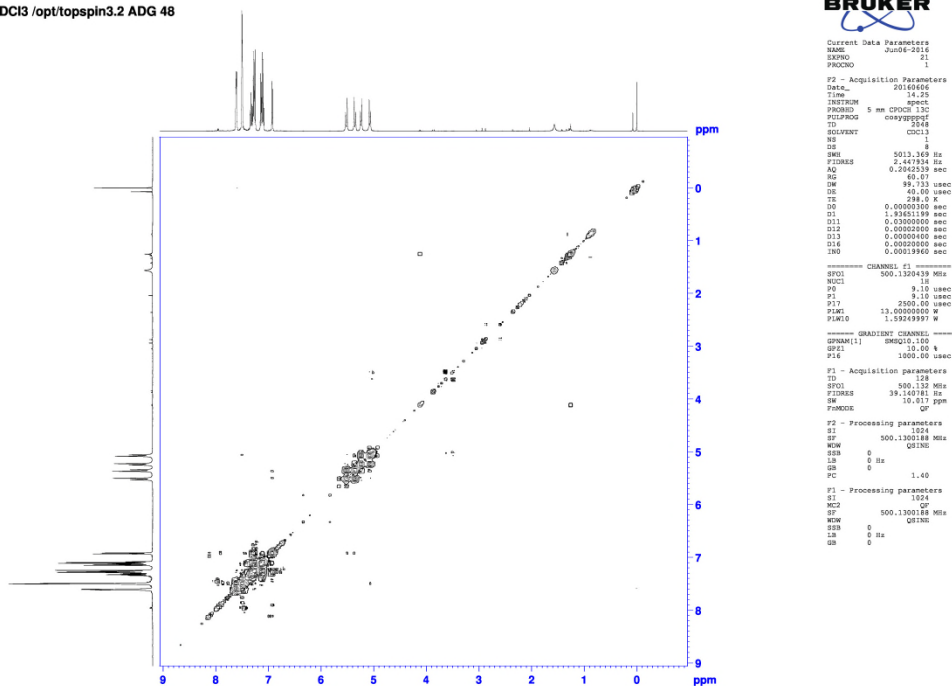

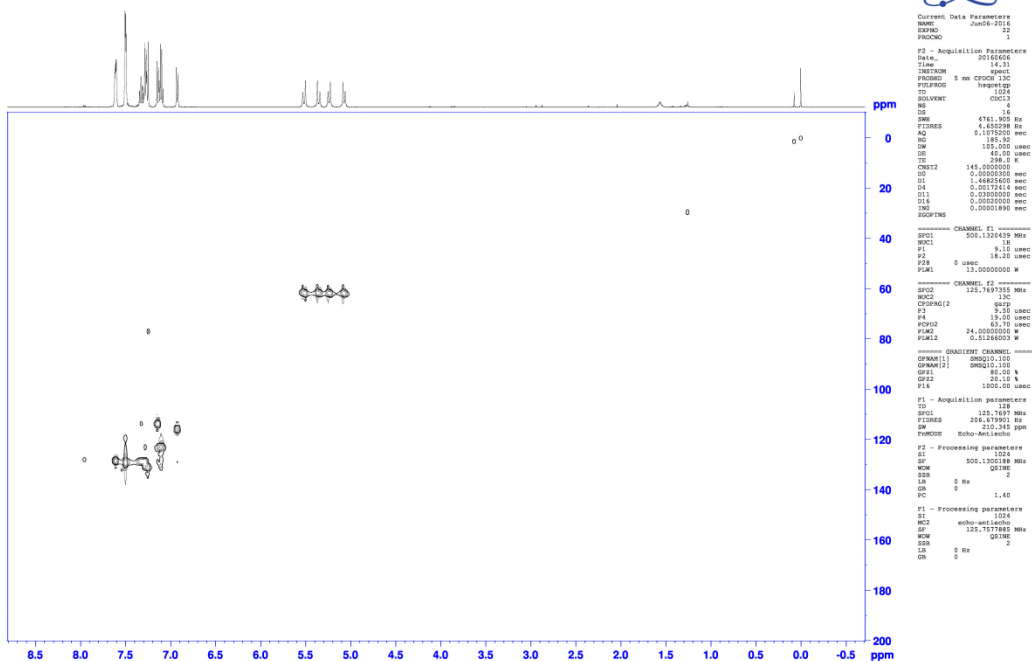

Chemist Alessandro Del Grosso  
MW253  
HMBC.w CDCI3 /opt/topspin3.2 ADG 48

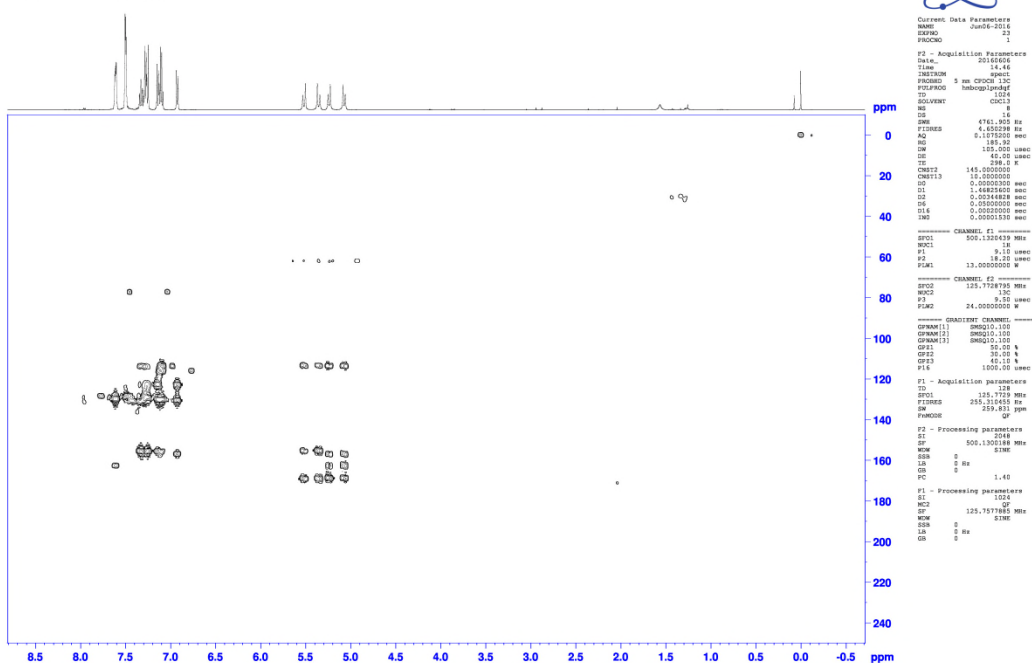

**Compound 5a;** 1-Benzyl-4,15-dihydro-1*H*-dibenzo[7,8:9,10][1,6]dioxecino[3,4-*d*][1,2,3]triazole **5a**.

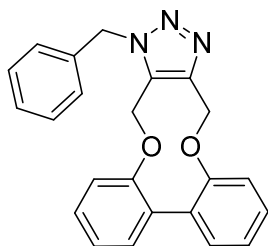

In a round bottom flask, compound **1** (35.4 mg, 0.15 mmol) was dissolved in acetonitrile (0.6 mL). Benzyl azide (19.9 mg, 0.15 mmol) was added and the mixture was heated at 60 °C. After 20 hours the mixture was cooled to room temperature and the volatiles were removed. The product was purified by flash chromatography on silica gel (eluent: Petroleum ether/EtOAc = 3:2 to 2:3) to give compound **5a** (52 mg, 0.14 mmol, 93%) as colourless solid.

m.p. 207.6-208.8 °C.

IR<sub>(neat)</sub> 3059, 3016, 2969, 2945, 1603, 1593, 1571, 1497, 1478, 1453, 1440, 1391, 1368, 1353, 1339, 1303, 1285, 1259, 1244, 1214, 1204 cm<sup>-1</sup>.

$\delta_{\text{H}}$  (500 MHz, CDCl<sub>3</sub>) 7.32 - 7.39 (3H, m, ArH), 7.22 - 7.31 (2H, m, ArH), 7.12 - 7.21 (5H, m, ArH), 7.07 (1H, t,  $J$  = 7.3 Hz, ArH), 6.99 - 7.05 (1H, m, ArH), 6.65 (1H, d,  $J$  = 7.9 Hz, ArH), 5.73 (1H, d,  $J$  = 15.7 Hz, CHH), 5.48 (1H, d,  $J$  = 13.4 Hz, CHH), 5.28 - 5.42 (2H, m, 2xCHH), 5.18 (1H, d,  $J$  = 13.2 Hz, CHH), 5.07 (1H, d,  $J$  = 13.2 Hz, CHH).

$\delta_{\text{C}}$  (125 MHz, CDCl<sub>3</sub>) 156.5 (C), 155.5 (C), 144.8 (C), 134.6 (C), 132.3 (C), 130.7 (CH), 130.6 (C), 130.4 (CH), 129.4 (C), 129.2 (CH), 128.8 (CH), 128.7 (CH), 128.6 (CH), 127.1 (CH), 123.2 (CH), 122.1 (CH), 115.3 (CH), 114.2 (CH), 62.9 (CH<sub>2</sub>), 60.5 (CH<sub>2</sub>), 52.3 (CH<sub>2</sub>).

m/z (ESI) [M + H]<sup>+</sup>, 370.2; [M + Na]<sup>+</sup>, 392.1.

HRMS (ESI-Q-TOF) m/z: [M + Na]<sup>+</sup> Calcd for C<sub>23</sub>H<sub>19</sub>N<sub>3</sub>O<sub>2</sub>Na 392.1369; Found 392.1369.

<sup>1</sup>H NMR (500 MHz, CDCl<sub>3</sub>)

Chemist Alessandro Del Grosso  
ADG 150  
PROTON.w CDCI3 /opt/topspin3.2 ADG 32

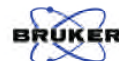

Current Data Parameters  
NAME Jul08-2016  
EXPNO 10  
PROCNO 1

F2 - Acquisition Parameters  
Date\_ 20160708  
Time 16.12  
INSTRUM spect  
PROBHD 5 mm CPDCH 13C  
PULPROG zgpg30  
TD 65536  
SOLVENT CDCl3  
NS 16  
DS 2  
SWH 10000.000 Hz  
FIDRES 0.102088 Hz  
AQ 3.2767999 sec  
RG 47.05  
DM 50.000 usec  
DE 40.00 usec  
TE 298.0 K  
D1 1.0000000 sec  
TD0 1

===== CHANNEL f1 =====  
SFO1 500.1330885 MHz  
NUC1 1H  
P1 9.10 usec  
PLW1 13.0000000 W

F2 - Processing parameters  
SI 65536  
SF 500.1330225 MHz  
WDW EM  
SSB 0 0.30 Hz  
GB 0 1.00  
PC

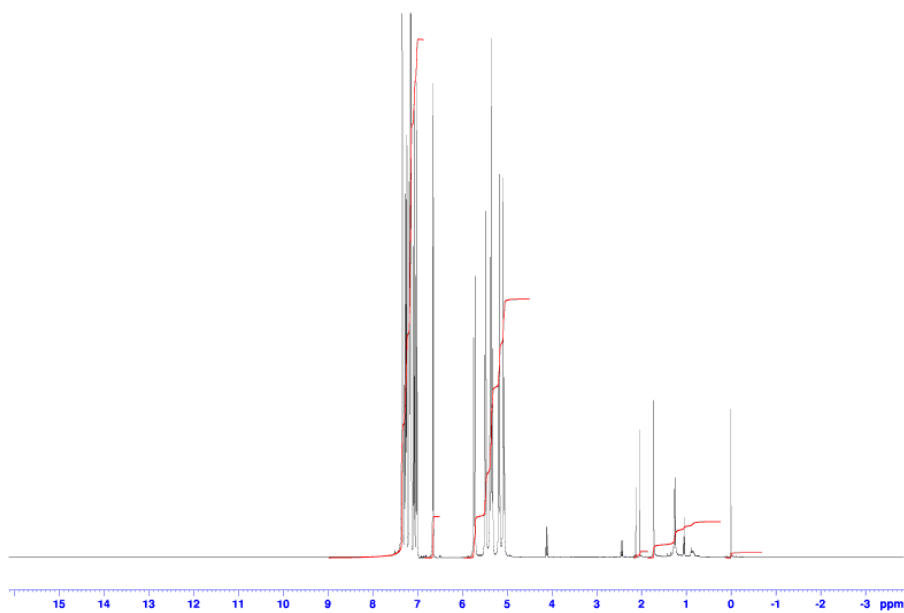

<sup>13</sup>C NMR (125 MHz, CDCl<sub>3</sub>)

C13APT.w CDCI3 /opt/topspin3.2 ADG 32

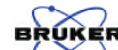

Current Data Parameters  
NAME Jul08-2016  
EXPNO 14  
PROCNO 1

F2 - Acquisition Parameters  
Date\_ 20160708  
Time 17.16  
INSTRUM spect  
PROBHD 5 mm CPDCH 13C  
PULPROG zgpg30  
TD 65536  
SOLVENT CDCl3  
NS 206  
DS 4  
SWH 32894.738 Hz  
FIDRES 0.501934 Hz  
AQ 0.3961472 sec  
RG 185.95  
DM 15.200 usec  
DE 66.43 usec  
TE 298.0 K  
CNS2 145.000000  
D1 1.0000000  
D11 2.0000000 sec  
D2 0.00689652 sec  
TD0 1

===== CHANNEL f1 =====  
SFO1 125.7728795 MHz  
NUC1 13C  
P1 9.50 usec  
P2 19.00 usec  
PLW1 24.0000000 W

===== CHANNEL f2 =====  
SFO2 500.1320005 MHz  
NUC2 1H  
CPDPRG2 waltz16  
PCPD2 65.00 usec  
PLW2 13.0000000 W  
PLW12 0.26784000 W

F2 - Processing parameters  
SI 32768  
SF 125.7577885 MHz  
WDW EM  
SSB 0 1.00 Hz  
GB 0 1.40  
PC

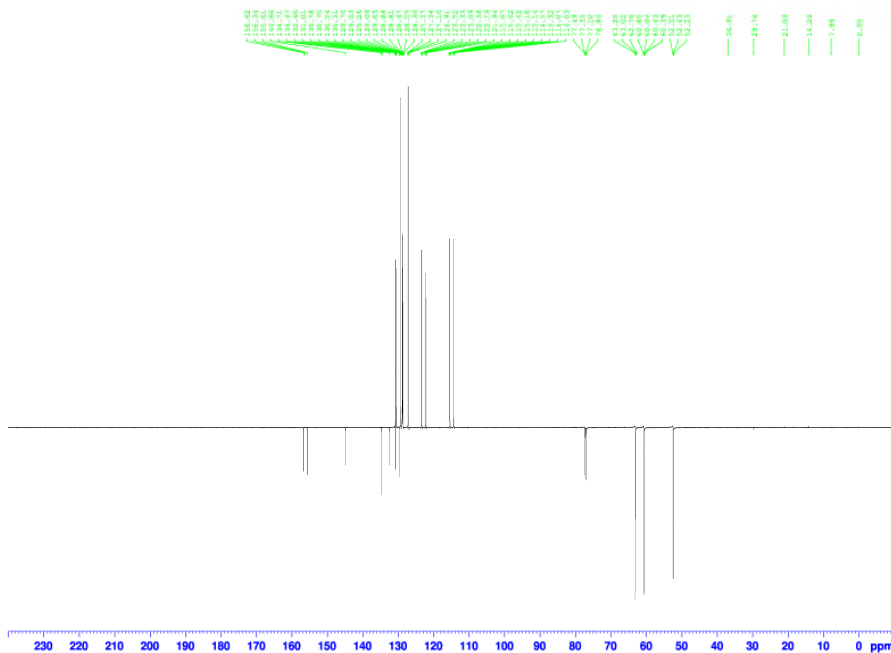

```

Current Data Parameters
NAME          Jul18-2016
UNIT          1
PROBNO       1

F2 - Acquisition Parameters
TIME          20160708
DATE          16.14
INSTRUM       5M
FREQ          5 m (MHz)
P1            13C
P2            3048
P3            3048
RG            CDD13
SOLVENT       H2O
NS            1
DS            0
SFO           558.357 Hz
F1FIMS        2.372848 Hz
P1            0.18580000 sec
P2            0.18580000 sec
P3            0.18580000 sec
D1            0.00000000 sec
D2            0.00000000 sec
D3            0.00000000 sec
D4            0.00000000 sec
D5            0.00000000 sec
D6            0.00000000 sec
D7            0.00000000 sec
D8            0.00000000 sec
D9            0.00000000 sec
D10           0.00000000 sec
D11           0.00000000 sec
D12           0.00000000 sec
D13           0.00000000 sec
D14           0.00000000 sec
D15           0.00000000 sec
D16           0.00000000 sec
D17           0.00000000 sec
D18           0.00000000 sec
D19           0.00000000 sec
D20           0.00000000 sec
D21           0.00000000 sec
D22           0.00000000 sec
D23           0.00000000 sec
D24           0.00000000 sec
D25           0.00000000 sec
D26           0.00000000 sec
D27           0.00000000 sec
D28           0.00000000 sec
D29           0.00000000 sec
D30           0.00000000 sec
D31           0.00000000 sec
D32           0.00000000 sec
D33           0.00000000 sec
D34           0.00000000 sec
D35           0.00000000 sec
D36           0.00000000 sec
D37           0.00000000 sec
D38           0.00000000 sec
D39           0.00000000 sec
D40           0.00000000 sec
D41           0.00000000 sec
D42           0.00000000 sec
D43           0.00000000 sec
D44           0.00000000 sec
D45           0.00000000 sec
D46           0.00000000 sec
D47           0.00000000 sec
D48           0.00000000 sec
D49           0.00000000 sec
D50           0.00000000 sec
D51           0.00000000 sec
D52           0.00000000 sec
D53           0.00000000 sec
D54           0.00000000 sec
D55           0.00000000 sec
D56           0.00000000 sec
D57           0.00000000 sec
D58           0.00000000 sec
D59           0.00000000 sec
D60           0.00000000 sec
D61           0.00000000 sec
D62           0.00000000 sec
D63           0.00000000 sec
D64           0.00000000 sec
D65           0.00000000 sec
D66           0.00000000 sec
D67           0.00000000 sec
D68           0.00000000 sec
D69           0.00000000 sec
D70           0.00000000 sec
D71           0.00000000 sec
D72           0.00000000 sec
D73           0.00000000 sec
D74           0.00000000 sec
D75           0.00000000 sec
D76           0.00000000 sec
D77           0.00000000 sec
D78           0.00000000 sec
D79           0.00000000 sec
D80           0.00000000 sec
D81           0.00000000 sec
D82           0.00000000 sec
D83           0.00000000 sec
D84           0.00000000 sec
D85           0.00000000 sec
D86           0.00000000 sec
D87           0.00000000 sec
D88           0.00000000 sec
D89           0.00000000 sec
D90           0.00000000 sec
D91           0.00000000 sec
D92           0.00000000 sec
D93           0.00000000 sec
D94           0.00000000 sec
D95           0.00000000 sec
D96           0.00000000 sec
D97           0.00000000 sec
D98           0.00000000 sec
D99           0.00000000 sec
D100          0.00000000 sec
D101          0.00000000 sec
D102          0.00000000 sec
D103          0.00000000 sec
D104          0.00000000 sec
D105          0.00000000 sec
D106          0.00000000 sec
D107          0.00000000 sec
D108          0.00000000 sec
D109          0.00000000 sec
D110          0.00000000 sec
D111          0.00000000 sec
D112          0.00000000 sec
D113          0.00000000 sec
D114          0.00000000 sec
D115          0.00000000 sec
D116          0.00000000 sec
D117          0.00000000 sec
D118          0.00000000 sec
D119          0.00000000 sec
D120          0.00000000 sec
D121          0.00000000 sec
D122          0.00000000 sec
D123          0.00000000 sec
D124          0.00000000 sec
D125          0.00000000 sec
D126          0.00000000 sec
D127          0.00000000 sec
D128          0.00000000 sec
D129          0.00000000 sec
D130          0.00000000 sec
D131          0.00000000 sec
D132          0.00000000 sec
D133          0.00000000 sec
D134          0.00000000 sec
D135          0.00000000 sec
D136          0.00000000 sec
D137          0.00000000 sec
D138          0.00000000 sec
D139          0.00000000 sec
D140          0.00000000 sec
D141          0.00000000 sec
D142          0.00000000 sec
D143          0.00000000 sec
D144          0.00000000 sec
D145          0.00000000 sec
D146          0.00000000 sec
D147          0.00000000 sec
D148          0.00000000 sec
D149          0.00000000 sec
D150          0.00000000 sec
D151          0.00000000 sec
D152          0.00000000 sec
D153          0.00000000 sec
D154          0.00000000 sec
D155          0.00000000 sec
D156          0.00000000 sec
D157          0.00000000 sec
D158          0.00000000 sec
D159          0.00000000 sec
D160          0.00000000 sec
D161          0.00000000 sec
D162          0.00000000 sec
D163          0.00000000 sec
D164          0.00000000 sec
D165          0.00000000 sec
D166          0.00000000 sec
D167          0.00000000 sec
D168          0.00000000 sec
D169          0.00000000 sec
D170          0.00000000 sec
D171          0.00000000 sec
D172          0.00000000 sec
D173          0.00000000 sec
D174          0.00000000 sec
D175          0.00000000 sec
D176          0.00000000 sec
D177          0.00000000 sec
D178          0.00000000 sec
D179          0.00000000 sec
D180          0.00000000 sec
D181          0.00000000 sec
D182          0.00000000 sec
D183          0.00000000 sec
D184          0.00000000 sec
D185          0.00000000 sec
D186          0.00000000 sec
D187          0.00000000 sec
D188          0.00000000 sec
D189          0.00000000 sec
D190          0.00000000 sec
D191          0.00000000 sec
D192          0.00000000 sec
D193          0.00000000 sec
D194          0.00000000 sec
D195          0.00000000 sec
D196          0.00000000 sec
D197          0.00000000 sec
D198          0.00000000 sec
D199          0.00000000 sec
D200          0.00000000 sec
D201          0.00000000 sec
D202          0.00000000 sec
D203          0.00000000 sec
D204          0.00000000 sec
D205          0.00000000 sec
D206          0.00000000 sec
D207          0.00000000 sec
D208          0.00000000 sec
D209          0.00000000 sec
D210          0.00000000 sec
D211          0.00000000 sec
D212          0.00000000 sec
D213          0.00000000 sec
D214          0.00000000 sec
D215          0.00000000 sec
D216          0.00000000 sec
D217          0.00000000 sec
D218          0.00000000 sec
D219          0.00000000 sec
D220          0.00000000 sec
D221          0.00000000 sec
D222          0.00000000 sec
D223         
```

[illegible]

HMBC.w CDCI3 /opt/topspin3.2 ADG 32  
0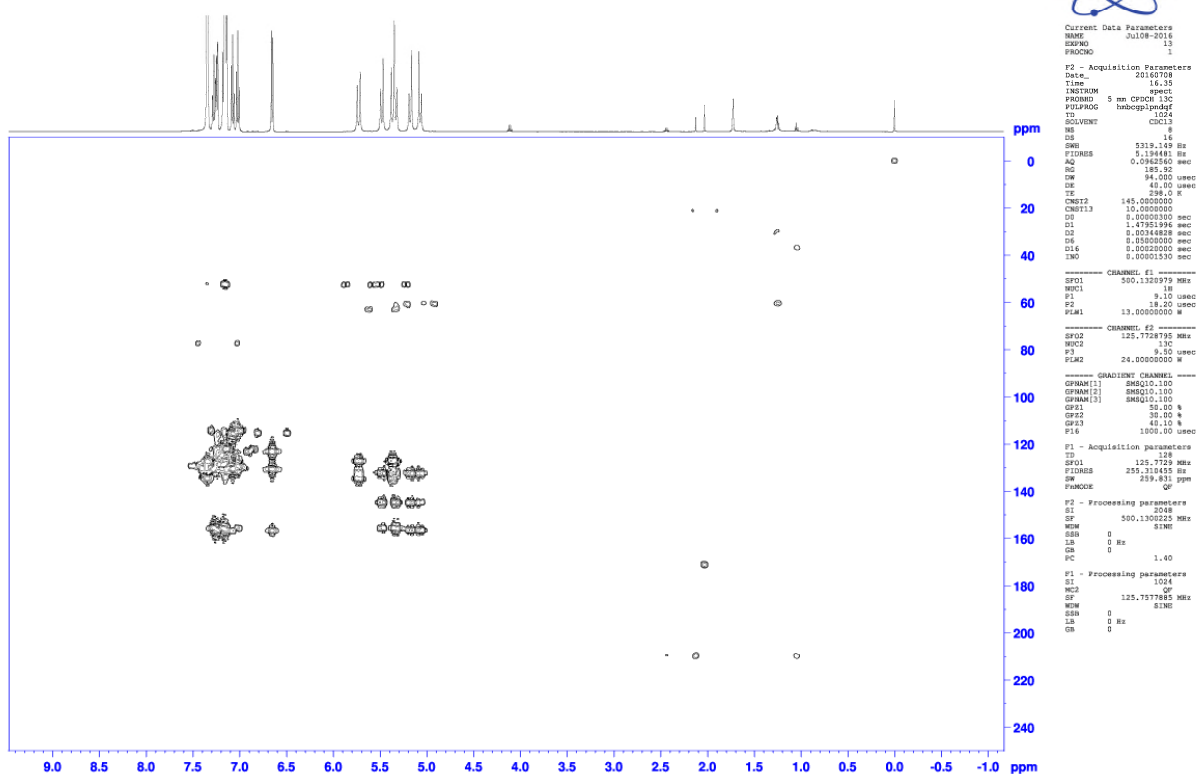

**Compound 6**; 1-Benzyl-4,19-dihydro-1*H*-  
dinaphtho[2',1':7,8;1'',2'':9,10][1,6]dioxecino[3,4-*d*][1,2,3]triazole **6**.

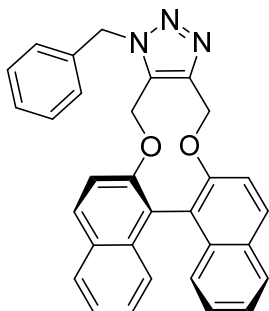

In a round bottom flask, compound **2** (50 mg, 0.15 mmol) was dissolved in DCM (1 mL). Benzyl azide (19.9 mg, 0.15 mmol) was added. After 4 days the volatiles were removed and the product was purified by flash chromatography on silica gel (eluent: Pentane/EtOAc = 4:1 to 1:3) to give compound **6** (64 mg, 0.14 mmol, 92%) as colourless solid.

$[\alpha]_D^{25}$  -152.7 (*c* 0.53, CHCl<sub>3</sub>).

m.p. 114 °C dec.

IR<sub>(neat)</sub> 3055, 3034, 3009, 2944, 2892, 1619, 1590, 1471, 1455, 1431, 1355, 1326, 1267, 1218 cm<sup>-1</sup>.

$\delta_H$  (500 MHz, CDCl<sub>3</sub>) 7.77 - 7.94 (4H, m, ArH), 7.55 (1H, d,  $J$  = 9.0 Hz, ArH), 7.28 – 7.43 (2H, m, ArH), 7.15 - 7.28 (5H, m, ArH), 7.11 (2H, t,  $J$  = 7.7 Hz, ArH), 7.05 (1H, d,  $J$  = 8.5 Hz, ArH), 6.94 (2H, d,  $J$  = 7.5 Hz, ArH), 5.57 – 5.73 (2H, m, CHH), 5.38 (1H, d,  $J$  = 15.7 Hz, CHH), 5.26 (1H, d,  $J$  = 14.0 Hz, CHH), 5.18 (1H, d,  $J$  = 13.1 Hz, CHH), 4.96 (1H, d,  $J$  = 13.1 Hz, CHH).

$\delta_C$  (125 MHz, CDCl<sub>3</sub>) 155.1 (C), 152.8 (C), 144.5 (C), 134.7 (C), 133.6 (C), 132.1 (C), 130.6 (C), 130.0 (CH), 129.6 (C), 129.5 (CH), 128.9 (CH), 128.3 (CH), 128.06 (CH), 128.05 (CH), 126.8 (CH), 126.7 (CH), 126.4 (CH), 126.1 (CH), 125.5 (CH), 124.8 (CH), 124.0 (CH), 123.4 (C), 121.4 (C), 118.8 (CH), 116.6 (CH), 63.3 (CH<sub>2</sub>), 61.9 (CH<sub>2</sub>), 52.1 (CH<sub>2</sub>).

$m/z$  (ESI) 470.2 ([M + H]<sup>+</sup>, 100%).

HRMS (ESI-Q-TOF)  $m/z$ : [M + Na]<sup>+</sup> Calcd for C<sub>31</sub>H<sub>23</sub>N<sub>3</sub>O<sub>2</sub>Na 492.1682; Found 492.1686.

<sup>1</sup>H NMR (500 MHz, CDCl<sub>3</sub>).

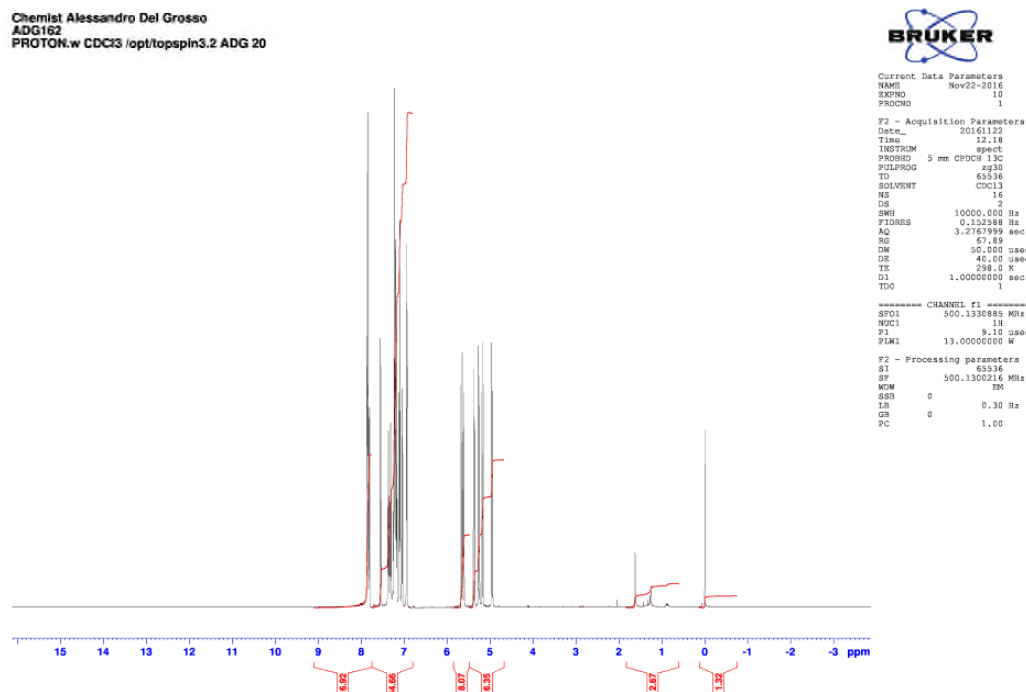

<sup>13</sup>C NMR (125 MHz, CDCl<sub>3</sub>).

C13APT.w CDC13 /opt/topspin3.2 ADG 20

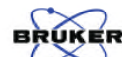

Current Data Parameters  
 NAME Nov22-2016  
 EXPNO 14  
 PROCNO 1

F2 - Acquisition Parameters  
 Date\_ 20161122  
 Time 13.23  
 INSTRUM spect  
 PROBRD 5 mm CPDCH 13C  
 PULPROG jmod  
 TD 65536  
 SOLVENT CDC13  
 NS 256  
 DS 4  
 SWH 32894.738 Hz  
 FIDRES 0.501834 Hz  
 AQ 0.9961472 sec  
 RG 185.92  
 DW 15.200 usec  
 DE 66.43 usec  
 TE 298.0 K  
 CNST2 145.000000  
 CNST11 1.000000  
 D1 2.0000000 sec  
 D20 0.00689655 sec  
 TDO 1

===== CHANNEL f1 =====  
 SFO1 125.7728795 MHz  
 NUC1 13C  
 P1 9.50 usec  
 P2 19.00 usec  
 PLW1 24.0000000 W  
 TDO 1

===== CHANNEL f2 =====  
 SFO2 500.1320000 MHz  
 NUC2 1H  
 CPDPRG2 waltz16  
 PCPD2 65.00 usec  
 PLW2 13.0000000 W  
 PLW12 0.26784000 W

F2 - Processing parameters  
 SI 32768  
 SF 125.7577885 MHz  
 DM  
 WDW 0  
 SSB 0 1.00 Hz  
 GB 0  
 PC 1.40

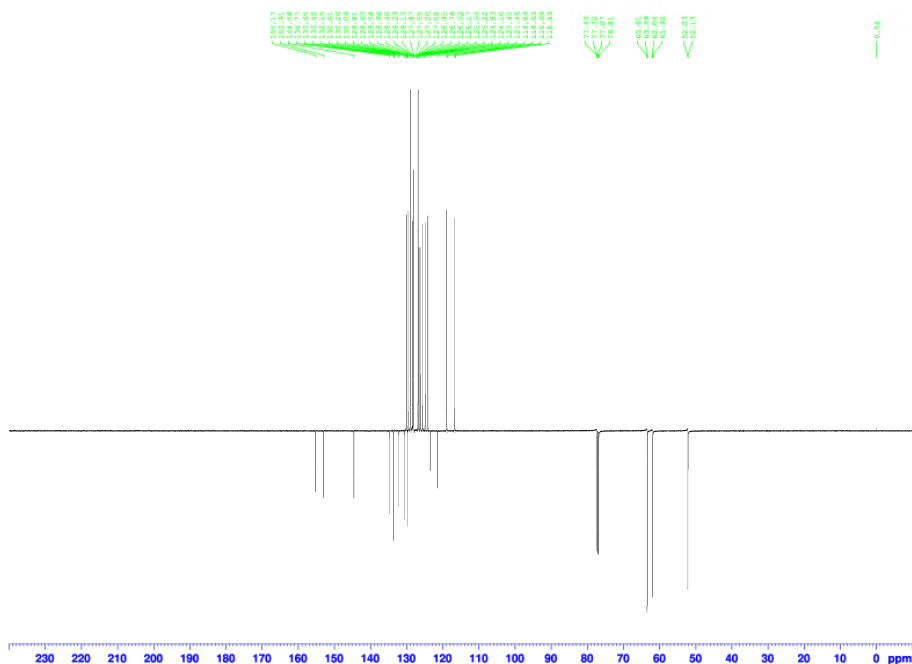

Chemist Alessandro Del Grosso  
 ADG162  
 COSY.w CDC13 /opt/topspin3.2 ADG 20

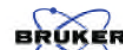

Current Data Parameters  
 NAME Nov22-2016  
 EXPNO 11  
 PROCNO 1

F2 - Acquisition Parameters  
 Date\_ 20161122  
 Time 12.20  
 INSTRUM spect  
 PROBRD 5 mm CPDCH 13C  
 PULPROG jmod  
 TD 65536  
 SOLVENT CDC13  
 NS 256  
 DS 4  
 SWH 3681.818 Hz  
 FIDRES 2.74223 Hz  
 AQ 0.1802246 sec  
 RG 65.5  
 DW 89.000 usec  
 DE 80.00 usec  
 TE 298.0 K  
 CNST2 145.000000  
 CNST11 1.9413096 sec  
 D1 0.0000000 sec  
 D12 0.0000000 sec  
 D13 0.0000000 sec  
 D14 0.0000000 sec  
 D16 0.0000000 sec  
 TDO 0.0001600 sec

===== CHANNEL f1 =====  
 SFO1 500.132110 MHz  
 NUC1 1H  
 P1 9.10 usec  
 P2 9.10 usec  
 PLW1 2500.00 usec  
 PLW12 13.0000000 W  
 PLW10 1.34249897 W

===== GRADIENT CHANNEL =====  
 GPMAX11 8MSQ0.100  
 GPC1 10.00 %  
 P16 1000.00 usec

F1 - Acquisition parameters  
 TD 132  
 SFO1 500.1321 MHz  
 FIDRES 44.389206 Hz  
 SW 11.341 ppm  
 FUNDRES 0

F2 - Processing parameters  
 SI 1624  
 SF 500.1300216 MHz  
 DM  
 WDW 0  
 SSB 0  
 GB 0  
 PC 1.40

F1 - Processing parameters  
 SI 1624  
 SF 500.1300216 MHz  
 DM  
 WDW 0  
 SSB 0  
 GB 0  
 PC 0

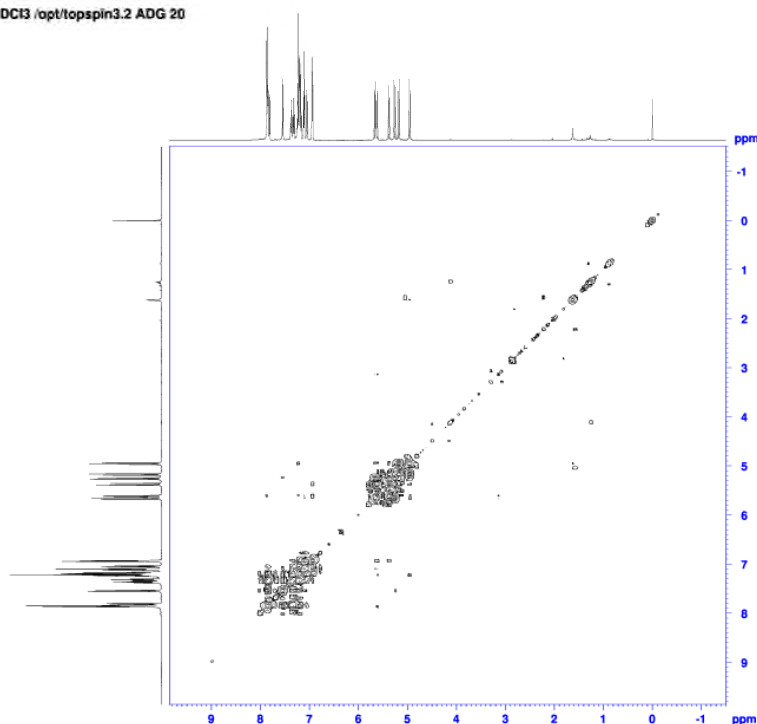



Chemist Alessandro Del Grosso  
ADG152  
HSQC.w CDCl3 /sp/boptspin3.2 ADG 20

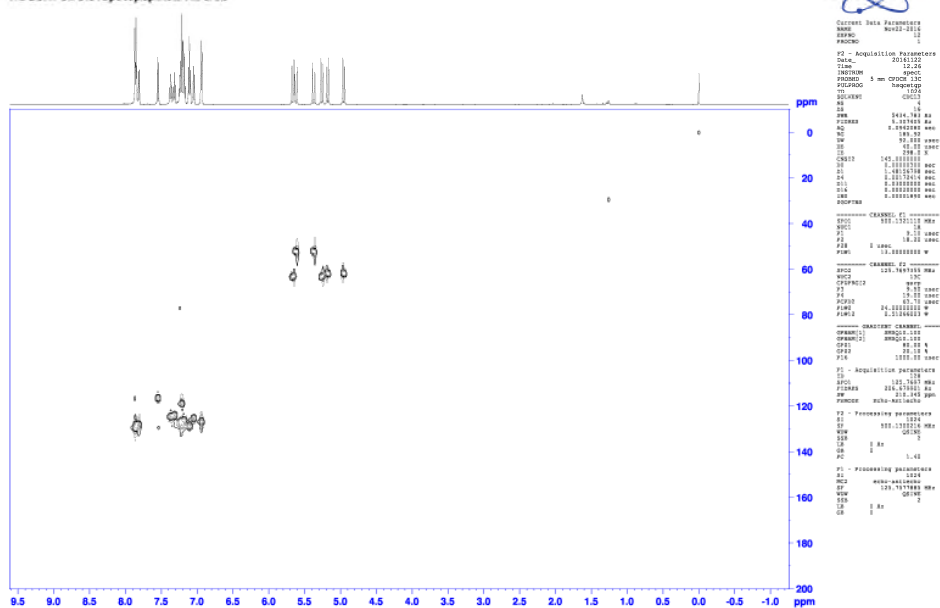

Chemist Alessandro Del Grosso  
ADG162  
HMBC.w CDCl3 /opt/topspin3.2 ADG 20

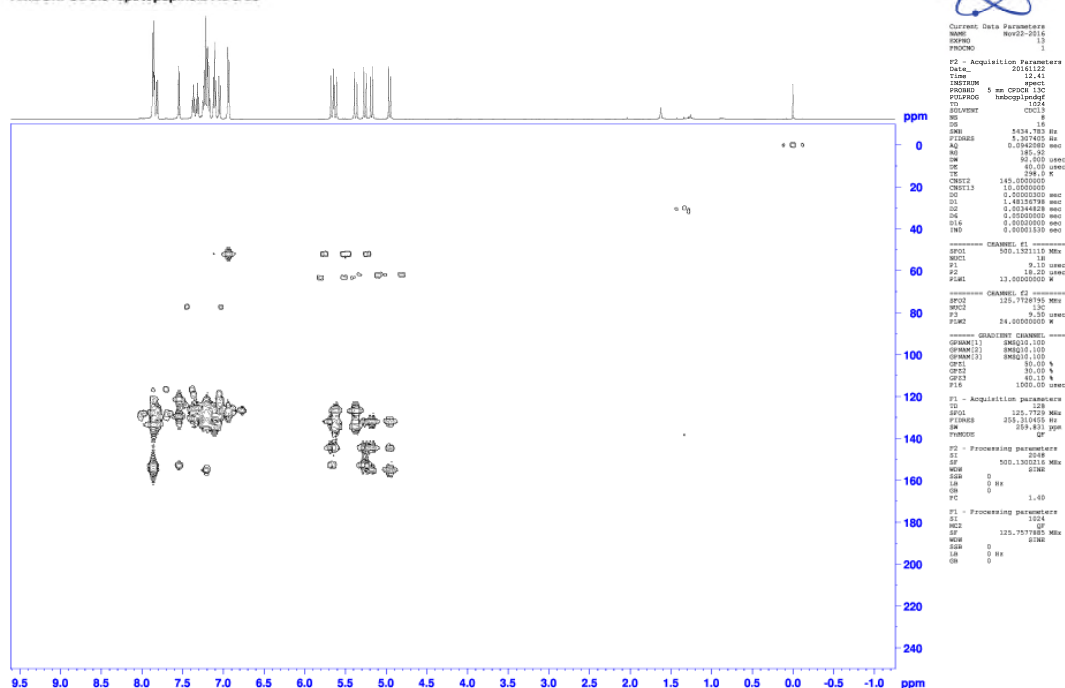

**Compound 5b;** 1-Benzyl-8,11-dibromo-4,15-dihydro-1*H*-dibenzo[7,8:9,10][1,6]dioxecino[3,4-*d*][1,2,3]triazole **5b**.

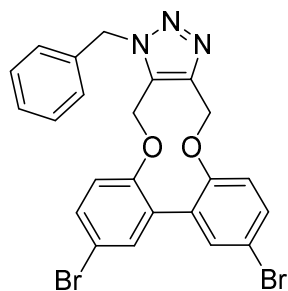

In a round bottom flask, compound **3** (59 mg, 0.15 mmol) was dissolved in acetonitrile (1.5 mL). Benzyl azide (19.9 mg, 0.15 mmol) was added and the mixture was stirred at room temperature for 5 days. The volatiles were removed and the product was purified by flash chromatography on silica gel (eluent: Petroleum ether/EtOAc = 3:2 to 2:3) to give compound **5b** (73 mg, 0.14 mmol, 93%) as a colourless solid.

m.p. 101.2-102.6 °C.

IR<sub>(neat)</sub> 3062, 3032, 1721, 1486, 1455, 1397, 1332, 1270, 1252, 1232, 1207 cm<sup>-1</sup>.

$\delta_H$  (500MHz, CDCl<sub>3</sub>) 7.33 - 7.43 (5H, m, ArH), 7.29 (1H, d,  $J$  = 2.4 Hz, ArH), 7.24 - 7.28 (1H, m, ArH), 7.14 - 7.21 (2H, m, ArH), 7.03 (1H, d,  $J$  = 8.7 Hz, ArH), 6.49 (1H, d,  $J$  = 8.7 Hz, ArH), 5.80 (1H, d,  $J$  = 15.7 Hz, CHH), 5.30 - 5.48 (3H, m, CHH), 5.20 (1H, d,  $J$  = 13.3 Hz, CHH), 5.00 (1H, d,  $J$  = 13.3 Hz, CHH).

$\delta_C$  (125 MHz, CDCl<sub>3</sub>) 155.6 (C), 154.6 (C), 144.4 (C), 134.4 (C), 133.2 (CH), 133.0 (CH), 131.96 (CH), 131.94 (C), 131.92 (CH), 131.4 (C), 130.2 (C), 129.3 (CH), 128.8 (CH), 127.1 (CH), 117.2 (CH), 116.1 (CH), 115.7 (C), 114.4 (C), 63.2 (CH<sub>2</sub>), 60.9 (CH<sub>2</sub>), 52.6 (CH<sub>2</sub>).

m/z (ESI) [M + H]<sup>+</sup>, 525.9; [M + Na]<sup>+</sup>, 547.9.

HRMS (ESI-Q-TOF) m/z: [M + Na]<sup>+</sup> Calcd for C<sub>23</sub>H<sub>17</sub><sup>79</sup>Br<sub>2</sub>N<sub>3</sub>O<sub>2</sub>Na 547.9580; Found 547.9577.

<sup>1</sup>H NMR (500 MHz, CDCl<sub>3</sub>).

Chemist Alessandro Del Grosso  
ADG233  
PROTON.w CDCl<sub>3</sub> /opt/topspin3.2 ADG 22

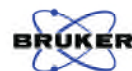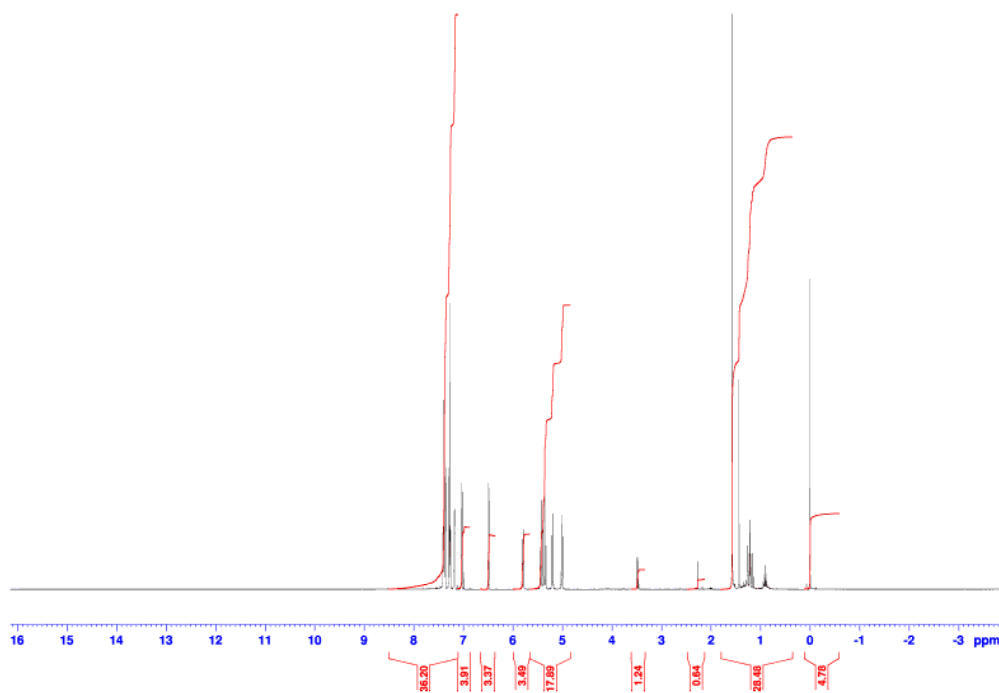

Current Data Parameters  
NAME Sep23-2016  
EXPNO 20  
PROCNO 1

F2 - Acquisition Parameters  
Date\_ 20160923  
Time 17.56  
INSTRUM spect  
PROBHD 5 mm CPDCH 13C  
PULPROG zg30  
TD 65536  
SOLVENT CDCl<sub>3</sub>  
NS 16  
DS 2  
SWH 10000.000 Hz  
FIDRES 0.152588 Hz  
AQ 3.2767999 sec  
RG 185.92  
DW 50.000 usec  
DE 40.00 usec  
TE 298.0 K  
D1 1.00000000 sec  
TD0 1

===== CHANNEL f1 =====  
STO1 500.1330885 MHz  
NUC1 1H  
P1 9.10 usec  
PLW1 13.00000000 W

F2 - Processing parameters  
SI 65536  
SF 500.1300120 MHz  
WDW EM  
SSB 0  
LB 0.30 Hz  
GB 0  
PC 1.00

<sup>13</sup>C NMR (125 MHz, CDCl<sub>3</sub>).

Chemist Alessandro Del Grosso  
ADG233  
C13APT.w CDCl<sub>3</sub> /opt/topspin3.2 ADG 22

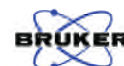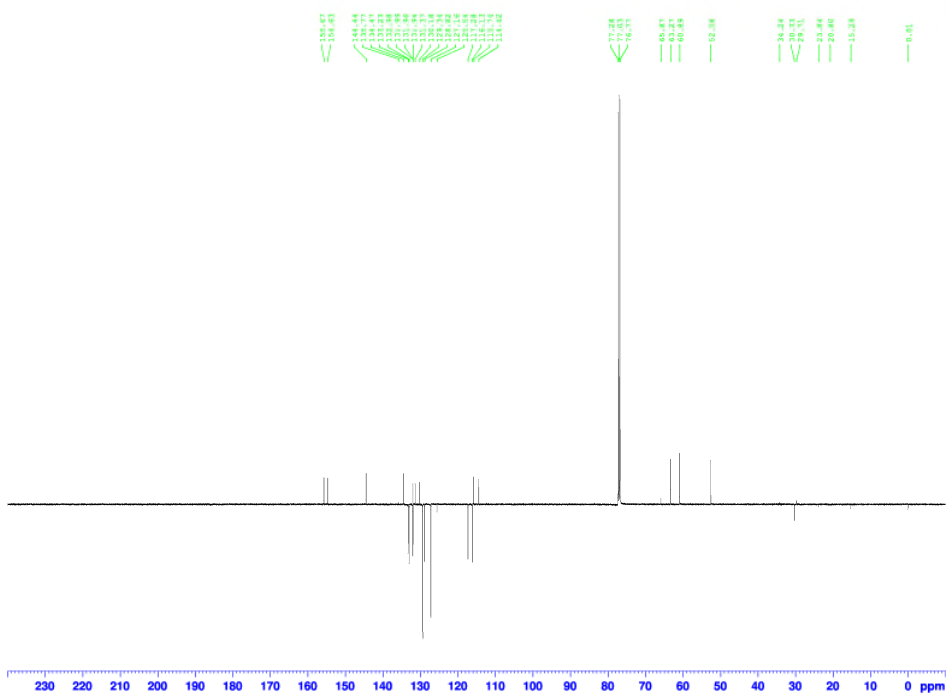

Current Data Parameters  
NAME Sep23-2016  
EXPNO 24  
PROCNO 1

F2 - Acquisition Parameters  
Date\_ 20160923  
Time 19.13  
INSTRUM spect  
PROBHD 5 mm CPDCH 13C  
PULPROG zgpg30  
TD 65536  
SOLVENT CDCl<sub>3</sub>  
NS 536  
DS 4  
SWH 32894.736 Hz  
FIDRES 0.501934 Hz  
AQ 0.9961472 sec  
RG 185.92  
DW 15.200 usec  
DE 66.43 usec  
TE 298.0 K  
CNST2 145.0000000  
CNST11 1.0000000  
D1 5.00000000 sec  
D20 0.00689655 sec  
TD0 1

===== CHANNEL f1 =====  
SFO1 125.7728795 MHz  
NUC1 13C  
P1 9.50 usec  
PLW1 24.00000000 W

===== CHANNEL f2 =====  
SFO2 500.1320005 MHz  
NUC2 1H  
CPDPRG2 waltz16  
PCPD2 65.00 usec  
PLW2 13.00000000 W  
PLW12 0.26784000 W

F2 - Processing parameters  
SI 32768  
SF 125.7577885 MHz  
WDW EM  
SSB 0  
LB 1.00 Hz  
GB 0  
PC 1.40

Chemist Alessandro Del Grosso  
ADG233  
COSY.w CDCl3 /opt/topspin3.2 ADG 22

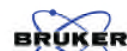

Current Data Parameters  
NAME Sep03-2016  
EXPNO 1  
PROCNO 1

P2 - Acquisition Parameters  
Date\_ 20160923  
Time 17.58  
INSTRUM spect  
PROBHD 5 mm CPDCH 13C  
PULPROG zgpg30  
TD 65536  
SOLVENT CDCl3  
NS 1  
DS 8  
SWH 5252.101 Hz  
FIDRES 2.564503 Hz  
AQ 0.1949696 sec  
RG 254.41  
DM 89.200 usec  
DE 60.00 usec  
TE 298.0 K  
D0 0.0000000 sec  
D1 1.94673190 sec  
D11 0.03000000 sec  
D12 0.00000000 sec  
D13 0.00000000 sec  
D16 0.00000000 sec  
DWS 0.00019040 sec

===== CHANNEL f1 =====  
NUC1 13C  
P0 9.10 usec  
P1 9.10 usec  
P17 2000.00 usec  
PLW1 13.0000000 M  
PLW0 1.59249997 M

===== GRADIENT CHANNEL =====  
GPMAX11 SMO10.100  
GPD1 10.00 %  
P16 3000.00 usec

P1 - Acquisition parameters  
TD 128  
SFO1 500.130120 MHz  
FIDRES 41.032040 Hz  
AQ 12.101  
PC 1.60

P2 - Processing parameters  
SI 1024  
SF 500.1300120 MHz  
WDW GF  
SSB 0 Hz  
LB 0 Hz  
GB 0  
PC 1.60

P1 - Processing parameters  
SI 1024  
SF 500.1300120 MHz  
WDW GF  
SSB 0 Hz  
LB 0 Hz  
GB 0  
PC 1.60

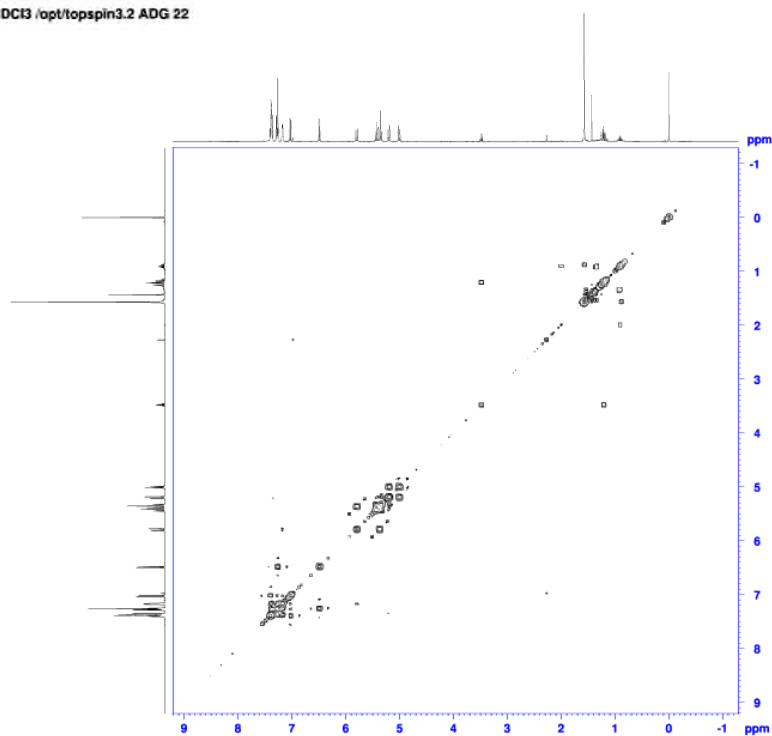

HMBC.w CDCl3 /opt/topspin3.2 ADG 22

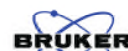

Current Data Parameters  
NAME Sep03-2016  
EXPNO 1  
PROCNO 1

P2 - Acquisition Parameters  
Date\_ 20160923  
Time 18.18  
INSTRUM spect  
PROBHD 5 mm CPDCH 13C  
PULPROG zgpg30  
TD 65536  
SOLVENT CDCl3  
NS 1  
DS 8  
SWH 5000.000 Hz  
FIDRES 4.882812 Hz  
AQ 0.1204000 sec  
RG 181.92  
DM 100.100 usec  
DE 60.00 usec  
TE 298.0 K  
D0 0.0000000 sec  
D1 1.47337604 sec  
D11 0.00000000 sec  
D12 0.00000000 sec  
D16 0.00000000 sec  
DWS 0.00001530 sec

===== CHANNEL f1 =====  
NUC1 13C  
P0 9.10 usec  
P1 9.10 usec  
P17 2000.00 usec  
PLW1 13.0000000 M

===== CHANNEL f2 =====  
SFO2 125.772795 MHz  
SFO3 125.772795 MHz  
P2 9.10 usec  
P3 9.10 usec  
PLW2 24.0000000 M

===== GRADIENT CHANNEL =====  
GPMAX11 SMO10.100  
GPMAX12 SMO10.100  
GPD1 10.00 %  
GPD2 10.00 %  
GPD3 10.00 %  
P16 1000.00 usec

P1 - Acquisition parameters  
TD 128  
SFO1 125.772795 MHz  
FIDRES 205.114401 Hz  
AQ 12.101  
PC 1.60

P2 - Processing parameters  
SI 1024  
SF 500.1300120 MHz  
WDW GF  
SSB 0 Hz  
LB 0 Hz  
GB 0  
PC 1.60

P1 - Processing parameters  
SI 1024  
SF 125.757785 MHz  
WDW GF  
SSB 0 Hz  
LB 0 Hz  
GB 0  
PC 1.60

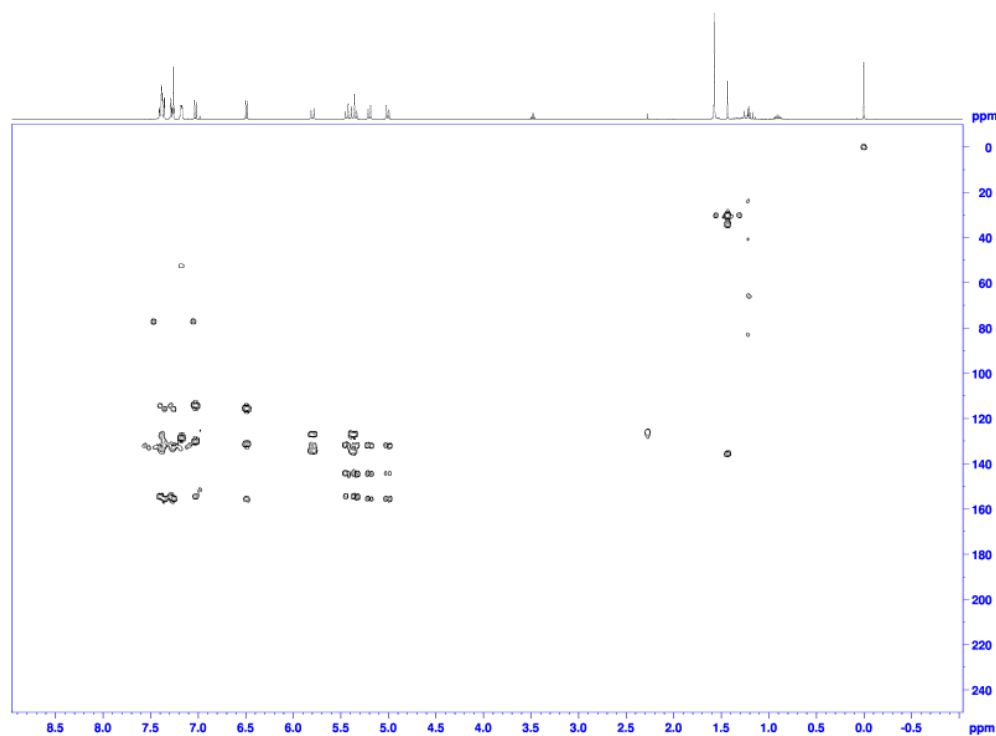

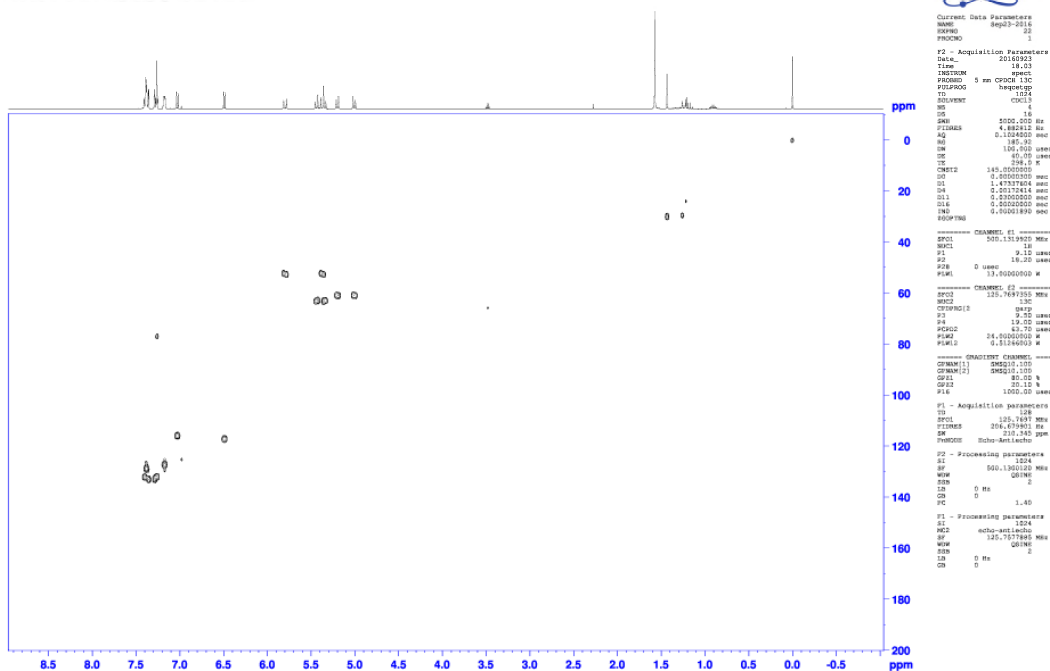

**Compound 5c;** 1-Benzyl-6,8,11,13-tetrabromo-4,15-dihydro-1*H*-dibenzo[7.8:9.10][1,6]dioxecino[3,4-*d'*][1,2,3]triazole **5c**.

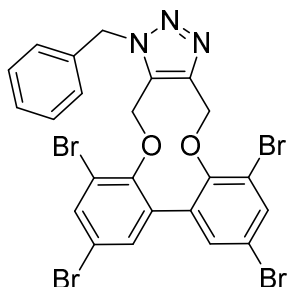

In a J. Young NMR tube compound **4** (50 mg, 0.09 mmol) was dissolved in CDCl<sub>3</sub> (0.9 mL). Benzyl azide (11.9 mg, 0.15 mmol) was added. After 14 days the volatiles were removed and the products was purified by flash chromatography on silica gel (eluent: Hexane/EtOAc = 4:1 to 7:3) to give compound **5c** (57 mg, 0.08 mmol, 92%) as colourless solid.

m.p. 203.1-204.5 °C.

IR<sub>(neat)</sub> 3068, 3060, 3032, 2920, 2850, 1742, 1729, 1550, 1463, 1437, 1399, 1372, 1330, 1282, 1256, 1222 cm<sup>-1</sup>.

$\delta_{\text{H}}$  (500 MHz,  $\text{CDCl}_3$ ) 7.70 (1H, d,  $J = 2.1$  Hz, ArH), 7.65 (1H, d,  $J = 2.1$  Hz, ArH), 7.26 - 7.38 (3H, m, ArH), 7.15 (1H, d,  $J = 2.1$  Hz, ArH), 7.07 (1H, d,  $J = 2.1$  Hz,

ArH), 6.97 (2H, d,  $J = 7.0$  Hz, ArH), 5.69 (1H, d,  $J = 15.7$  Hz, CHH), 5.55 - 5.65 (2H, m, CHH), 5.12 (1H, d,  $J = 13.3$  Hz, CHH), 4.91 (1H, d,  $J = 14.2$  Hz, CHH), 4.78 (1H, d,  $J = 14.2$  Hz, CHH).

$\delta_c$  (125 MHz,  $\text{CDCl}_3$ ) 152.0 (C), 151.7 (C), 143.3 (C), 136.3 (CH), 135.8 (CH), 134.3 (C), 134.2 (C), 133.8 (CH), 133.2 (C), 132.4 (CH), 131.6 (C), 129.1 (CH), 128.6 (CH), 126.9 (CH), 118.5 (C), 117.5 (C), 117.2 (C), 116.6 (C), 65.8 ( $\text{CH}_2$ ), 62.6 ( $\text{CH}_2$ ), 52.6 ( $\text{CH}_2$ ).

$m/z$  (ESI) 707.8 ( $[\text{M} + \text{Na}]^+$ , 100%).

HRMS (ESI-Q-TOF)  $m/z$ :  $[\text{M} + \text{Na}]^+$  Calcd for  $\text{C}_{23}\text{H}_{15}^{79}\text{Br}_4\text{N}_3\text{O}_2\text{Na}$  703.7790; Found 703.7787.

$^1\text{H}$  NMR (500 MHz,  $\text{CDCl}_3$ )

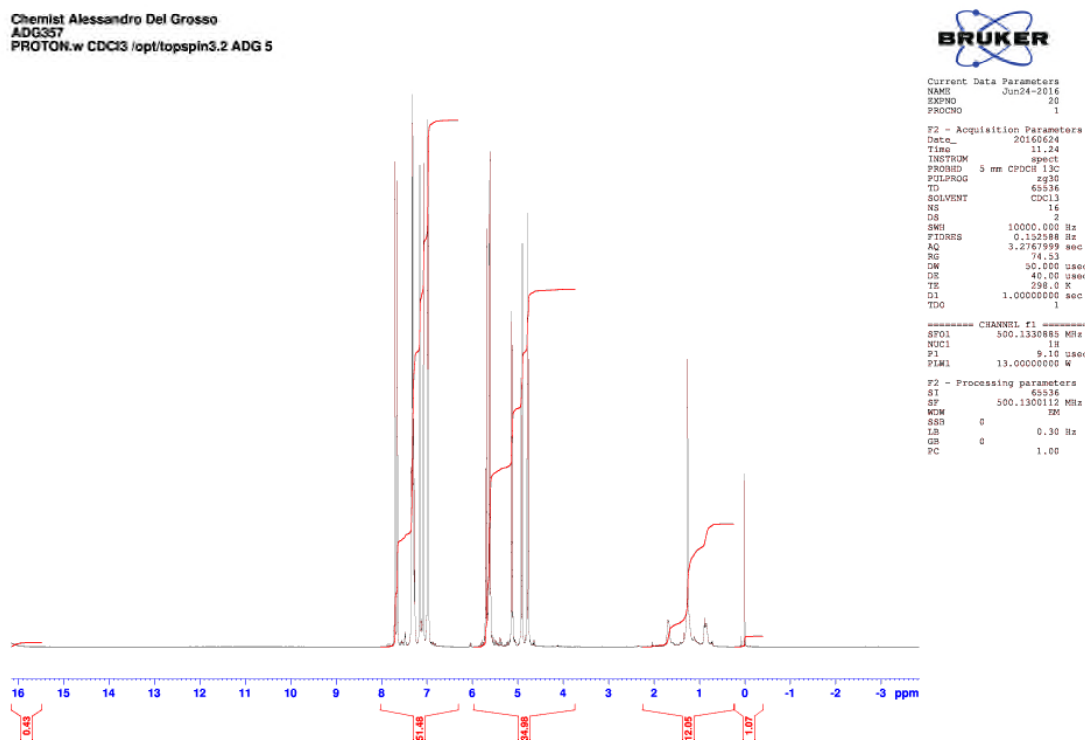

$^{13}\text{C}$  NMR (125 MHz,  $\text{CDCl}_3$ )

Chemist Alessandro Del Grosso  
ADG357  
C13APT.w CDC13 /opt/topspin3.2 ADG 5

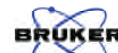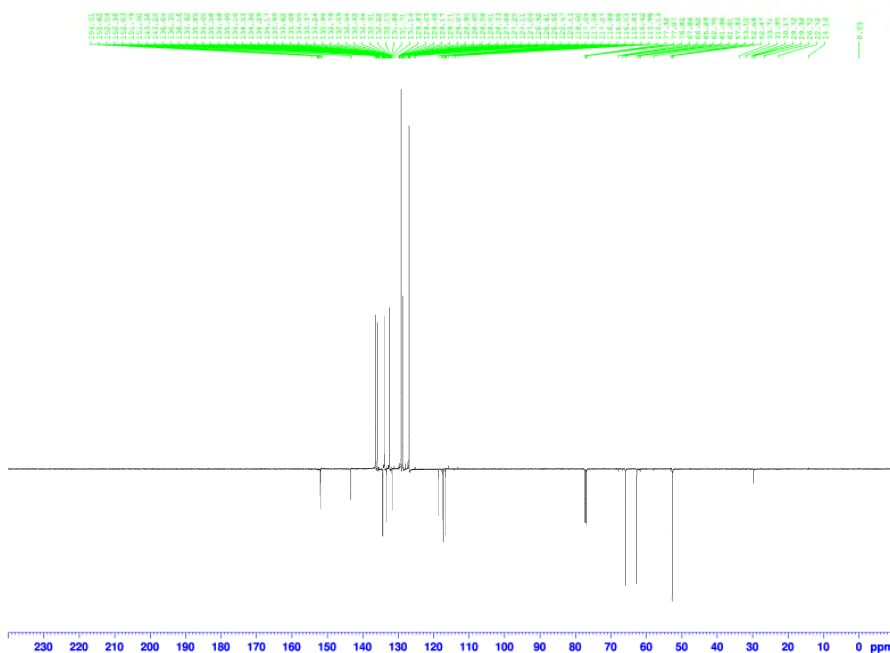

Chemist Alessandro Del Grosso  
ADG357  
COSY.w CDC13 /opt/topspin3.2 ADG 5

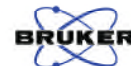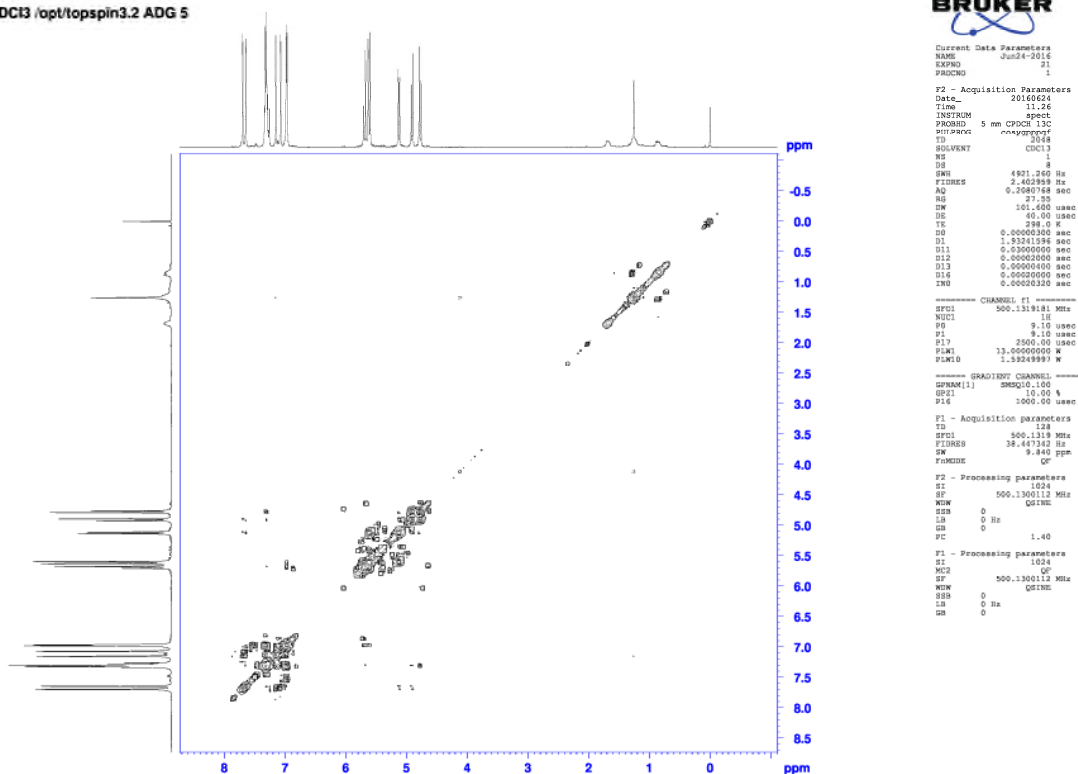

Chemist Alessandro Del Grosso  
ADG357  
HSQC.w CDC13 /opt/topspin3.2 ADG 5

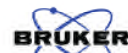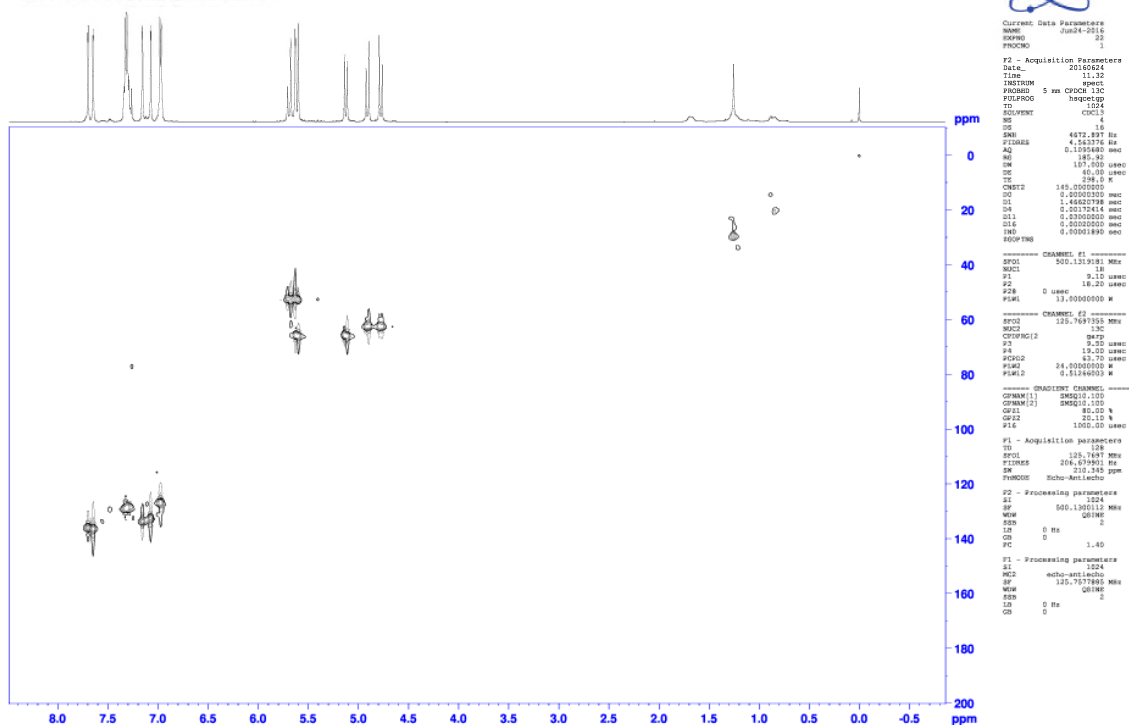

Chemist Alessandro Del Grosso  
ADG357  
HMBC.w CDC13 /opt/topspin3.2 ADG 5

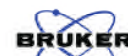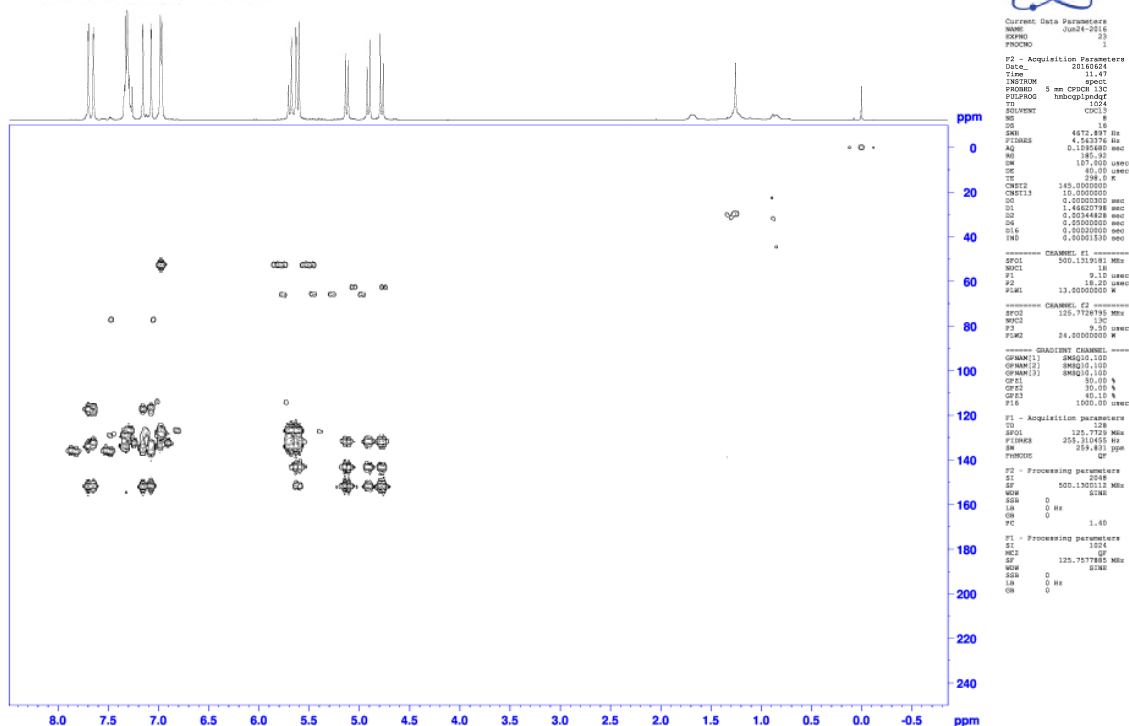



**Compound 15;** Methyl 1-benzyl-4,15-dihydro-1*H*-dibenzo[7,8:9,10][1,6]dioxecino[3,4-*d*][1,2,3]triazole-8-carboxylate and methyl 1-benzyl-4,15-dihydro-1*H*-dibenzo[7,8:9,10][1,6]dioxecino[3,4-*d*][1,2,3]triazole-11-carboxylate **15**.

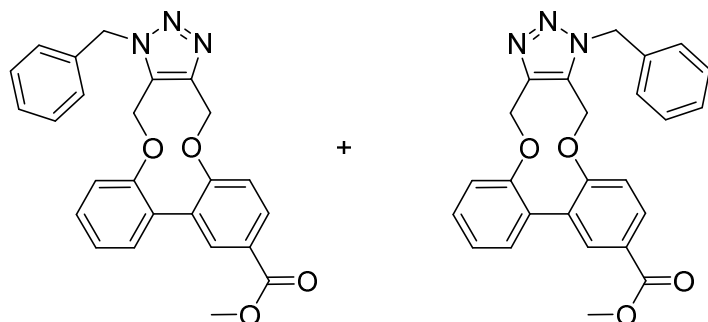

In a round bottom flask compound **11** (44.1 mg, 0.15 mmol) was dissolved in *d*<sub>3</sub>-acetonitrile (0.6 mL). Benzyl azide (19.9 mg, 0.15 mmol) was added. After 4 days the volatiles were removed and the products was purified by flash chromatography on silica gel (eluent: Hexane/EtOAc = 1:1) to give a ~ 1:1 ratio of isomers of compound **15** (59 mg, 0.14 mmol, 92%) as colourless solid.

m.p. 138.5 °C dec.

IR<sub>(neat)</sub> 3062, 3031, 2950, 1709, 1597, 1575, 1496, 1434, 1412, 1372, 1311, 1239, 1210, 1140 cm<sup>-1</sup>.

δ<sub>H</sub> (500 MHz, CDCl<sub>3</sub>) 7.97 (1H, dd, *J* = 8.5, 2.1 Hz, Ar*H*), 7.89 (1H, d, *J* = 2.1 Hz, Ar*H*), 7.93 (1H, d, *J* = 2.1 Hz, Ar*H*), 7.77 (1H, dd, *J* = 8.5, 2.0 Hz, Ar*H*), 7.25 - 7.42 (8H, m, Ar*H*), 7.09 - 7.24 (9H, m, Ar*H*), 7.06 (1H, t, *J* = 7.5 Hz, Ar*H*), 6.73 (1H, d, *J* = 8.1 Hz, Ar*H*), 6.47 (1H, dd, *J* = 8.5, 1.7 Hz, Ar*H*), 5.68 - 5.83 (2H, m, CH<sub>2</sub>), 5.56 (1H, d, *J* = 13.7 Hz, CH<sub>2</sub>), 5.30 - 5.44 (5H, m, CH<sub>2</sub>), 5.12 - 5.26 (3H, m, CH<sub>2</sub>), 5.03 (1H, d, *J* = 13.1 Hz, CH<sub>2</sub>), 3.85 (3H, s, CH<sub>3</sub>), 3.86 (3H, s, CH<sub>3</sub>).

δ<sub>C</sub> (CDCl<sub>3</sub>, 125 MHz) 166.6 (C), 166.4 (C), 159.8 (C), 159.2 (C), 156.8 (C), 156.0 (C), 144.7 (C), 144.4 (C), 134.6 (C), 134.4 (C), 132.4 (CH), 132.3 (C), 132.2 (CH), 132.0 (C), 130.8 (CH), 130.7 (CH), 130.6 (CH), 130.5 (C), 130.3 (CH), 129.8 (C), 129.5 (C), 129.4 (CH), 129.3 (CH), 129.2 (CH), 128.8 (CH), 128.7 (CH), 128.6 (C), 127.2 (CH), 127.1 (CH), 124.9 (C), 123.9 (C), 123.5 (CH), 122.4 (CH), 115.9 (CH), 114.8 (CH), 114.1 (CH), 113.5 (CH), 63.7 (CH<sub>2</sub>), 62.9 (CH<sub>2</sub>), 60.9 (CH<sub>2</sub>), 60.2 (CH<sub>2</sub>), 52.6 (CH<sub>2</sub>), 52.4 (CH<sub>2</sub>), 52.0 (CH<sub>3</sub>), 51.9 (CH<sub>3</sub>).

m/z (ESI) [M + H]<sup>+</sup>, 428.1; [M + Na]<sup>+</sup>, 450.1.

HRMS (ESI-Q-TOF)  $m/z$ :  $[M + Na]^+$  Calcd for  $C_{25}H_{21}N_3O_4Na$  450.1424; Found 450.1427.

$^1H$  NMR (500 MHz,  $CDCl_3$ )

Chemist Alessandro Del Grosso  
ADG337  
PROTON.w  $CDCl_3$  /opt/topspin3.2 ADG 22

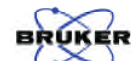

Current Data Parameters  
NAME Nov22-2016  
EXPNO 20  
PROCNO 1

F2 - Acquisition Parameters  
Date\_ 20161122  
Time 14.39  
INSTRUM spect  
PROBHD 5 mm CPDCH 13C  
PULPROG zg30  
TD 65536  
SOLVENT  $CDCl_3$   
NS 16  
DS 2  
SWH 10000.000 Hz  
FIDRES 0.152988 Hz  
AQ 3.2767999 sec  
RG 92.7  
DM 50.000 usec  
DE 45.00 usec  
TE 298.0 K  
D1 1.0000000 sec  
TD0 1

===== CHANNEL f1 =====  
SFO1 500.1330885 MHz  
NUC1 1H  
P1 9.10 usec  
P1M1 13.0000000 W

F2 - Processing parameters  
SI 65536  
SF 500.1300136 MHz  
WDW EM  
SSB 0  
LB 0.30 Hz  
GB 0  
PC 1.00

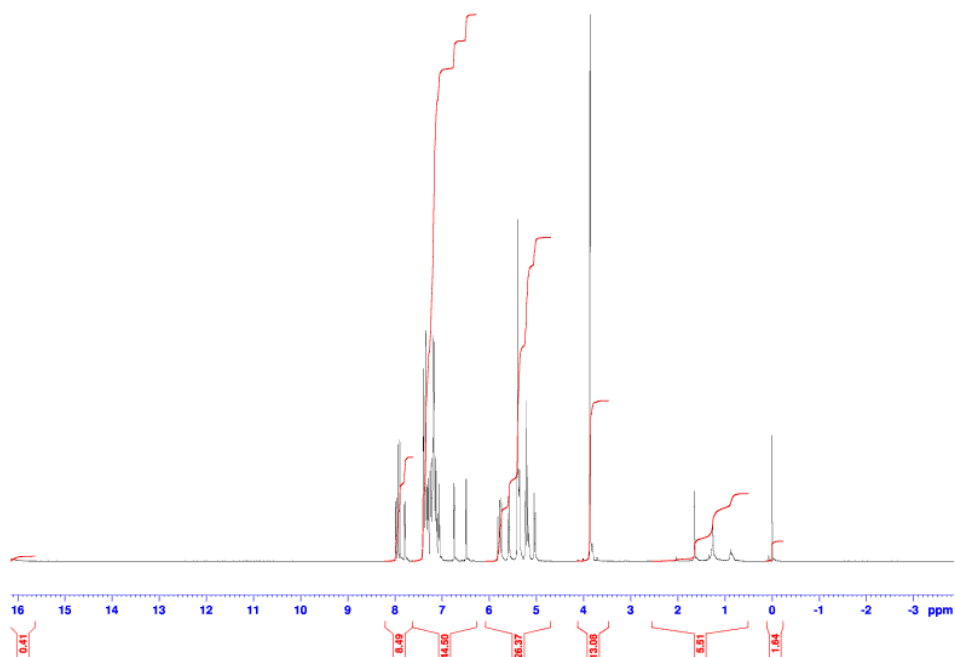

$^{13}C$  NMR (125 MHz,  $CDCl_3$ )..

Chemist Alessandro Del Grosso  
ADG337  
C13APT.w CDCI3 /opt/topspin3.2 ADG 22

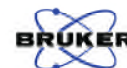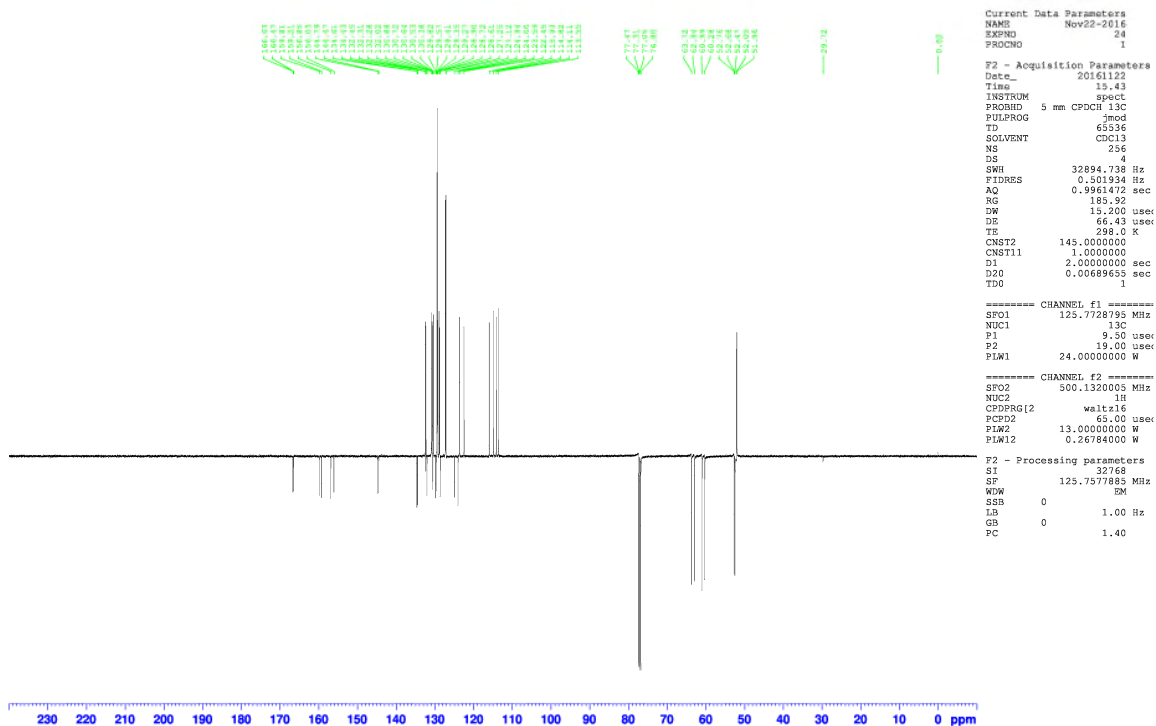

Chemist Alessandro Del Grosso  
ADG337  
COSY.w CDCl3 /opt/topspin3.2 ADG 22

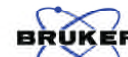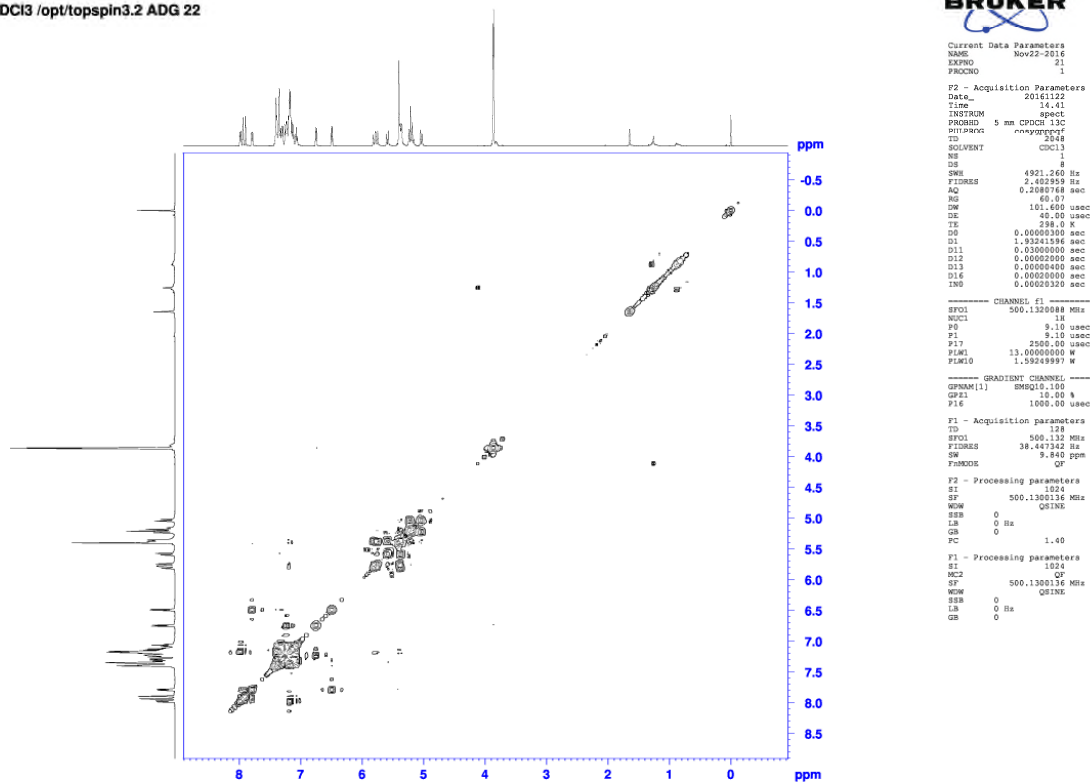

Chemist Alessandro Del Grosso  
ADG337  
HSQC.w CDCI3 /opt/topspin3.2 ADG 22

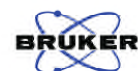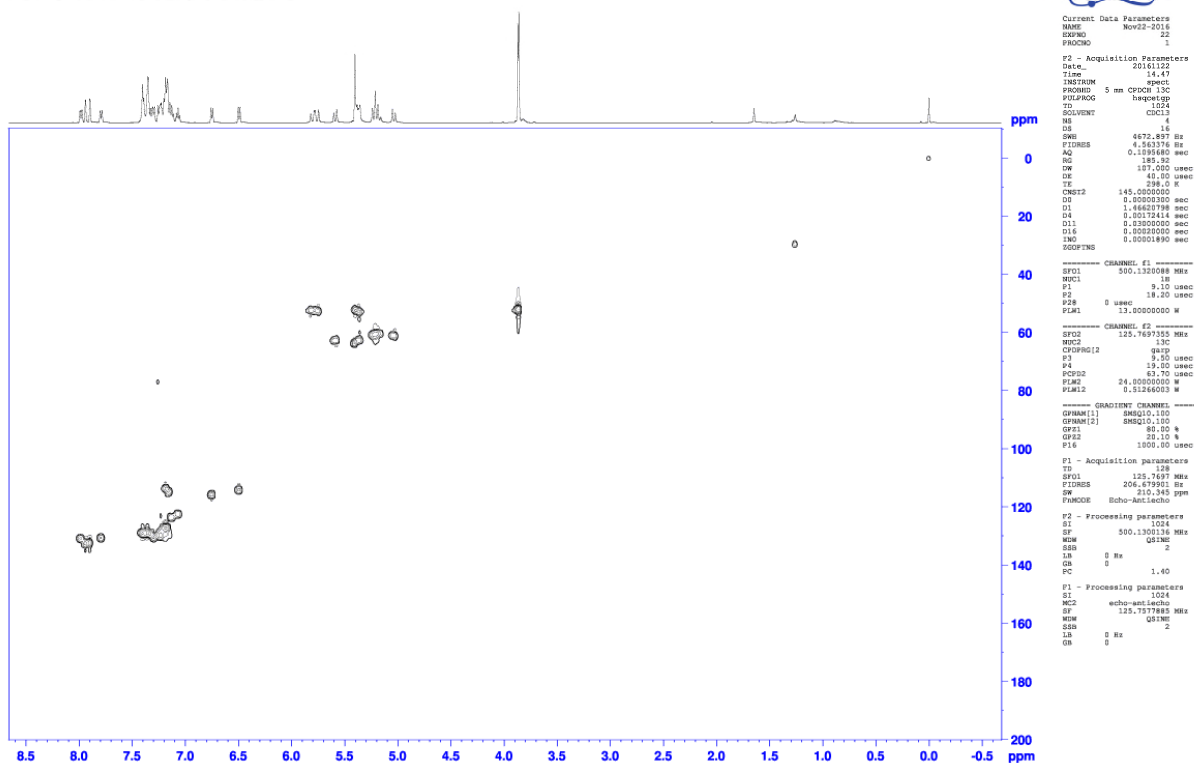

Chemist Alessandro Del Grosso  
ADG337  
HMBC.w CDCI3 /opt/topspin3.2 ADG 22

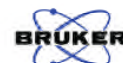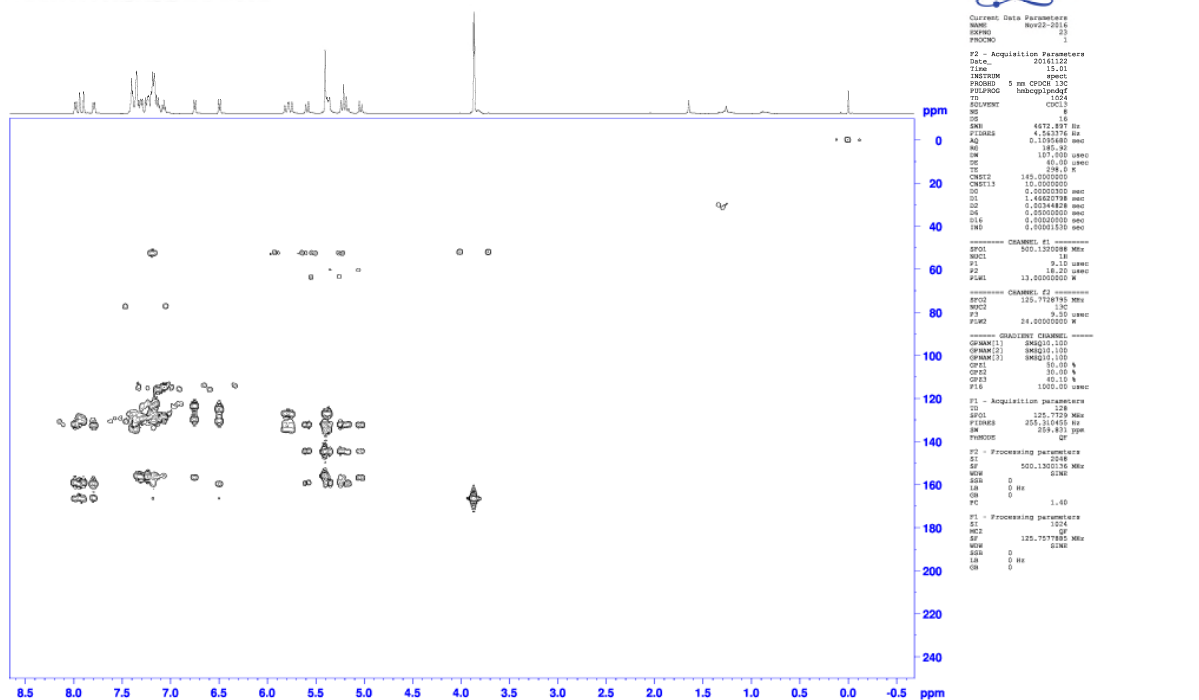

1-Benzyl-6,8,11,13-tetrabromo-4,15-dihydro-1*H*-  
dibenzo[7,8:9,10][1,6]dioxecino[3,4-*d*][1,2,3]triazole **7**.

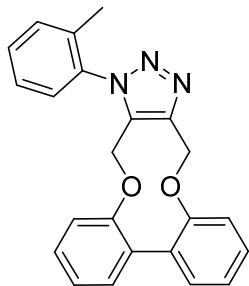

In a round bottom flask 8,13-dioxatricyclo[12.4.0.0<sup>2,7</sup>]octadeca-1(14),2,4,6,15,17-hexaen-10-yne (**1**) (30 mg, 0.127 mmol) was dissolved in DCM (0.3 mL). *o*-Tolyl azide (~0.5 M in *tert*-butyl methyl ether, 0.5 mL, 0.25 mmol) was added. After 10 days the volatiles were removed and the products was purified by flash chromatography on silica gel (eluent: Hexane/EtOAc = 4:1 to 3:2) to give 1-(*o*-tolyl)-4,15-dihydro-1*H*-dibenzo[7,8:9,10][1,6]dioxecino[3,4-*d*][1,2,3]triazole **7** (45 mg, 0.122 mmol, 96%) as a colourless solid.

m.p. 76.2 °C dec.

IR<sub>(neat)</sub> 3059, 3026, 2928, 2891, 1594, 1573, 1499, 1479, 1440, 1382, 1372, 1336, 1260, 1242, 1212 cm<sup>-1</sup>.

$\delta_H$  (500 MHz, CDCl<sub>3</sub>) 7.45 - 7.51 (1H, m, *ArH*), 7.23 - 7.44 (6H, m, *ArH*), 7.18 - 7.23 (2H, m, *ArH*), 7.12 (1H, td, *J* = 7.4, 0.9 Hz, *ArH*), 7.04 (1H, td, *J* = 7.4, 0.8 Hz, *ArH*), 6.81 (1H, d, *J* = 7.8 Hz, *ArH*), 5.61 (1H, d, *J* = 13.4 Hz, *CHH*), 5.45 (1H, d, *J* = 13.4 Hz, *CHH*), 5.07 (2H, d, *J* = 6.7 Hz, *CH*<sub>2</sub>), 1.97 (3H, br. s., *CH*<sub>3</sub>).

$\delta_C$  (125 MHz, CDCl<sub>3</sub>) 156.7 (C), 155.6 (C), 143.8 (C), 135.8 (C), 134.4 (C), 133.6 (C), 131.5 (CH), 130.9 (C), 130.8 (CH), 130.7 (CH), 130.6 (CH), 129.6 (C), 128.8 (CH), 128.7 (CH), 127.2 (CH), 126.8 (CH), 123.3 (CH), 122.1 (CH), 115.5 (CH), 114.2 (CH), 62.9 (CH<sub>2</sub>), 61.0 (CH<sub>2</sub>), 17.1 (CH<sub>3</sub>).

m/z (ESI) [M + Na]<sup>+</sup>, 392.1.

HRMS (ESI-Q-TOF) m/z: [M + Na]<sup>+</sup> Calcd for C<sub>23</sub>H<sub>19</sub>N<sub>3</sub>O<sub>2</sub>Na 392.1369; Found 392.1368.

<sup>1</sup>H NMR (500 MHz, CDCl<sub>3</sub>)

Chemist Alessandro Del Grosso  
ADG394  
PROTON.w CDC13 /opt/topspin3.2 ADG 41

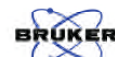

Current Data Parameters  
NAME Jul22-2016  
EXPNO 10  
PROCNO 1

F2 - Acquisition Parameters  
Date\_ 20160722  
Time 19.11  
INSTRUM spect  
PROBHD 5 mm CPDCH 13C  
PULPROG zg30  
TD 65536  
SOLVENT CDC13  
NS 16  
DS 2  
SWH 10000.000 Hz  
FIDRES 0.132588 Hz  
AQ 3.2767999 sec  
RG 134.41  
DM 50.000 usec  
DE 40.00 usec  
TE 298.0 K  
D1 1.0000000 sec  
TD0 1

===== CHANNEL f1 =====  
NUC1 13  
P1 9.10 usec  
PLW1 13.0000000 W

F2 - Processing parameters  
SI 4  
SF 500.1300885 MHz  
WDW EM  
SSB 0  
LB 0.30 Hz  
GB 0  
PC 1.00

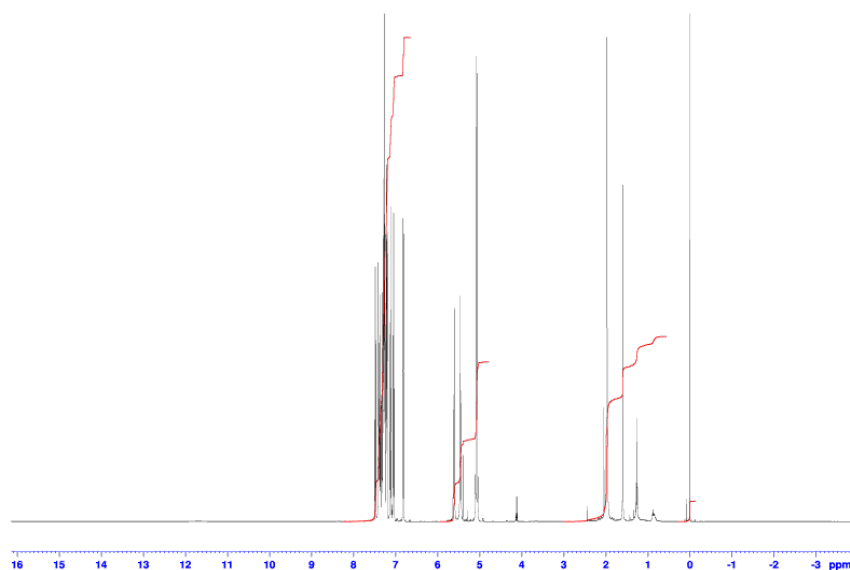

$^{13}\text{C}$  NMR (126 MHz,  $\text{CDCl}_3$ )

Chemist Alessandro Del Grosso  
ADG394  
C13APT.w CDC13 /opt/topspin3.2 ADG 41

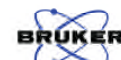

Current Data Parameters  
NAME Jul22-2016  
EXPNO 15  
PROCNO 1

F2 - Acquisition Parameters  
Date\_ 20160722  
Time 20.13  
INSTRUM spect  
PROBHD 5 mm CPDCH 13C  
PULPROG jmod  
TD 65536  
SOLVENT CDC13  
NS 256  
DS 4  
SWH 32894.738 Hz  
FIDRES 0.501934 Hz  
AQ 0.9901472 sec  
RG 185.92  
DM 15.200 usec  
DE 66.43 usec  
TE 298.0 K  
CNST2 145.0000000  
CNST11 1.0000000  
D1 2.0000000 sec  
D20 0.00689655 sec  
TD0 1

===== CHANNEL f1 =====  
SPC1 125.772785 MHz  
NUC1 13C  
P1 9.50 usec  
P2 19.00 usec  
PLW1 24.0000000 W

===== CHANNEL f2 =====  
SPC2 500.1320005 MHz  
NUC2 1H  
CPDPRG2 waltz16  
PCPD2 65.00 usec  
PLW2 13.0000000 W  
PLW12 0.26784000 W

F2 - Processing parameters  
SI 32768  
SF 125.7577885 MHz  
WDW EM  
SSB 0  
LB 1.00 Hz  
GB 0  
PC 1.40

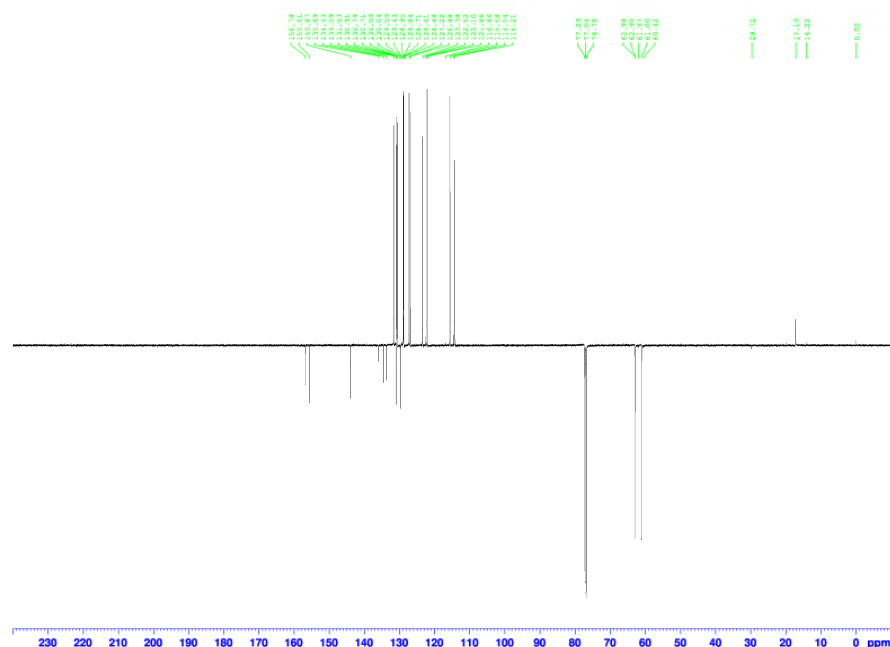

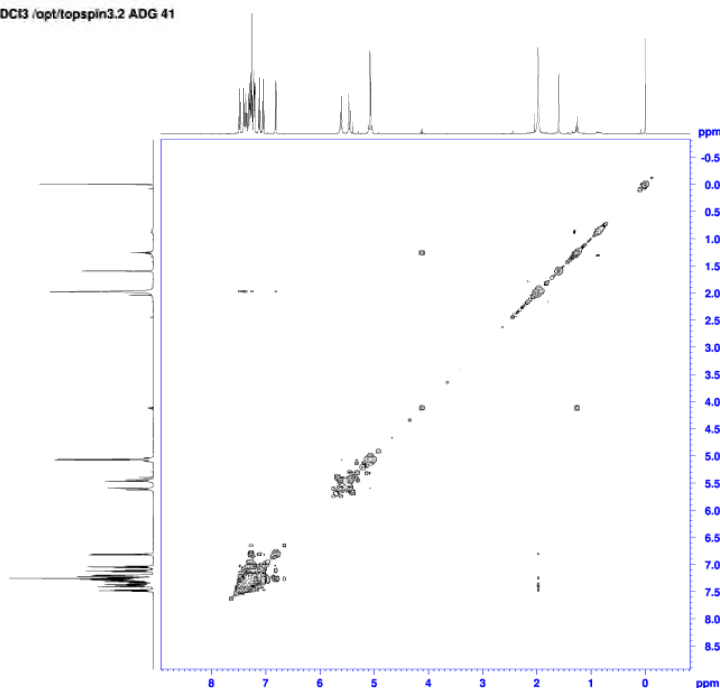[illegible]

Chemist Alessandro Del Grosso  
ADG394  
HSQC.w CDC13 (op)topspin3.2 ADG 41

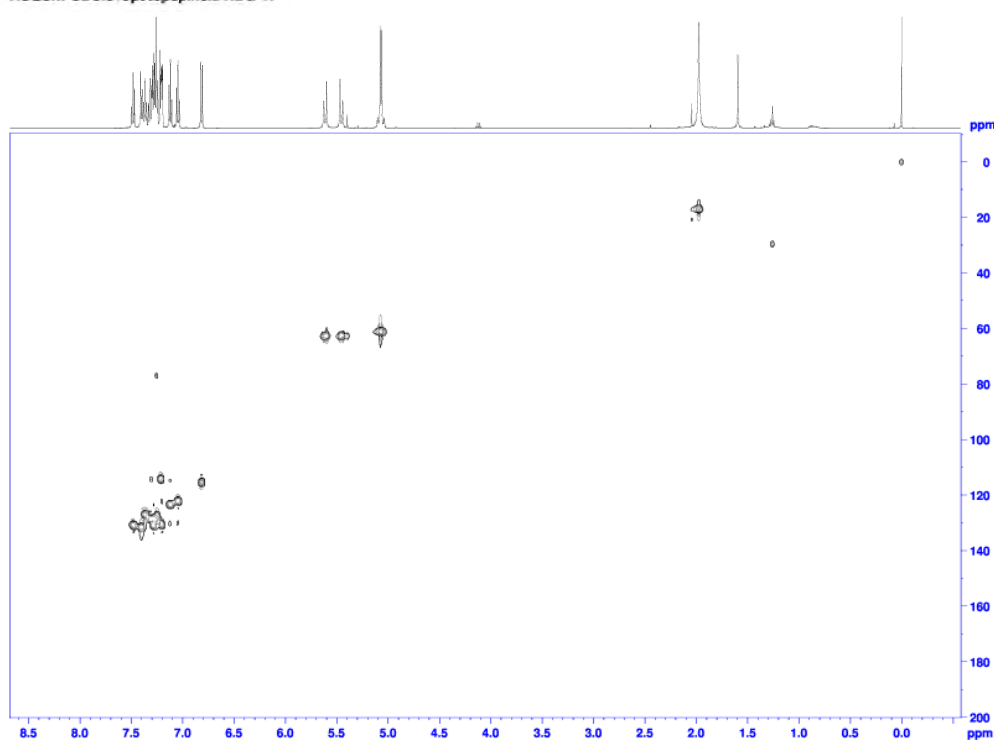[illegible]

Chemist Alessandro Del Grosso  
ADG394  
HMBC.w CDCl3 /opt/topspin3.2 ADG 41

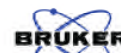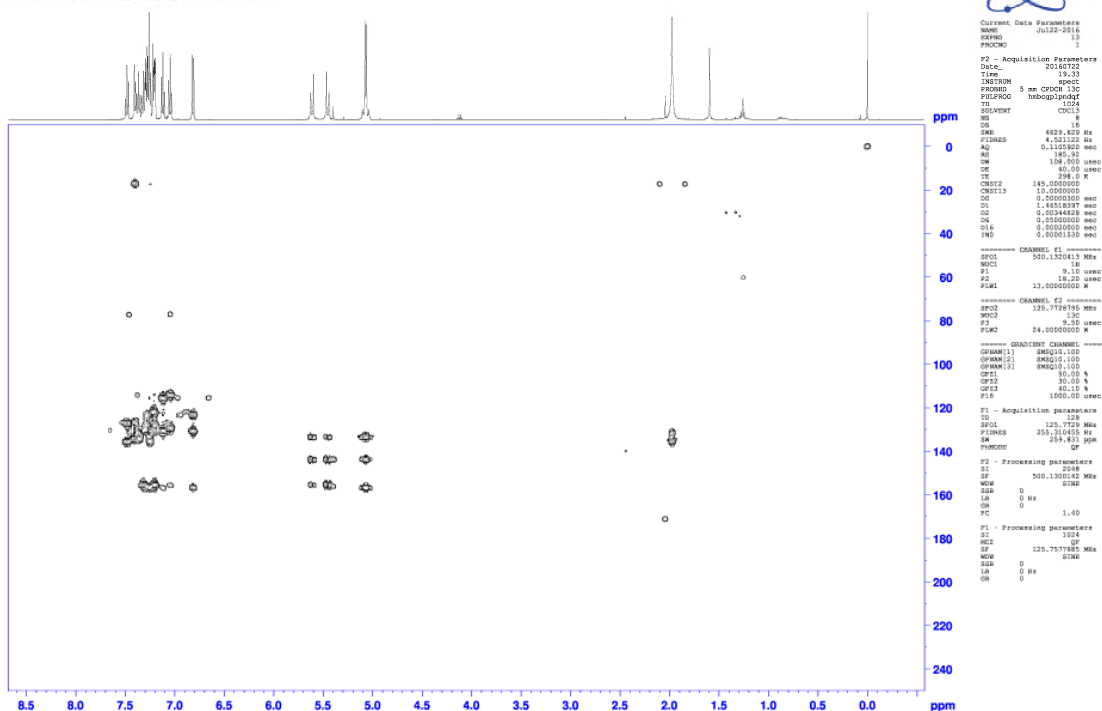

1-(*p*-Tolyl)-4,15-dihydro-1*H*-dibenzo[7,8:9,10][1,6]dioxecino[3,4-*d*][1,2,3]triazole **8**.

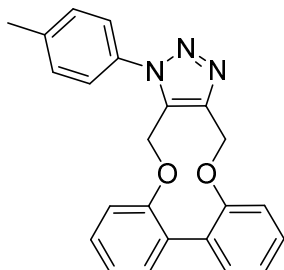

In a J. Young NMR tube 8,13-dioxatricyclo[12.4.0.0<sup>2,7</sup>]octadeca-1(14),2,4,6,15,17-hexaen-10-yne **1** (23.6 mg, 0.10 mmol) was dissolved in CDCl<sub>3</sub> (1 mL). Benzyl azide (13.3 mg, 0.10 mmol) was added and the mixture was heated to 60 °C. After 24 hours the volatiles were removed and the products was purified by flash chromatography on silica gel (eluent: Hexane/Et<sub>2</sub>O = 4:1 to 8:2) to give 1-(*p*-tolyl)-4,15-dihydro-1*H*-dibenzo[7,8:9,10][1,6]dioxecino[3,4-*d*][1,2,3]triazole **8** (34 mg, 0.92 mmol, 92%) as a colourless solid.

m.p. 194.5-195.6 °C.

IR<sub>(neat)</sub> 3054, 3034, 2954, 2880, 1606, 1593, 1572, 1517, 1499, 1480, 1455, 1442, 1390, 1365, 1340, 1304, 1285, 1264, 1240, 1212 cm<sup>-1</sup>.



$\delta_{\text{H}}$  (500 MHz,  $\text{CDCl}_3$ ) 7.36 - 7.44 (2H, m, ArH), 7.26 - 7.36 (5H, m, ArH), 7.18 - 7.23 (2H, m, ArH), 7.15 (1H, t,  $J = 7.5$  Hz, ArH), 7.03 (1H, d,  $J = 7.3$  Hz, ArH), 6.90 - 6.96 (1H, m, ArH), 5.67 (1H, d,  $J = 13.9$  Hz, CHH), 5.37 (1H, d,  $J = 13.9$  Hz, CHH), 5.30 (1H, d,  $J = 12.4$  Hz, CHH), 5.12 (1H, d,  $J = 12.5$  Hz, CHH), 2.45 (3H, s,  $\text{CH}_3$ ).

$\delta_{\text{C}}$  (125 MHz,  $\text{CDCl}_3$ ) 157.3 (C), 155.0 (C), 144.7 (C), 140.1 (C), 133.0 (C), 132.3 (C), 131.1 (C), 130.7 (CH), 130.2 (CH), 129.4 (C), 128.8 (CH), 124.7 (CH), 123.6 (CH), 122.0 (CH), 116.7 (CH), 113.5 (CH), 62.1 ( $\text{CH}_2$ ), 61.9 ( $\text{CH}_2$ ), 21.2 ( $\text{CH}_3$ ).

$m/z$  (ESI)  $[\text{M} + \text{H}]^+$ , 369.9;  $[\text{M} + \text{Na}]^+$ , 392.0.

HRMS (ESI-Q-TOF)  $m/z$ :  $[\text{M} + \text{Na}]^+$  Calcd for  $\text{C}_{23}\text{H}_{19}\text{N}_3\text{O}_2\text{Na}$  392.1369; Found 392.1364.

$^1\text{H}$  NMR (500 MHz,  $\text{CDCl}_3$ )

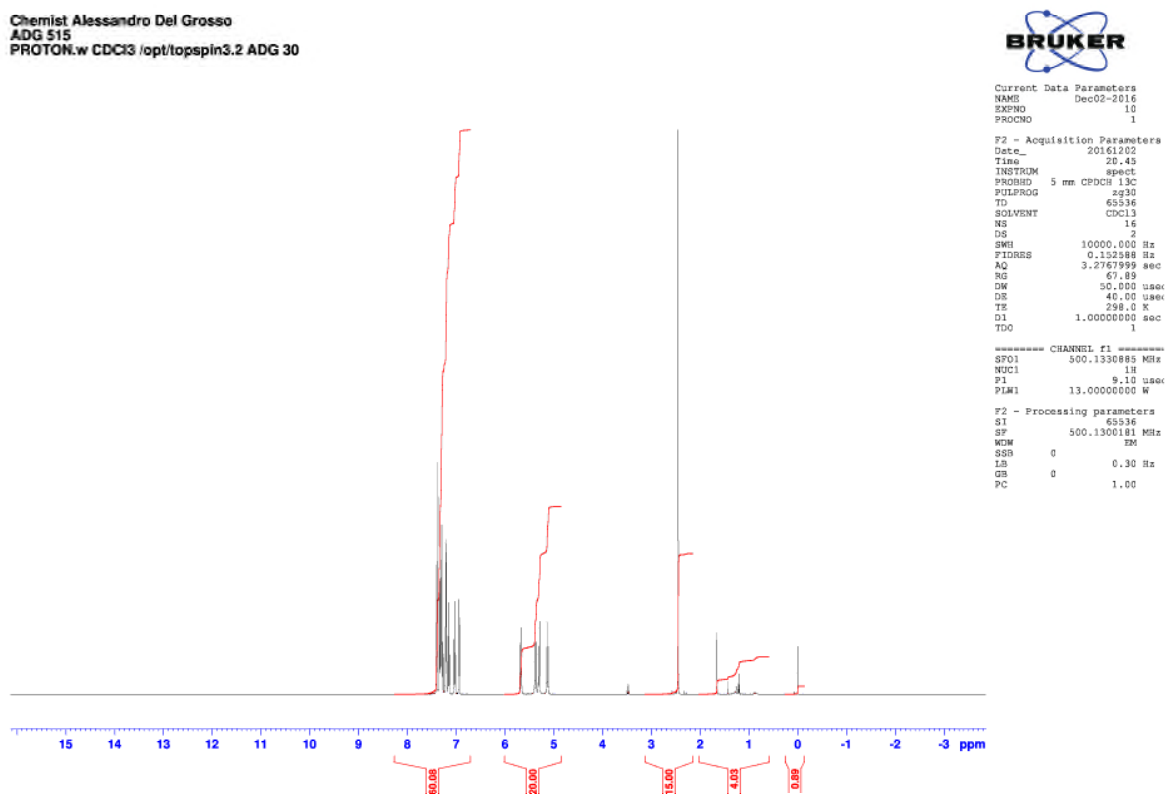

$^{13}\text{C}$  NMR (126 MHz,  $\text{CDCl}_3$ )



Chemist Alessandro Del Grosso  
ADG 515  
HSQC.w CDCl3 /opt/topspin3.2 ADG 22

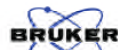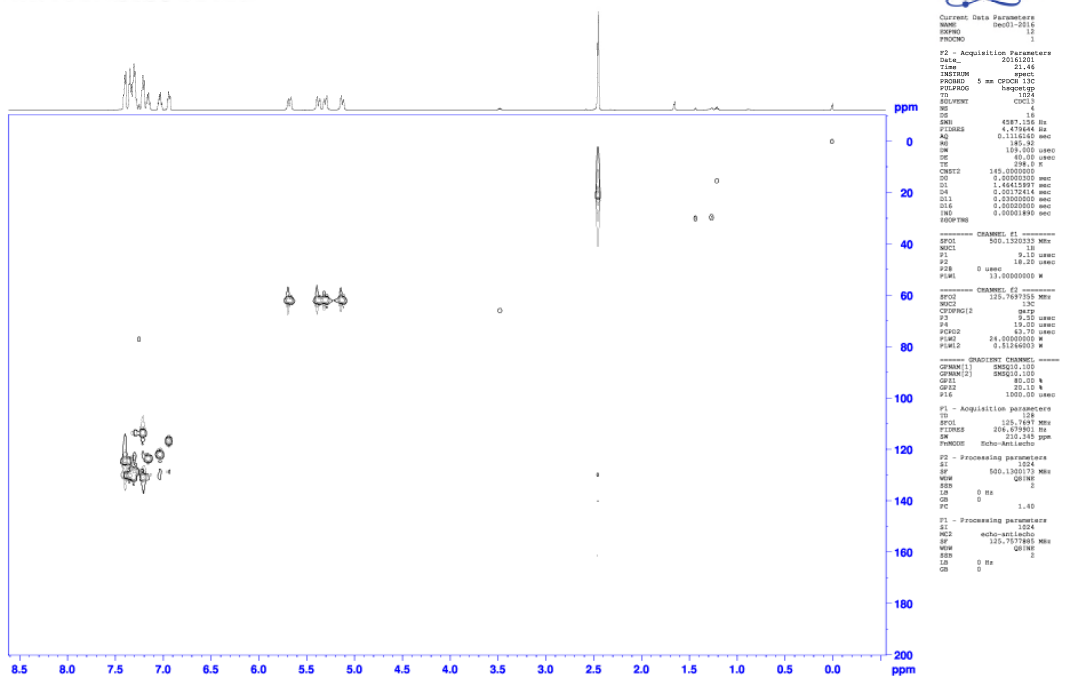

Chemist Alessandro Del Grosso  
ADG 515  
HMBC.w CDCl3 /opt/topspin3.2 ADG 22

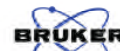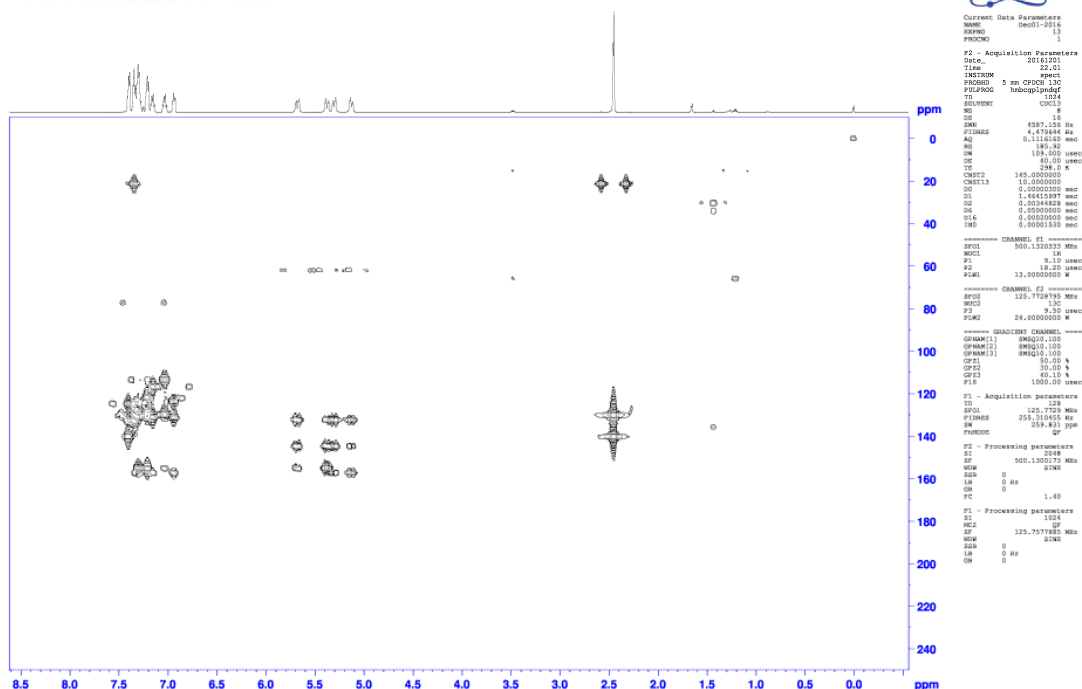

### Synthesis of compound 10.

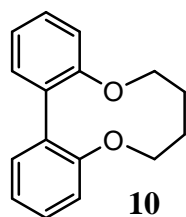

This is a known compound (a) Allen, D. W.; Braunton, P. N.; Millar, I. T.; Tebby, J. C. *J. Chem. Soc. C* **1971**, 3454-3468. B) Braunton, P. N.; Millar, I. T.; Tebby, J. C.; J. *Chem. Soc. Perkin II* **1972**, 138-412. c) Simpson, J. E.; Daub, G. H.; Hayes, F. N. *J. Org. Chem.* **1973**, 38, 1771. d) Surry, D. S.; Fox, D. J.; Macdonald, S. J. F.; Spring, D. R. *Chem. Commun.* **2005**, 2589-2590). The procedure used below was adapted from: Benniston, A. C.; Harriman, A.; Li, P.; Patel, P. V.; Sams, C. A. *J. Org. Chem.* **2006**, 71, 3481-3493. 1,4-Dibromobutane (484 mg, 2.20 mmol) was added dropwise to a stirred solution of 2,2'-biphenol (376 mg, 2.0 mmol) and  $K_2CO_3$  (560 mg, 4.00 mmol) in DMF (10 mL) at room temperature. The mixture was stirred overnight. At the end of this time, water (50 mL) was added followed by EtOAc (50 mL). The water phase was extracted with EtOAc (2 x 40 mL) and the combined organic extracts were then washed with water (3 x 40 mL). The solvent was removed using a rotary evaporator to yield a crude product which was purified by chromatography on silica gel (hexane/EtOAc, gradient from 100:1-75:25-50:50 in increments). This yielded product **10** as a white crystalline solid (398 mg, 1.64 mmol, 82%).

TLC: Silica gel, 4:1 hexane:EtOAc,  $R_f$  0.85, uv and  $KMnO_4$  to visualise.

Mp 109-110 °C.

$IR_{(neat)}$  1434 1261, 1228, 939, 756  $cm^{-1}$ .

$\delta_H$  (400 MHz,  $CDCl_3$ ) 7.45-7.40 (4H, m, ArH), 7.10-7.00 (4H, m, ArH), 4.55-4.50 (4H, m,  $OCH_2$ ), 4.25-4.20 (4H, m,  $OCH_2$ ), 2.00-1.85 (4H, m,  $CH_2CH_2$ ).

$\delta_C$  (100 MHz,  $CDCl_3$ ) 157.06 (C), 131.30 (CH), 129.61 (C), 128.53 (CH), 121.83 (CH), 115.79 (CH), 70.96 ( $CH_2$ ), 27.15 ( $CH_2$ ).

$m/z$  (CI) 241.1 ( $M^+ + H$ , 65%), 263 ( $M^+ + Na$ , 95%).

HRMS (found (EI<sup>+</sup>):  $M^+ + Na$ , 263.1038.  $C_{16}H_{16}O_2Na$  requires  $M^+ + Na$ , 263.1043, 1.5 ppm error).

$^1H$  NMR (400 MHz,  $CDCl_3$ ).

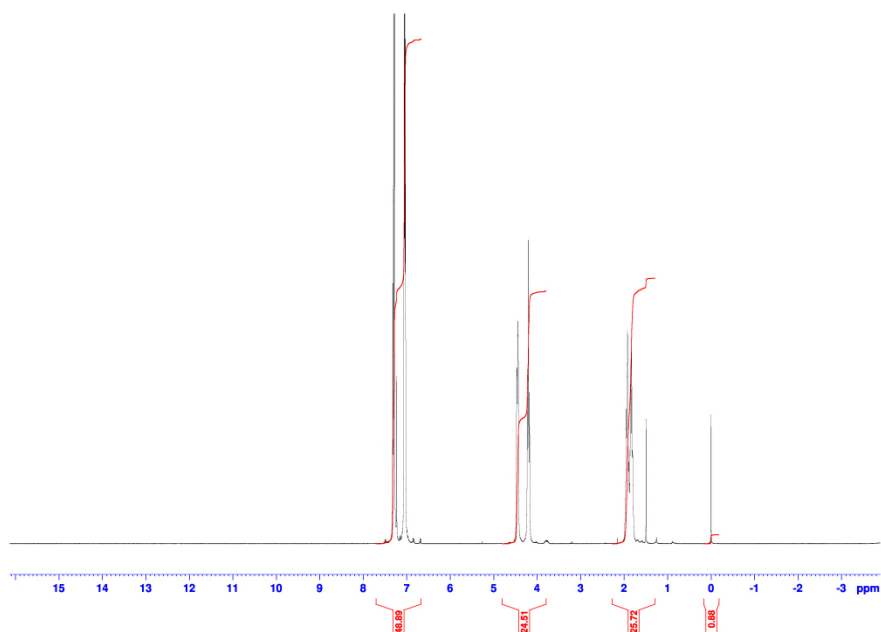

```

Current Data Parameters
NAME          Mer21      016
EXPNO         20
PROCNO        1
-----
F2 - Acquisition Parameters
Date_         20160923
Time          22.07 h
INSTRUM       spect
PROBHD        ZN0618_0
PULPROG       zg30
PC            63.16
SOLVENT       CDCl3
DS            16
NS            2
SWH           8012.820 Hz
AQ            0.122266 sec
FIDRES        4.048440 Hz
RG            79.55
DE            6.00 usec
RG            6.00 usec
DS            298.0 K
O1            1.0000000 sec
TD0           1
SF            400.1324708 MHz
NUC1          131
P1            14.00 usec
PL1           12.92099953 W
-----
F2 - Processing parameters
SI            32768
SF            400.130216 MHz
WDW           EM
GB            0
GB2           0
PC            1.00

```

 $^{13}\text{C}$  NMR (100 MHz,  $\text{CDCl}_3$ )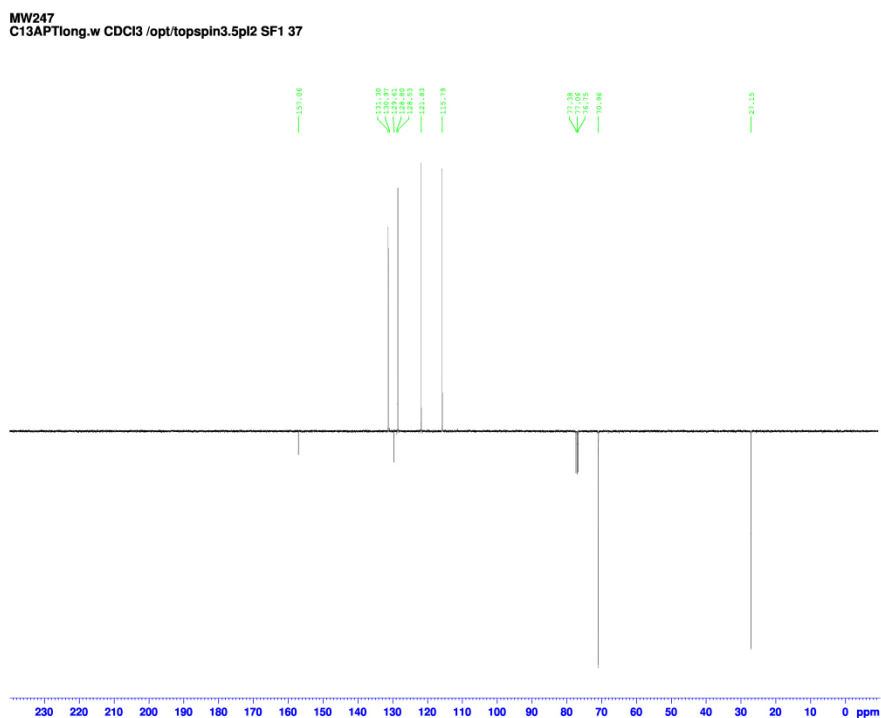

|                             |                 |
|-----------------------------|-----------------|
| Current Data Parameters     |                 |
| NAME                        | Mar23-2016      |
| EXPNO                       | 21              |
| PROCNO                      | 1               |
| P2 - Acquisition Parameters |                 |
| Time                        | 20160323        |
| Time2                       | 22.37           |
| PROBHD                      | 21016814_0444   |
| PROBHD                      | 1               |
| TD                          | 65336           |
| EXPONENT                    | 1               |
| NS                          | 512             |
| DS                          | 4               |
| RG                          | 26041.666 Hz    |
| FIDRES                      | 0.3973664 Hz    |
| 1D                          | 1.00000000      |
| TD                          | 201612          |
| DS                          | 19.2500         |
| RG                          | 598.0 X         |
| TR                          | 19.2500         |
| EXP2                        | 145.00000000    |
| ENFT11                      | 2.00000000      |
| EXP2                        | 1.00000000      |
| D2D2                        | 0.00089635 sec  |
| TD2                         | 100.6284812 Hz  |
| NS1                         | 136             |
| DS1                         | 1               |
| P2                          | 100.00000000    |
| EXP2                        | 47.35000000     |
| SP02                        | 401.3316005 MHz |
| EXP2                        | 1H              |
| EXP2                        | malzelix6       |
| PCP02                       | 12.95000000     |
| EXP2                        | 0.30532719 W    |
| P2 - Processing parameters  |                 |
| NAME                        | 312768          |
| EXP                         | 100.61280000    |
| WDW                         | EM              |
| SSB                         | 0               |
| LB                          | 0 1.00 Hz       |
| GC                          | 0 1.40          |

**Synthesis of compound 16;** 8,13-dioxatricyclo[12.4.0.0<sup>2,7</sup>]octadeca-1(18),2(7),3,5,14,16-hexaen-10-yn-4-ylmethanol **16**.

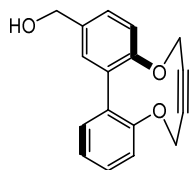

In a Schlenk tube under a nitrogen atmosphere, compound **11** (50 mg, 0.17 mmol) was dissolved in THF (1 mL). The solution was cooled to -78 °C and DiBAL-H (0.17 mmol, 2 M solution in hexane) was added dropwise. The mixture was degassed, stirred at -78 °C for 1 hour. The mixture was warmed to room temperature. After 2 hours, water (5 mL) and HCl (2-3 mL) were added and the product was extracted with ethyl acetate (3 x 15 mL). The organic extracts were dried over magnesium sulphate. The solvent was removed under reduced pressure to give the product **16** (31 mg, 0.117 mmol, 69%) as a brown solid.

TLC: Silica gel, 1:4 Hexane: EtOAc, R<sub>f</sub> 0.18.

IR<sub>(neat)</sub> 3391, 2913, 2863, 1449, 1189, 1105, 966 cm<sup>-1</sup>.

$\delta_{\text{H}}$  (CDCl<sub>3</sub>, 500 MHz) 7.40-7.35 (2H, m, ArH), 7.20-7.10 (5H, m, ArH), 4.66 (2H, s, HOCH<sub>2</sub>), 4.54-4.47 (2H, m, OCH<sub>2</sub>), 4.31 (2H, brd,  $J = 14.0$ , OCH<sub>2</sub>), 2.05 (1H, d,  $J = 12.1$ , OH)

$\delta_{\text{C}}$  (CDCl<sub>3</sub>, 125 MHz) 154.4 (C), 153.9 (C), 136.8 (C), 135.9 (C), 135.8 (C), 132.0 (CH), 130.7 (CH), 129.2 (CH), 127.9 (CH), 124.3 (CH), 122.7 (CH), 122.7 (CH), 86.7 (C triple), 86.7 (C triple), 64.8 (OCH<sub>2</sub>), 63.6 (HOCH<sub>2</sub>). Note; two CH<sub>2</sub> groups are overlapped.

$m/z$  (ESI) 289 (M<sup>+</sup> + Na, 100).

HRMS (ESI-Q-TOF)  $m/z$ : [M + Na]<sup>+</sup> Calcd for C<sub>17</sub>H<sub>14</sub>O<sub>3</sub>Na 289.0835; Found 289.0837.

<sup>1</sup>H NMR (CDCl<sub>3</sub>, 500 MHz)

Chemist Lavrentis Galanopoulos  
LG024/500  
PROTON.w CDCl<sub>3</sub> /opt/topspin3.2 LG 36

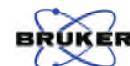

Current Data Parameters  
NAME Jul08-2016  
EXPNO 10  
PROCNO 1

F2 - Acquisition Parameters  
Date\_ 20160708  
Time 20.48  
INSTRUM spect  
PROBHD 5 mm CPDCH 13C  
PULPROG zg30  
TD 65536  
SOLVENT CDCl<sub>3</sub>  
NS 16  
DS 2  
SWH 10000.000 Hz  
FIDRES 0.132888 Hz  
AQ 3.2767999 sec  
RG 60.07  
DM 50.000 usec  
DE 40.00 usec  
TE 298.0 K  
D1 1.00000000 sec  
TDO 1

===== CHANNEL f1 =====  
SFO1 500.1330885 MHz  
NUC1 1H  
P1 9.10 usec  
PLW1 13.00000000 W

F2 - Processing parameters  
SI 65536  
SF 500.1300150 MHz  
WDW EM  
SSB 0  
LB 0.30 Hz  
GB 0  
PC 1.00

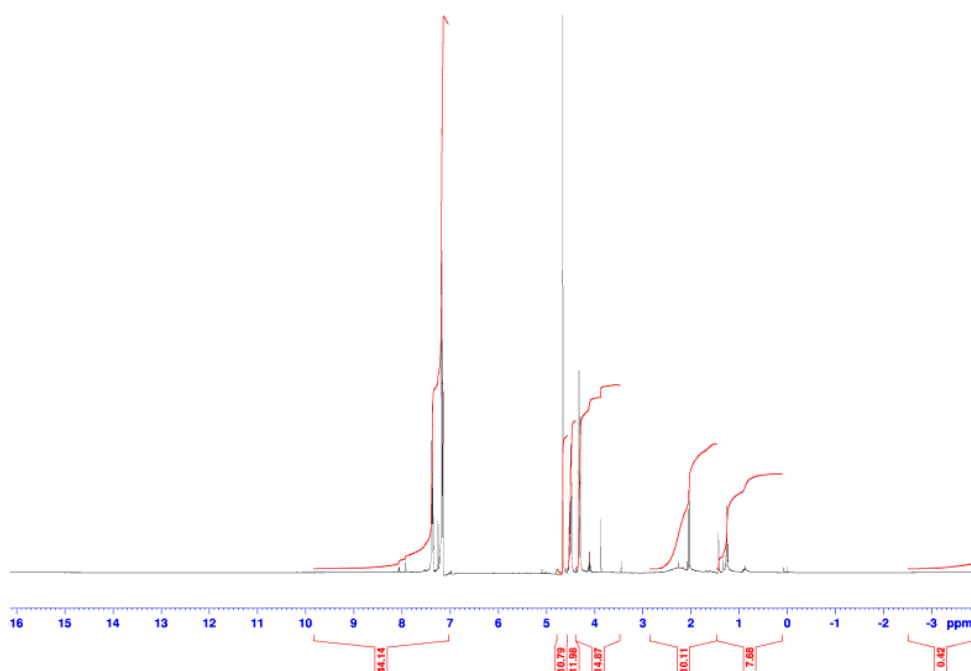

<sup>13</sup>C NMR (CDCl<sub>3</sub>, 125 MHz).

Chemist Lavrentis Galanopoulos  
LG024/500  
C13APT.w CDCl<sub>3</sub> /opt/topspin3.2 LG 36

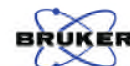

Current Data Parameters  
NAME Jul08-2016  
EXPNO 11  
PROCNO 1

F2 - Acquisition Parameters  
Date\_ 20160708  
Time 21.02  
INSTRUM spect  
PROBHD 5 mm CPDCH 13C  
PULPROG jmod  
TD 65536  
SOLVENT CDCl<sub>3</sub>  
NS 256  
DS 4  
SWH 32894.738 Hz  
FIDRES 0.501934 Hz  
AQ 0.9961472 sec  
RG 185.52  
DM 15.200 usec  
DE 66.43 usec  
TE 298.0 K  
CNST2 145.0000000  
CNST11 1.0000000  
D1 2.00000000 sec  
D20 0.00689655 sec  
TDO 1

===== CHANNEL f1 =====  
SFO1 125.7728795 MHz  
NUC1 13C  
P1 9.30 usec  
P2 19.00 usec  
PLW1 24.00000000 W

===== CHANNEL f2 =====  
SFO2 500.1320005 MHz  
NUC2 1H  
CPDPRG2 waltz16  
PCPD2 65.00 usec  
PIW2 13.00000000 W  
PLW12 0.26784000 W

F2 - Processing parameters  
SI 32768  
SF 125.7577885 MHz  
WDW RM  
SSB 0  
LB 1.00 Hz  
GB 0  
PC 1.40

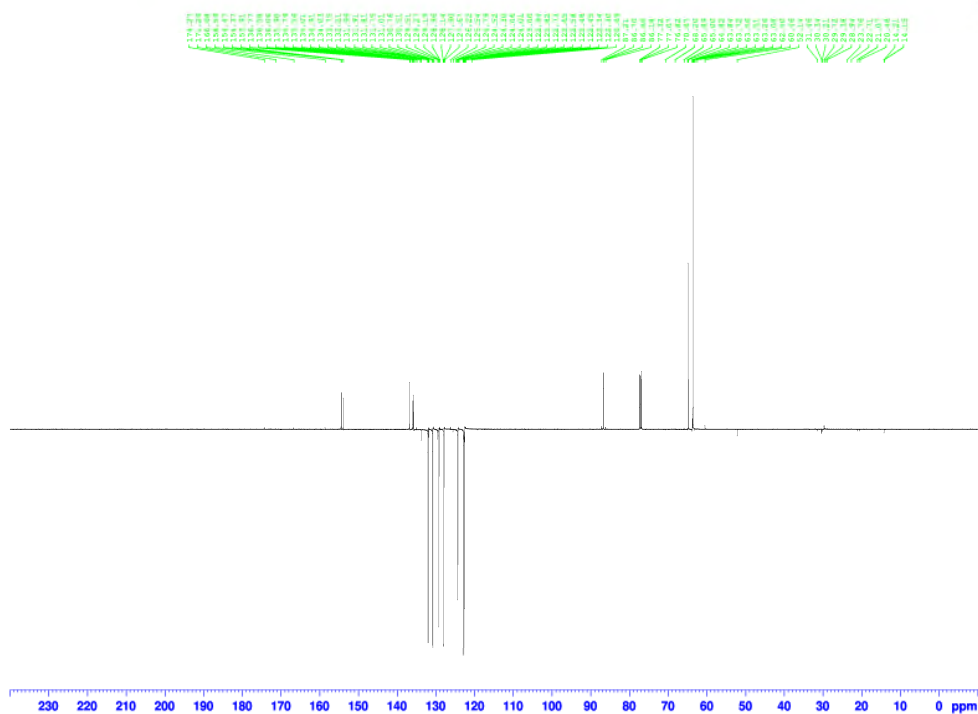

### Reactions of activated ester **14** with peptide and proteins, followed by addition of benzyl azide.

FT-ICR MS experiments were run to test if compound **14** could react with and conjugate to the peptides; substance P, Lys 8 vasopressin and Lys 3 bombesin. This was achieved by combining a 1 mM solution of each peptide with 1, 2 and 3 equivalents respectively of **14**. The final concentrations of the peptide and the binding agent are summarised in Table 1. However due to competing hydrolysis of the activated ester, full functionalisation was not anticipated.

**Table 1.**

| Entry | Peptide     | Concentration of peptide | Concentration of <b>14</b> | Ratio of peptide to <b>14</b> |
|-------|-------------|--------------------------|----------------------------|-------------------------------|
| 1     | Substance P | 0.67 mM                  | 0.67 mM                    | 1:1                           |
| 2     | Substance P | 0.50 mM                  | 1.00 mM                    | 1:2                           |
| 3     | Substance P | 0.40 mM                  | 1.20 mM                    | 1:3                           |
| 4     | vasopressin | 0.67 mM                  | 0.67 mM                    | 1:1                           |
| 5     | vasopressin | 0.50 mM                  | 1.00 mM                    | 1:2                           |
| 6     | vasopressin | 0.40 mM                  | 1.20 mM                    | 1:3                           |
| 7     | bombesin    | 0.67 mM                  | 0.67 mM                    | 1:1                           |
| 8     | bombesin    | 0.50 mM                  | 1.00 mM                    | 1:2                           |
| 9     | bombesin    | 0.40 mM                  | 1.20 mM                    | 1:3                           |

### Reaction of activated ester **14** with peptides:

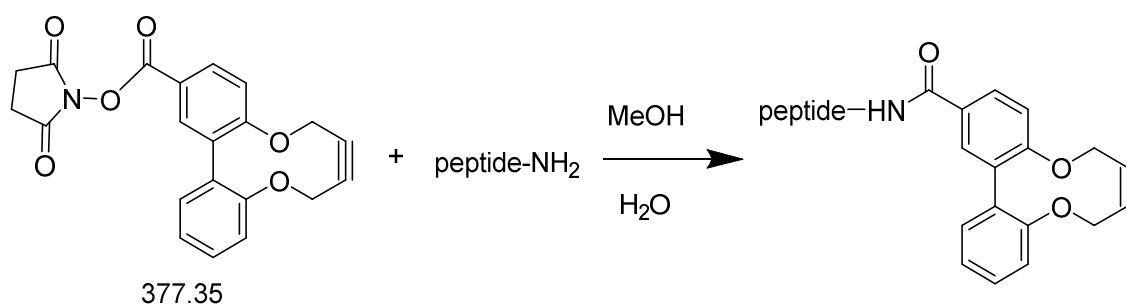



In a round bottom flask, compound **14** (7.5 mg, 0.019 mmol) was dissolved in MeOH/H<sub>2</sub>O (50%-50%, 10 mL) to create a 2 mM stock solution. Solutions of three peptides (1 mM solutions of Substance P, Lys 8 Vasopressin, Lys 3 Bombesin) were prepared. To portions of 100  $\mu$ L of each peptide solution was added respectively 50  $\mu$ L, 100  $\mu$ L and 150  $\mu$ L of the solution of compound **7** to create the following solutions respectively; i) 0.67 mM peptide + 0.67 mM ester (1:1), ii) 0.50 mM peptide + 1 mM ester (1:2) and iii) 0.40 mM peptide + 1.2 mM ester (1:3) respectively. The solutions were allowed to stand at room temperature for 1 day and were then analysed by FT-ICR MS.

#### Reaction of peptide from reaction above with benzyl azide.

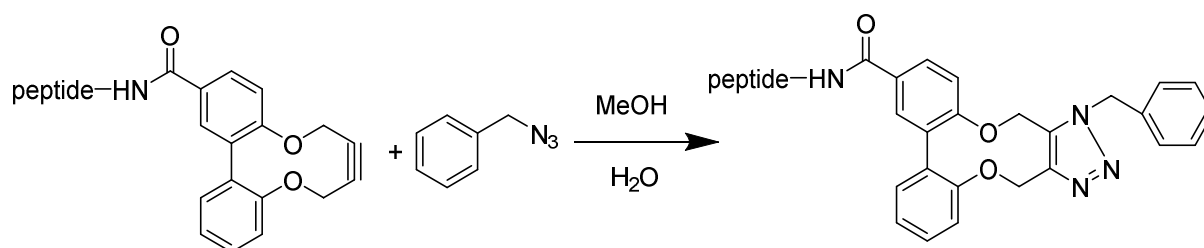

In a round bottom flask, PhCH<sub>2</sub>N<sub>3</sub> (250  $\mu$ L, 2 mmol) was dissolved in MeOH/H<sub>2</sub>O (50%-50%, 10 mL) to create a 0.2 M stock solution. Volumes of 0.25 mL, 0.50 mL and 0.75 mL of this solution were added to the previously prepared 1:1, 1:2 and 1:3 solutions of each peptide respectively. The solutions were allowed to stand at room temperature for 7 days and were then analysed by FT-ICR MS.

#### Reaction between compound **14** and myoglobin.

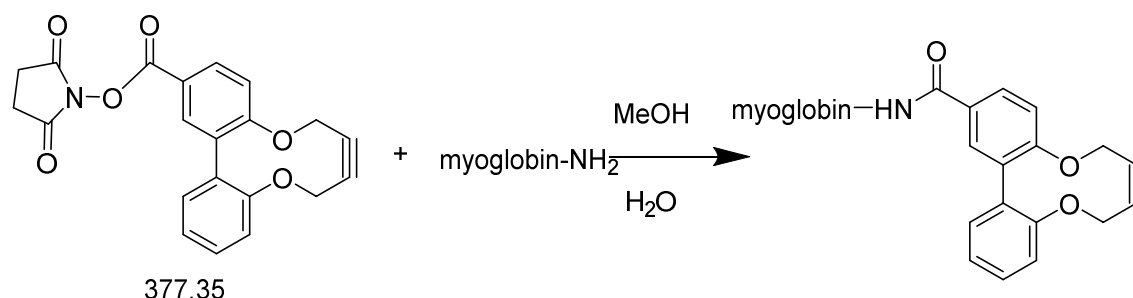

In a round bottom flask, compound **14** (7.5 mg, 0.019 mmol) was dissolved in MeOH/H<sub>2</sub>O (50%-50%, 10 mL) to create a 2 mM stock solution. Myoglobin (8.45 mg) was dissolved in 0.5 mL ultra-pure water. The stock myoglobin solution was left in the vortexer for 5 min and afterwards put in the centrifuge for stirring at 14.000 rpm for 5 min. To portions of 100  $\mu$ L of myoglobin solution was added respectively

50  $\mu$ L, 100  $\mu$ L and 150  $\mu$ L of the solution of compound **14** to create the following solutions respectively; i) 0.67 mM protein + 0.67 mM ester (1:1), ii) 0.50 mM protein + 1 mM ester (1:2) and iii) 0.40 mM protein + 1.2 mM ester (1:3) respectively. The solutions were allowed to stand at room temperature for 1 day and were then analysed by FT-ICR MS.

#### Reaction of functionalised myoglobin with benzyl azide.

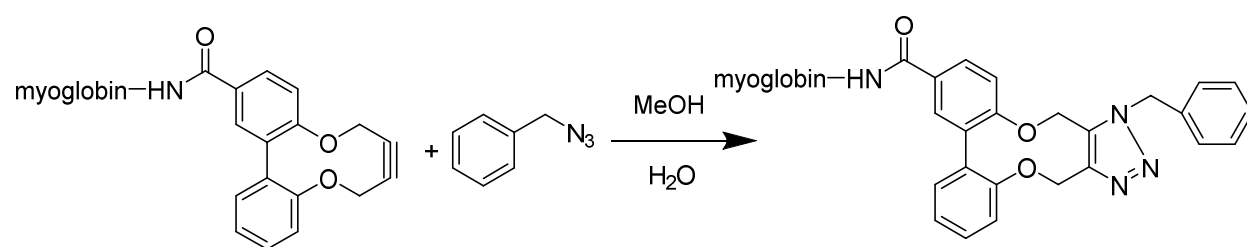

In a round bottom flask,  $\text{PhCH}_2\text{N}_3$  (250  $\mu$ L, 2 mmol) was dissolved in MeOH/ $\text{H}_2\text{O}$  (50%-50%, 10 mL) to create a 0.2 M stock solution. Volumes of 0.25 mL, 0.50 mL and 0.75 mL of this solution were added to the 1:1, 1:2 and 1:3 solutions of each peptide respectively. The solutions were allowed to stand at room temperature for 7 day and were then analysed by FT-ICR MS.

#### Mass spectra of products from peptide and protein conjugation studies.

##### Substance P.

The mass spectra (MS) of substance P with and without the addition of compound **14** are presented in Figures 1 and 2 respectively. The data was obtained with the 1:2 ratio mixture (Table 1 entry 2) is illustrated. The comparison of the shapes illustrates the form of a new peak at the latter MS spectrum. This peak at 805.40393 corresponds to the peptide bound with the conjugation agent **14** [Substance P + alkyne +  $2\text{H}$ ] $^{2+}$ . Furthermore, this was verified by creating a mathematical simulation and comparing it with the experimental isotope pattern.

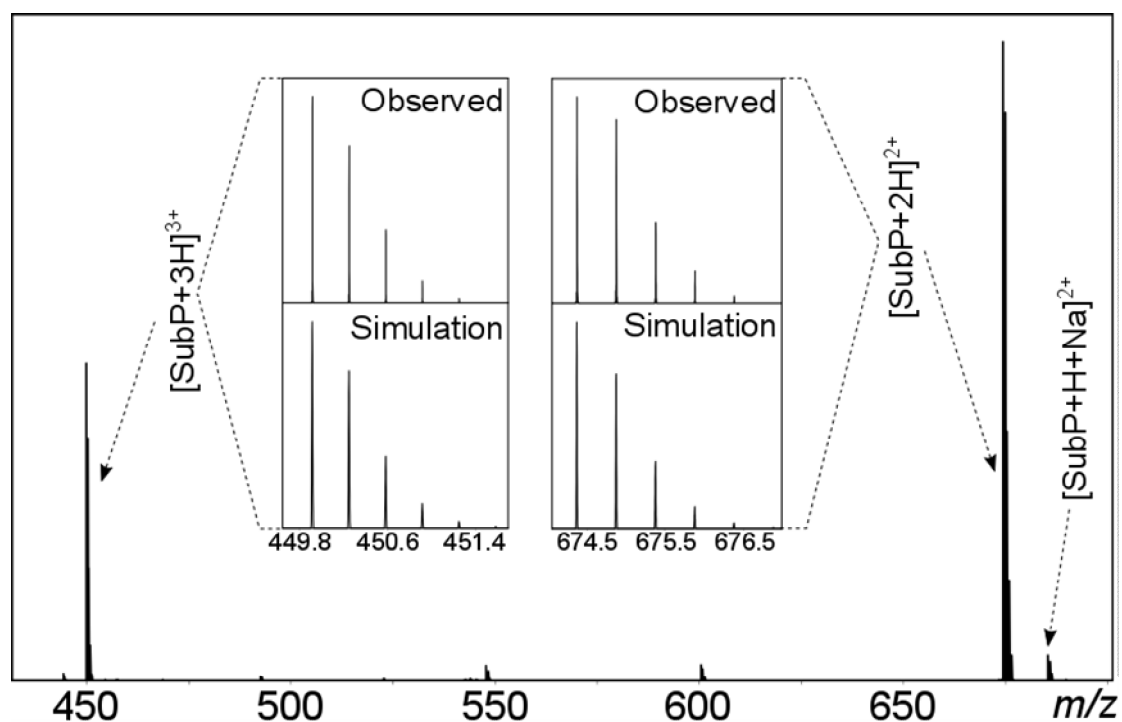

Figure 1. The mass spectrum of Substance P (Sub P) without adding compound **14**.

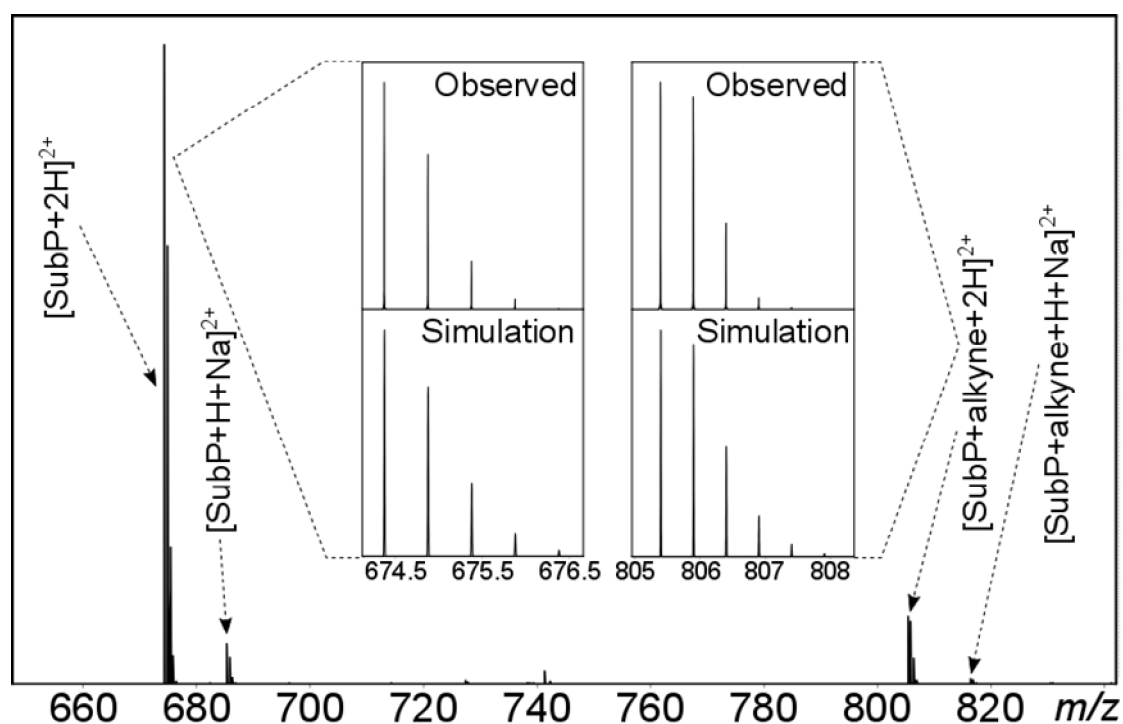

Figure 2: The mass spectrum of Substance P (Sub P) with compound **14** ('alkyne').  
On the top right, the comparison of the experimental result with the simulation is shown.

After verifying that the conjugation agent **14** was attached to the peptide, the position which is bonded the molecule was examined, to determine, the amino acid which is attached to the agent. Therefore, a MS/MS experiment was run. The MS/MS spectrum revealed a  $b_3$ ,  $b_6$ ,  $b_7$ ,  $b_8$ ,  $b_{10}$  and an  $y_{10}$  ion of substance P attached to **14**. Based on this outcome, a fragmentation map was created (Figure 3). As indicated in Figure 3, lysine and proline are the potential bindings sites of the peptide. This goes to pinpoint that the primary assumption was valid and the molecule actually binds to the lysine.

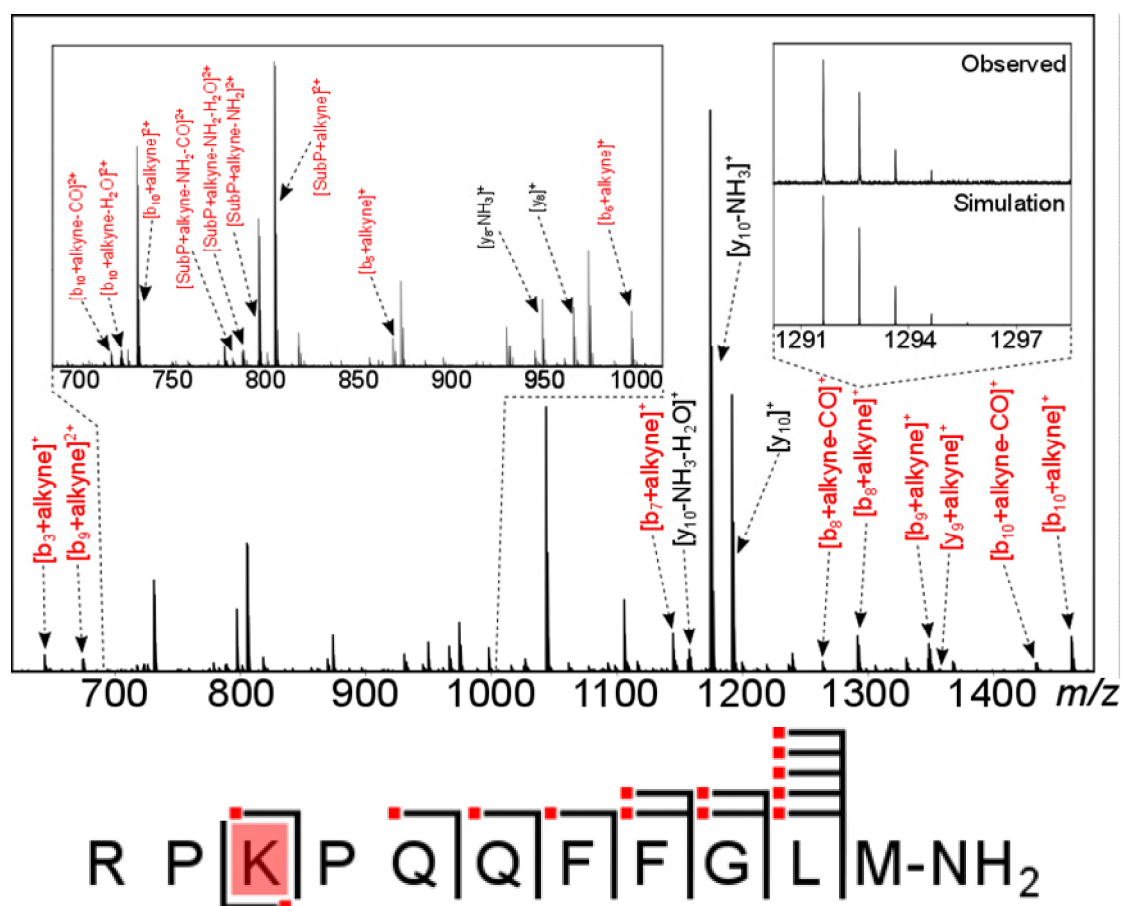

| Assignment                   | Theoretical $m/z$ | Observed $m/z$ | Error/ ppm |
|------------------------------|-------------------|----------------|------------|
| $[b_3+alkyne]^+$             | 644.319109        | 644.31911      | 0.00       |
| $[b_9+alkyne]^{2+}$          | 674.827298        | 674.82713      | -0.25      |
| $[b_{10}+alkyne-CO]^{2+}$    | 717.371872        | 717.37164      | -0.32      |
| $[b_{10}+alkyne-H_2O]^{2+}$  | 722.364047        | 722.36406      | 0.02       |
| $[b_{10}+alkyne]^{2+}$       | 731.36933         | 731.37         | 0.92       |
| $[SubP+alkyne-NH_2-CO]^{2+}$ | 782.892115        | 782.89187      | -0.31      |

|                                |             |            |       |
|--------------------------------|-------------|------------|-------|
| $[SubP+alkyne-NH_2-H_2O]^{2+}$ | 787.88429   | 787.88402  | -0.34 |
| $[SubP+alkyne-NH_2]^{2+}$      | 796.889572  | 796.89001  | 0.55  |
| $[b5+alkyne]^+$                | 869.43045   | 869.43027  | -0.21 |
| $[y8-NH_3]^+$                  | 949.460035  | 949.46024  | 0.22  |
| $y8^+$                         | 966.486585  | 966.48658  | -0.01 |
| $[b6+alkyne]^+$                | 997.489207  | 997.48923  | 0.02  |
| $[b7+alkyne]^+$                | 1144.557441 | 1144.55782 | 0.33  |
| $[y10-NH_3-H_2O]^+$            | 1156.597198 | 1156.59741 | 0.18  |
| $[y10-NH_3]^+$                 | 1174.607762 | 1174.60767 | -0.08 |
| $y10^+$                        | 1191.634312 | 1191.63482 | 0.43  |
| $[b8+alkyne-CO]^+$             | 1263.630941 | 1263.63106 | 0.09  |
| $[b8+alkyne]^+$                | 1291.625855 | 1291.62651 | 0.51  |
| $[b9+alkyne]^+$                | 1348.647319 | 1348.64822 | 0.67  |
| $[y9+alkyne]^+$                | 1356.644542 | 1356.64546 | 0.68  |
| $[b10+alkyne-CO]^+$            | 1433.736468 | 1433.73578 | -0.48 |
| $[b10+alkyne]^+$               | 1461.731383 | 1461.73207 | 0.47  |
| Absolute average               |             |            | 0.32  |
| Standard deviation             |             |            | 0.38  |

Figure 3: The fragmentation map of Substance P with compound **14** based on the MS/MS spectrum (above), and the MS/MS mass error listing.

Excess azide was added to the sample (ca. 0.1 M solution), and it was left for one week at room temperature. The mass spectrum (Figure 4) with the addition of the azide showed the absence of the peak at 805.40393 and the formation of a peak at 871.93351. This peak indicates to  $[Substance\ P + \mathbf{14} + C_7H_7N_3 + 2H]^{2+}$  and it is confirmed by the comparison of the mathematical simulation with the experimental isotope pattern. By the absence of the peak 805.39641 that all of the substance P-**14** adduct had reacted with the azide.

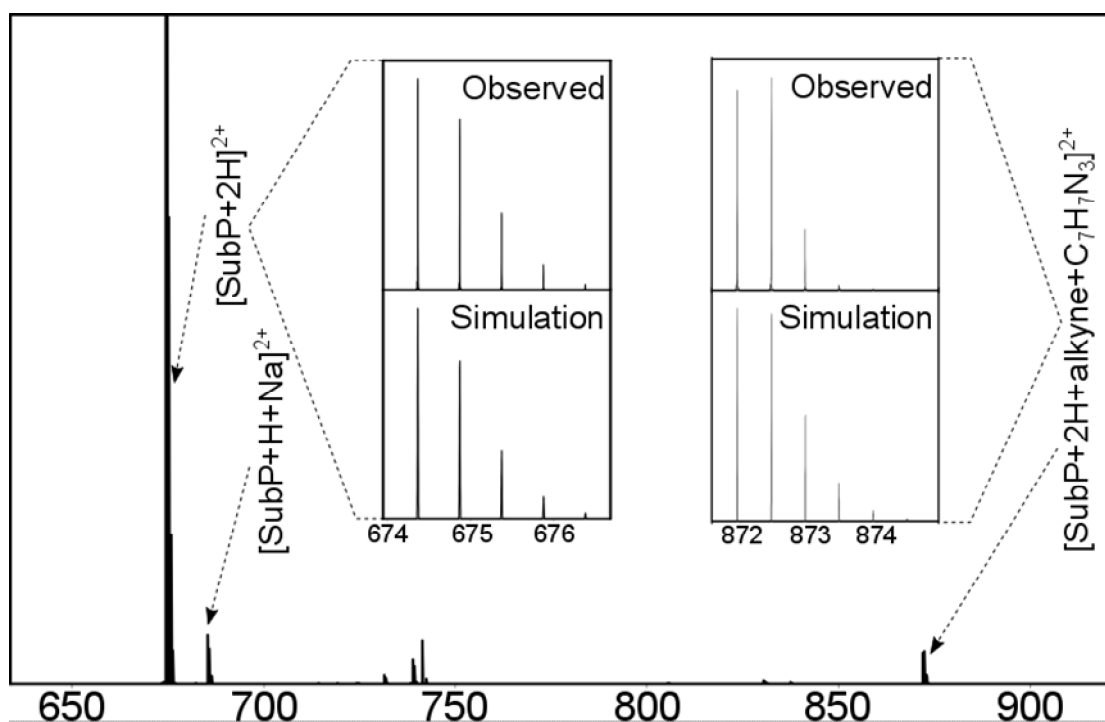

Figure 4: The mass spectrum of Substance P (Sub P) with compound **14** ('alkyne') and azide ( $\text{C}_7\text{H}_7\text{N}_3$ ). The comparison of the experimental result with the simulation is shown.

An illustration with the three spectra is shown in Figure 5. A peak at 805.39641 appeared after the addition of compound **14**. In addition, a new peak at 871.93351 was formed as a result of the addition of the azide.

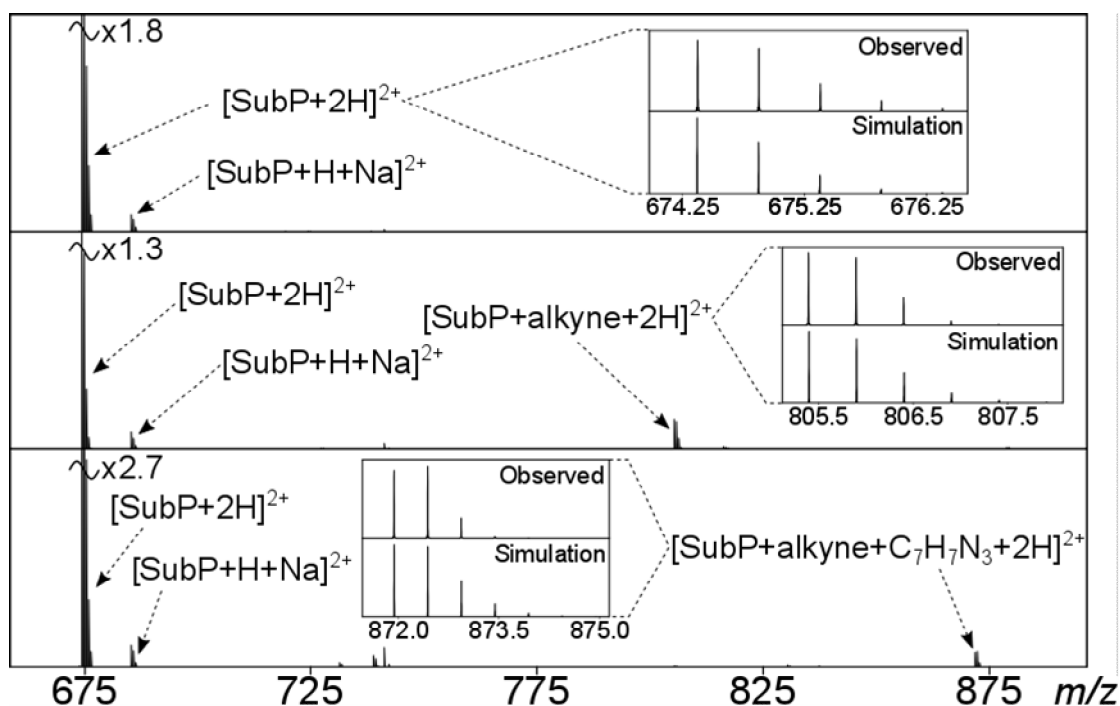

Figure 5: The three mass spectra of Substance P (Sub P). The first one is without compound **14**, the second with the addition of compound **14** ('alkyne') and the last with the addition of both compound **14** and the azide ( $\text{C}_7\text{H}_7\text{N}_3$ ).

### Lys 8 Vasopressin.

The mass spectra of Lys 8 Vasopressin were obtained with and without the addition of compound **14** (Figures 6 and 7 respectively). The result obtained with the 1:1 ratio mixture (Table 1, entry 4) is illustrated. In Figure 7, a peak at 670.73929 has appeared which indicates the binding of **14** with the peptide  $[\text{K8Vaso} + \text{'alkyne'} + \text{H} + \text{Na}]^{2+}$ . The experimental isotope pattern matched the mathematical simulation.

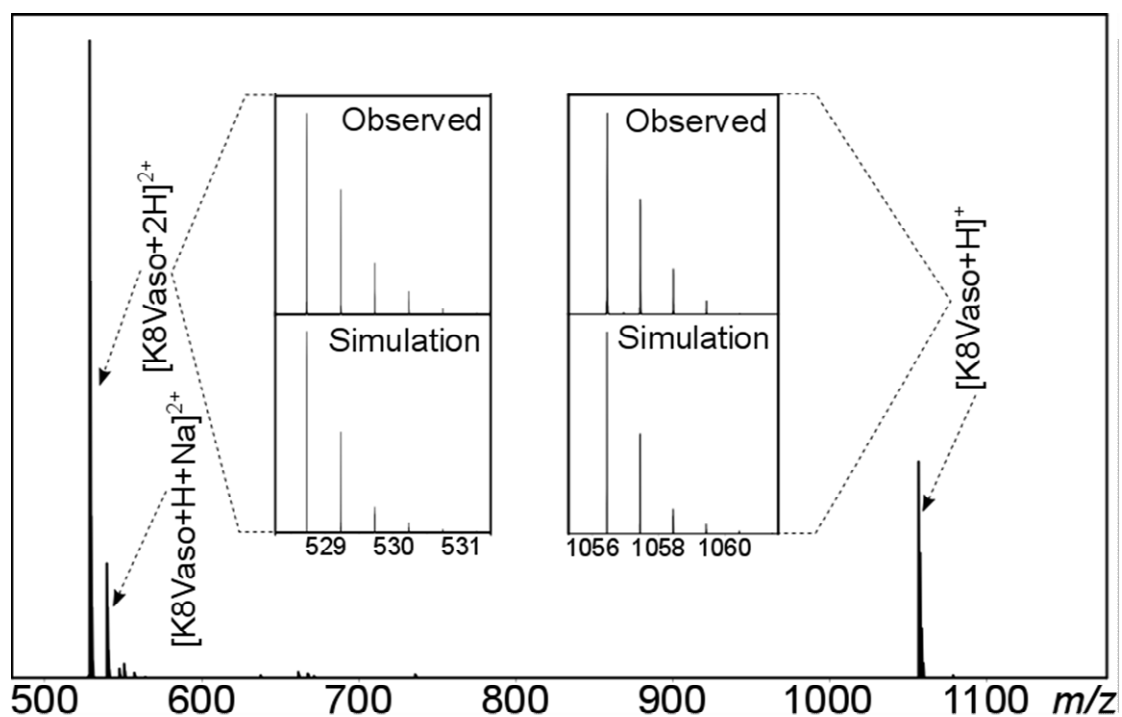

Figure 6: The mass spectrum of Lys 8 Vasopressin (K8Vaso) without adding compound 14.

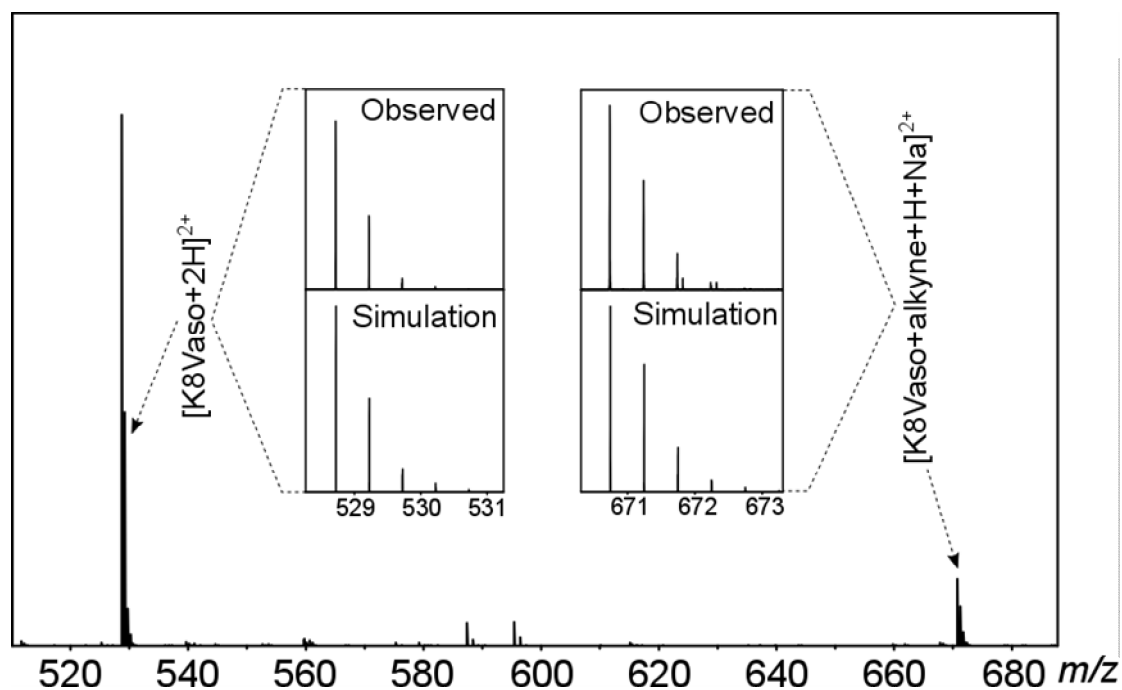

Figure 7: The mass spectrum of Lys 8 Vasopressin (K8Vaso) with compound 14 ('alkyne'). On the top right, the comparison of the experimental result with the simulation is shown.



As before, it was assumed that **14** is bound to the lysine. An MS/MS experiment was run to investigate this assumption. The MS/MS revealed a  $y_3$  ion of the protein attached to **14**. A fragmentation map was created (Figure 8) based on this outcome. As is illustrated, there are only one fragment with the conjugation agent attached. This is due to the cysteine bond; it is difficult to break a cysteine bond by collisionally activated dissociation (CAD). The possible binding sites are the lysine, proline and glutamine. It can be assumed based on proline's and glutamine's structure that the binding couldn't occur to these residues. Therefore, based on the above there are one possible binding site, i.e. the lysine residue.

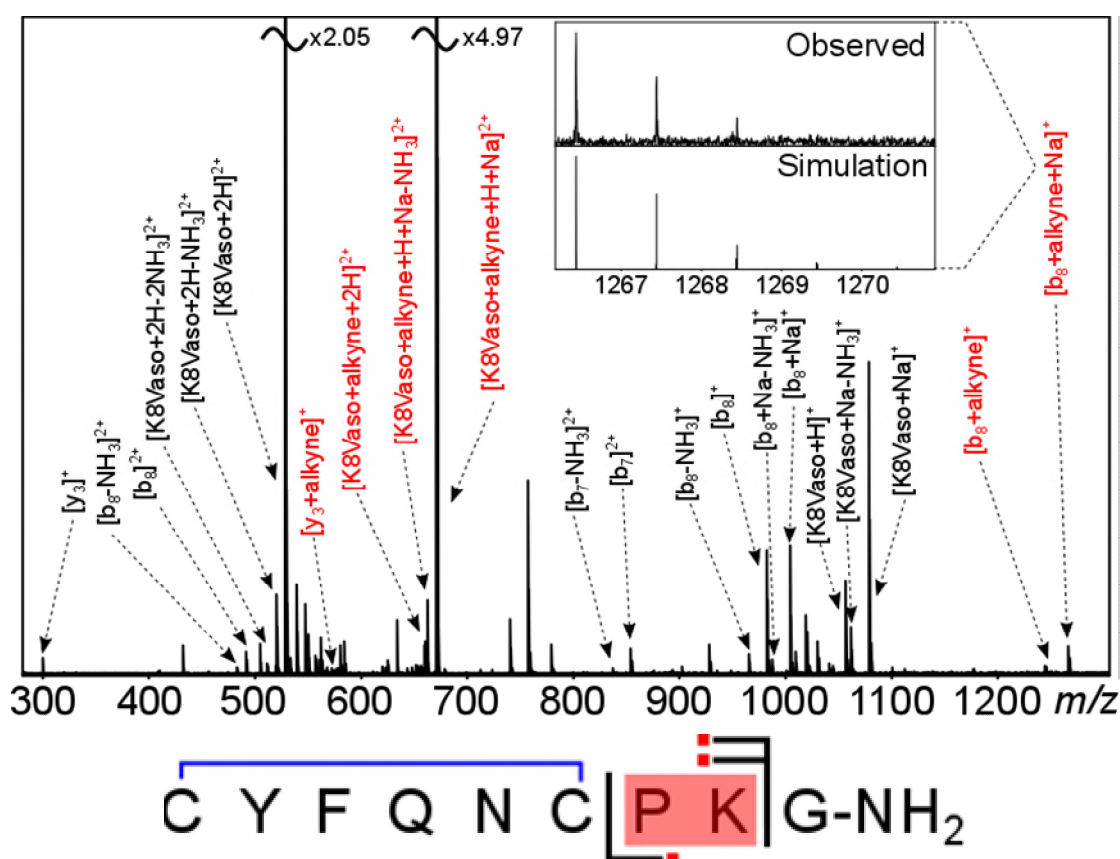

| Assignment                | Theoretical m/z | Observed m/z | Error/ ppm |
|---------------------------|-----------------|--------------|------------|
| $y_3^+$                   | 300.203016      | 300.20302    | 0.01       |
| $[b_8-NH_3]^{2+}$         | 483.185848      | 483.18581    | -0.08      |
| $b_8^{2+}$                | 491.699         | 491.699123   | 0.25       |
| $[K_8Vaso+2H-2NH_3]^{2+}$ | 511.69658       | 511.69661    | 0.06       |
| $[K_8Vaso+2H-NH_3]^{2+}$  | 520.209855      | 520.20988    | 0.05       |
| $[K_8Vaso+2H]^{2+}$       | 528.723129      | 528.72316    | 0.06       |

|                                                   |             |            |       |
|---------------------------------------------------|-------------|------------|-------|
| [y3+alkyne] <sup>+</sup>                          | 562.26601   | 562.26599  | -0.04 |
| [K8Vaso+alkyne] <sup>2+</sup>                     | 659.754627  | 659.75473  | 0.16  |
| [K8Vaso+alkyne+Na-NH <sub>3</sub> ] <sup>2+</sup> | 662.232324  | 662.23231  | -0.02 |
| [K8Vaso+alkyne+Na] <sup>2+</sup>                  | 670.745599  | 670.74556  | -0.06 |
| [b7-NH <sub>3</sub> ] <sup>+</sup>                | 837.269458  | 837.26959  | 0.16  |
| b7 <sup>+</sup>                                   | 854.296007  | 854.29603  | 0.03  |
| [b8-NH <sub>3</sub> ] <sup>+</sup>                | 965.364421  | 965.36446  | 0.04  |
| b8 <sup>+</sup>                                   | 982.39097   | 982.3911   | 0.13  |
| [b8+Na-NH <sub>3</sub> ] <sup>+</sup>             | 987.346365  | 987.34643  | 0.07  |
| [b8+Na] <sup>+</sup>                              | 1004.372914 | 1004.37315 | 0.23  |
| [K8Vaso+H] <sup>+</sup>                           | 1056.438982 | 1056.43942 | 0.41  |
| [K8Vaso+Na-NH <sub>3</sub> ] <sup>+</sup>         | 1061.394378 | 1061.39459 | 0.20  |
| [K8Vaso+Na] <sup>+</sup>                          | 1078.420927 | 1078.42129 | 0.34  |
| [b8+alkyne] <sup>+</sup>                          | 1244.453964 | 1244.45515 | 0.95  |
| [b8+alkyne+Na] <sup>+</sup>                       | 1266.435908 | 1266.43596 | 0.04  |
| Absolute average                                  |             |            | 0.13  |
| Standard deviation                                |             |            | 0.22  |

*Figure 8: The fragmentation map of the Lys 8 Vasopressin (K8Vaso) with compound **14** based on the MS/MS spectra.*

Benzyl azide was added in excess (0.2 M) to the sample and the solution was left for one week at room temperature. The MS spectrum (Figure 9) displayed the absence of the peak at 670.73929 and the formation of a peak at 737.27534. This peak confirms the attachment of the peptide to the azide [K8Vaso + **14** + C<sub>7</sub>H<sub>7</sub>N<sub>3</sub> + H + Na]<sup>2+</sup>. This is verified by the comparison of the mathematical simulation with the experimental isotope pattern. The absence of the 670.73929 peak indicates that all of the functionalised peptide reacted with the azide.

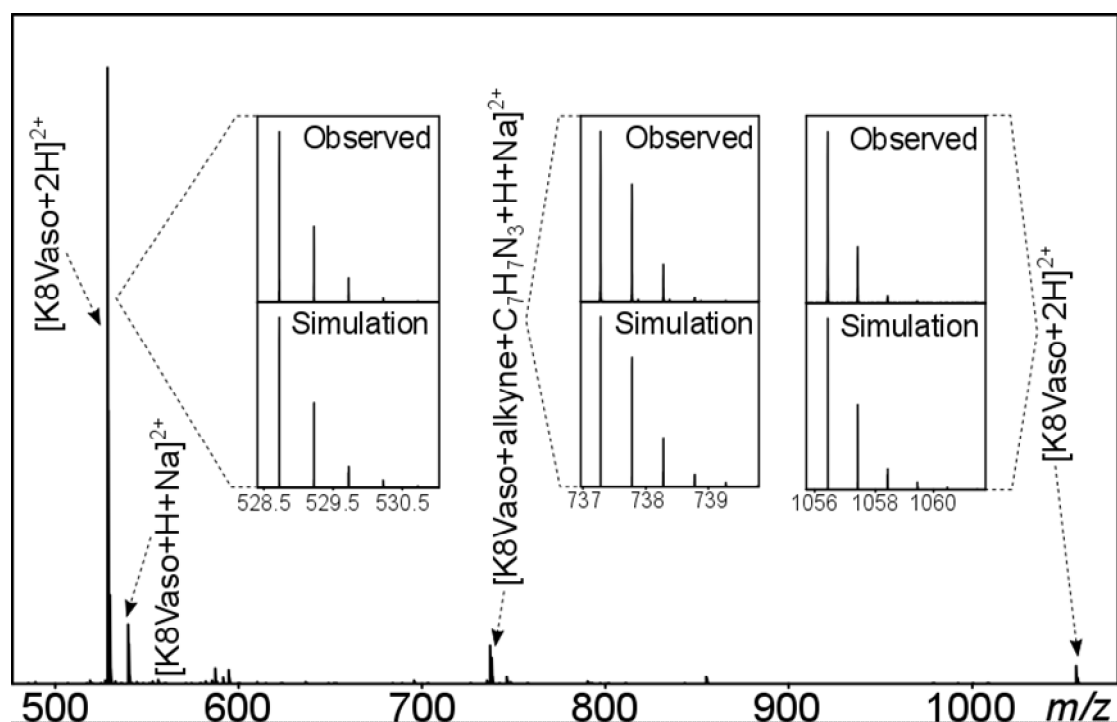

Figure 9: The mass spectrum of the Lys 8 Vasopressin (K8Vaso) with compound **14** ('alkyne') and the benzyl azide ( $C_7H_7N_3$ ). The comparison of the experimental result with the simulation is shown.

The three spectra illustrated in Figure 10. These three spectra are without any addition, with addition of compound **14** and the last with adding both compound **14** and the azide.

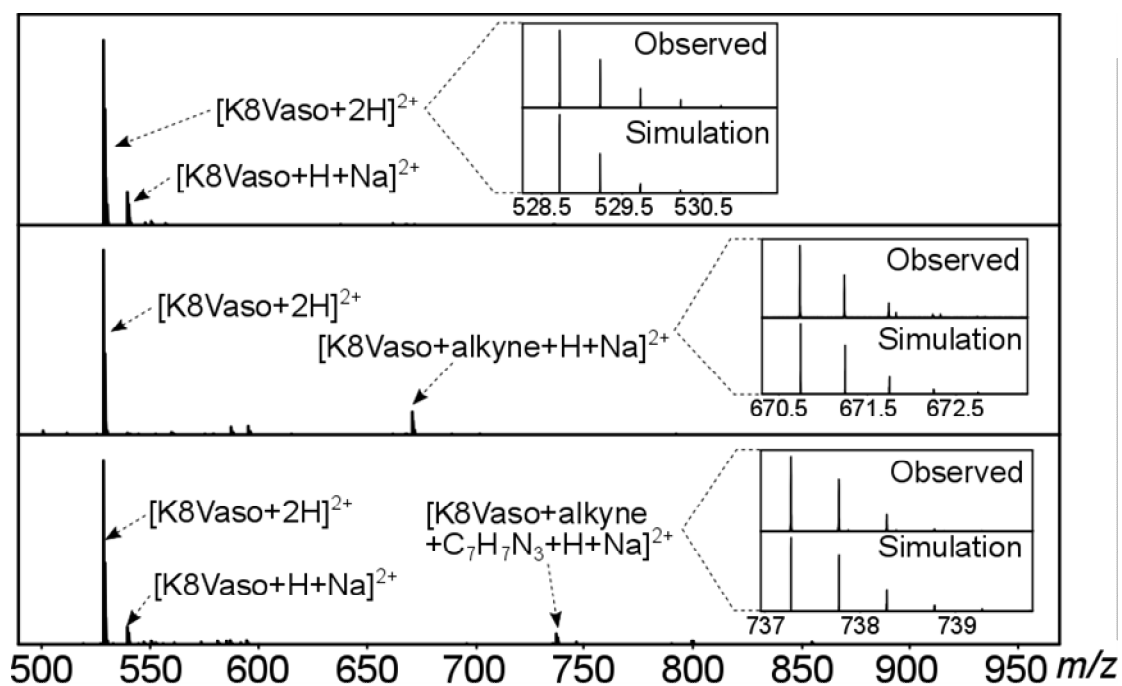

Figure 10: The three mass spectra of Lys 8 Vasopressin (K8Vaso); without compound **14**, with the addition of compound **14** ('alkyne') and with the addition of both compound **14** and the azide ( $C_7H_7N_3$ ).

### Lys 3 Bombesin.

The mass spectra of Lys 3 Bombesin with and without the addition of compound **14** are shown in Figures 11 and 12 respectively. The result was obtained with the 1:3 ratio mixture (Table 1, entry 9) is shown. The comparison showed the appearance of a new peak at the latter MS spectrum. This peak at 938.41993 indicates the peptide bound with the conjugation agent  $[K3BBS + \mathbf{14} + H + Na]^{2+}$ . Furthermore, this was verified by creating a mathematical simulation and comparing it with the experimental isotope pattern.

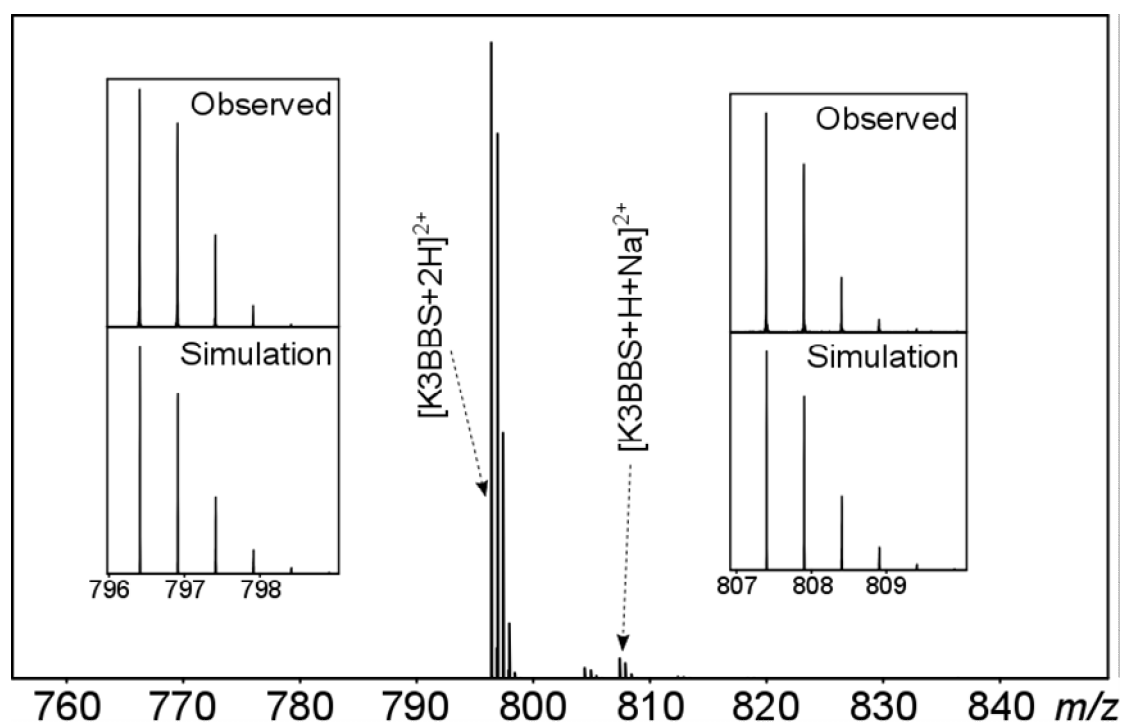

Figure 11: The MS spectra of Lys 3 Bombesin (K3BBS) without adding compound **14**.

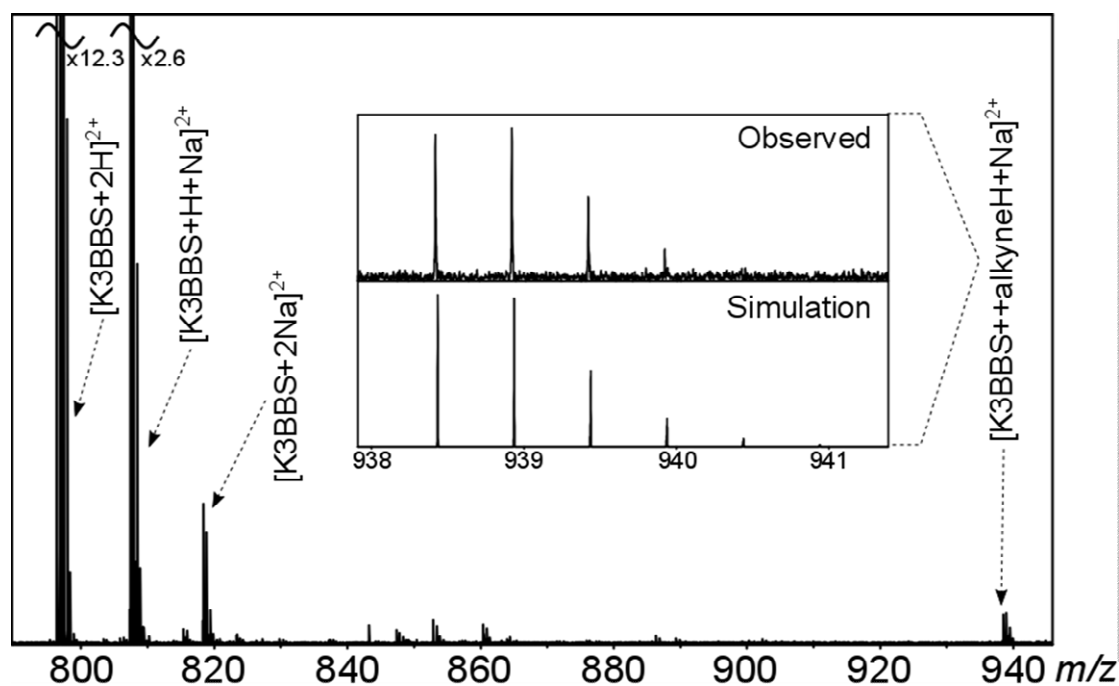

Figure 12: The MS spectra of Lys 3 Bombesin (K3BBS) with compound **14** ('alkyne'). The comparison of the experimental result with the simulation is shown.

After verifying that the conjugation agent was conjugated to the peptide, it was necessary to determine which amino acid is bound the molecule. The MS/MS spectrum revealed a  $b_5$ ,  $b_6$ ,  $b_7$ ,  $b_8$ ,  $b_{10}$  and a  $y_{10}$  ion of the protein attached to the molecule. Based on this outcome, a fragmentation map was created (Figure 13). It can be concluded that the **14** binds to the lysine residue.

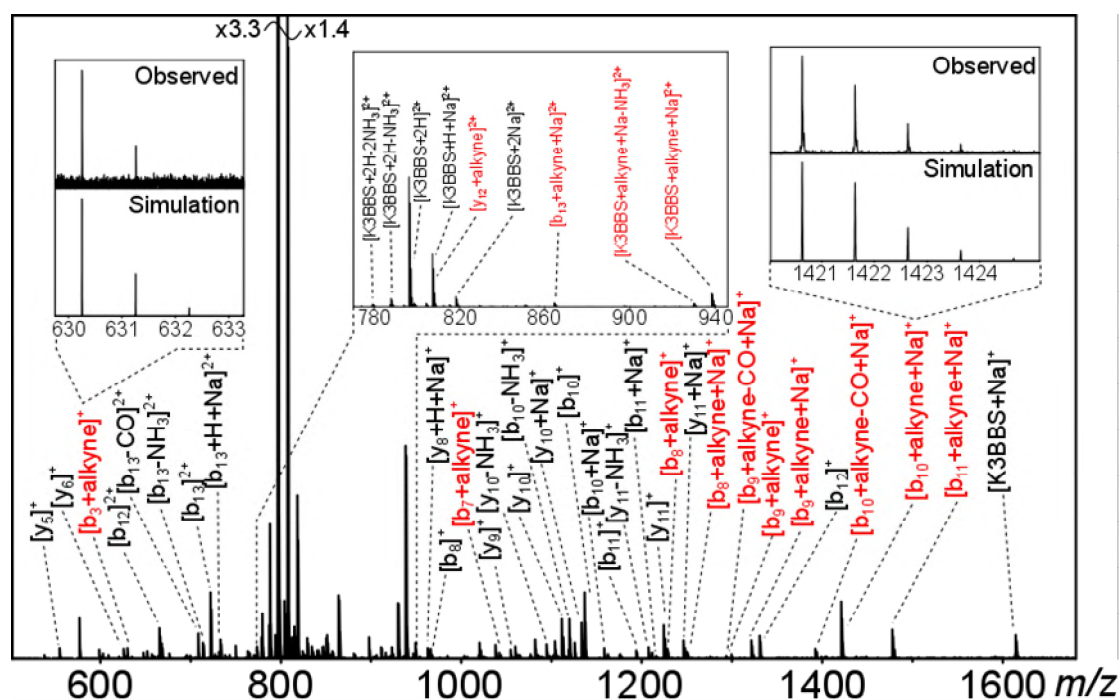

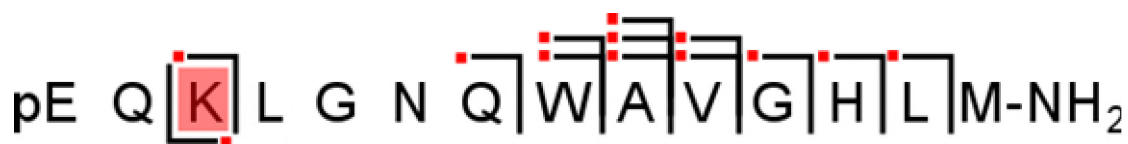

| Assignment                      | Theoretical $m/z$ | Observed $m/z$ | Error/ |
|---------------------------------|-------------------|----------------|--------|
|                                 |                   |                | ppm    |
| $y5^+$                          | 555.307164        | 555.30719      | 0.05   |
| $y6^+$                          | 626.344278        | 626.34414      | -0.22  |
| $[b3+alkyne]^+$                 | 630.25584         | 630.25577      | -0.11  |
| $b12^{2+}$                      | 665.836185        | 665.83621      | 0.04   |
| $[b13-CO]^{2+}$                 | 708.38076         | 708.38106      | 0.42   |
| $[b13-NH_3]^{2+}$               | 713.864943        | 713.86487      | -0.10  |
| $b13^{2+}$                      | 722.378217        | 722.37809      | -0.18  |
| $[b13+H+Na]^{2+}$               | 733.36919         | 733.36936      | 0.23   |
| $[K3BBS+2H-2NH_3]^{2+}$         | 779.385185        | 779.38506      | -0.16  |
| $[K3BBS+2H-NH_3]^{2+}$          | 787.89846         | 787.89816      | -0.38  |
| $[K3BBS+2H]^{2+}$               | 796.411734        | 796.41182      | 0.11   |
| $[K3BBS+H+Na]^{2+}$             | 807.402707        | 807.4026       | -0.13  |
| $y12^{2+}$                      | 807.897928        | 807.89787      | -0.07  |
| $[K3BBS+2Na]^{2+}$              | 818.393679        | 818.3936       | -0.10  |
| $[b13+alkyne+Na]^+$             | 864.400687        | 864.40072      | 0.04   |
| $[K3BBS+alkyne+H+Na-NH_3]^{2+}$ | 929.920929        | 929.92086      | -0.07  |
| $[K3BBS+alkyne+H+Na]^{2+}$      | 938.434204        | 938.43421      | 0.01   |
| $[y8+Na]^{1+}$                  | 962.464113        | 962.46392      | -0.20  |
| $[b8]^{1+}$                     | 966.479191        | 966.47905      | -0.15  |
| $[b7+alkyne]^{1+}$              | 1042.462872       | 1042.46275     | -0.12  |
| $y9^+$                          | 1054.525096       | 1054.52488     | -0.20  |
| $[y10-NH_3]^+$                  | 1094.52001        | 1094.5203      | 0.26   |
| $[y10]^+$                       | 1111.546559       | 1111.54666     | 0.09   |
| $[b10-NH_3]^+$                  | 1119.55817        | 1119.55817     | 0.00   |
| $[y10+Na]^+$                    | 1133.528504       | 1133.52876     | 0.23   |
| $b10^+$                         | 1136.584719       | 1136.58472     | 0.00   |
| $[b10+Na]^+$                    | 1158.566663       | 1158.56637     | -0.25  |

|                           |             |            |       |
|---------------------------|-------------|------------|-------|
| $b11^+$                   | 1193.606182 | 1193.60621 | 0.02  |
| $[y11-NH_3]^+$            | 1207.604074 | 1207.60431 | 0.20  |
| $[b11+Na]^+$              | 1215.588127 | 1215.58733 | -0.66 |
| $y11^+$                   | 1224.630623 | 1224.63057 | -0.04 |
| $[b8+alkyne]^{1+}$        | 1228.542185 | 1228.5423  | 0.09  |
| $[y11+Na]^+$              | 1246.612568 | 1246.61224 | -0.26 |
| $[b8+alkyne+Na]^{1+}$     | 1250.52413  | 1250.52428 | 0.12  |
| $[b9+alkyne-CO+Na]^{1+}$  | 1293.566329 | 1293.56605 | -0.22 |
| $[b9+alkyne]^{1+}$        | 1299.579299 | 1299.57935 | 0.04  |
| $[b9+alkyne+Na]^{1+}$     | 1321.561244 | 1321.5612  | -0.03 |
| $b12^+$                   | 1330.665094 | 1330.66519 | 0.07  |
| $[b10+alkyne-CO+Na]^{1+}$ | 1392.634743 | 1392.63529 | 0.39  |
| $[b10+alkyne+Na]^{1+}$    | 1420.629658 | 1420.62944 | -0.15 |
| $[b11+alkyne+Na]^{1+}$    | 1477.651121 | 1477.65109 | -0.02 |
| $[K3BBS+Na]^{1+}$         | 1613.798137 | 1613.79805 | -0.05 |
| <i>Absolute average</i>   |             |            | 0.15  |
| <i>Standard deviation</i> |             |            | 0.20  |

Figure 13: The fragmentation map of the Lys 3 Bombesin (K3BBS) with compound **14** ('alkyne') based on the MS/MS spectra.

The addition of excess azide was undertaken, following the procedure previously described. The reaction mixture was left for one week at room temperature. MS spectrum (Figure 14) with the addition of the azide was obtained. The absence of the peak at 938.41993 and the formation of a novel peak at 1004.96868 was observed. This peak indicates the attachment of the peptide to compound **14** and to the azide  $[K3BBS + \mathbf{14} + C_7H_7N_3 + H + Na]^{2+}$ . This is supported by the comparison of the mathematical simulation with the experimental isotope pattern.

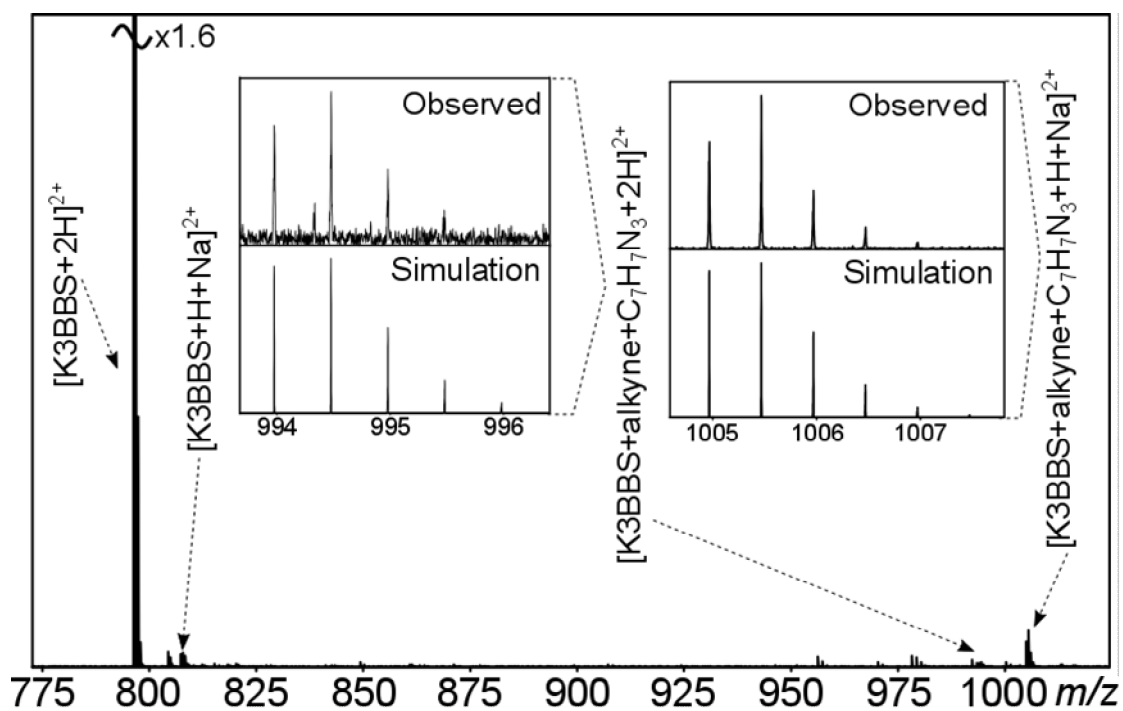

Figure 14: The mass spectrum of the Lys 3 Bombesin (K3BBS) with compound **14** ('alkyne') and the azide ( $C_7H_7N_3$ ). The comparison of the experimental result with the simulation is shown.

All these changes are summarised in Figure 15.



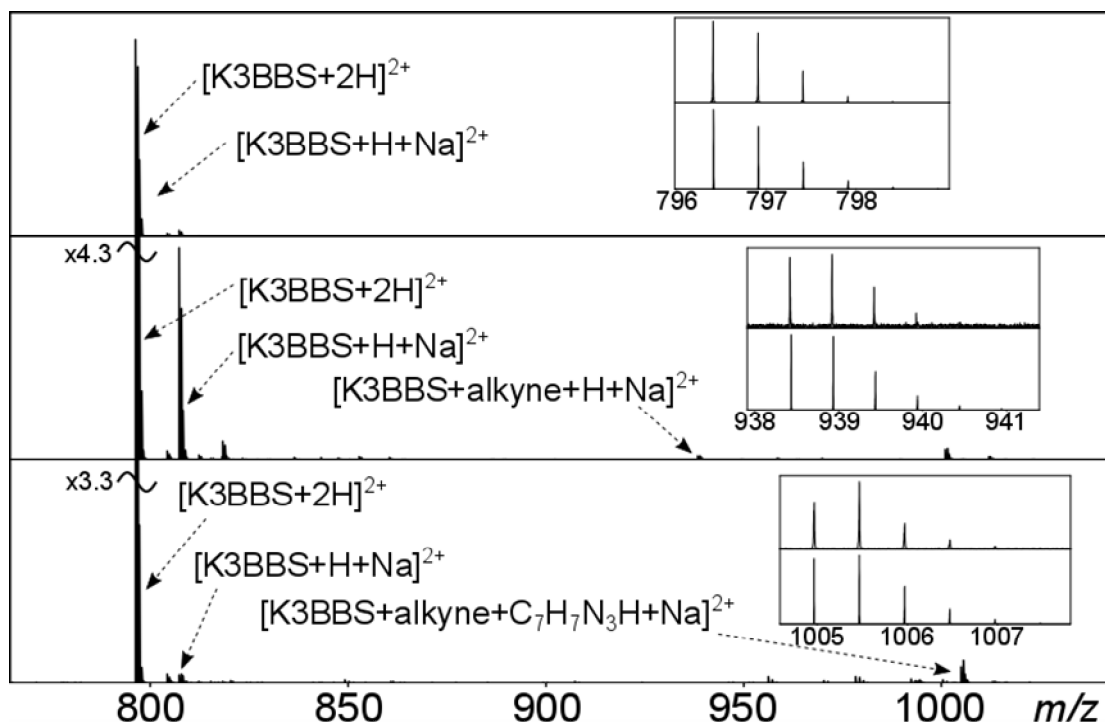

Figure 15: The mass spectra of the Lys 3 Bombesin (K3BBS) with compound **14** ('alkyne') and the azide ( $C_7H_7N_3$ ).

### Myoglobin.

After verifying that compound **14** attached to several peptides, a protein (myoglobin) was tested. The mass spectra of myoglobin with and without the addition of compound **14** are shown in Figures 16 and 17 respectively. The appearance of new peaks at the latter mass spectrum were observed. These peaks correspond to the peptide bound with the conjugation agent in various charge states. This was confirmed using a mathematical simulation and comparing it with the experimental isotope pattern (Figure 18).

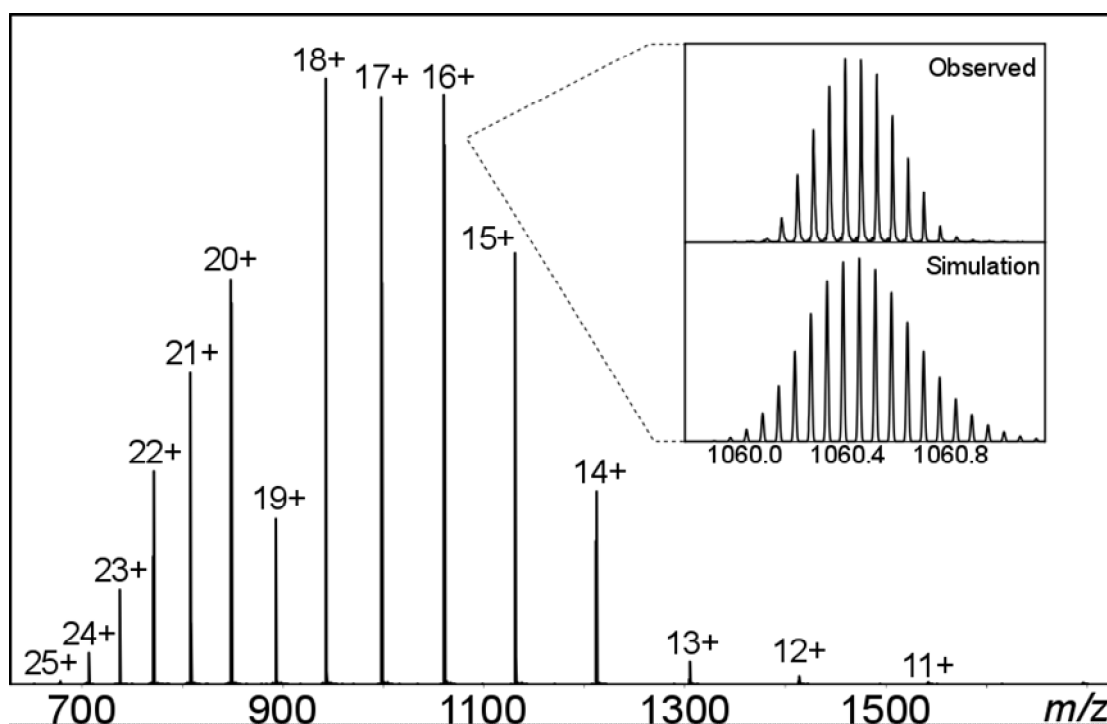

Figure 16: The mass spectrum of Myoglobin without adding compound **14**.

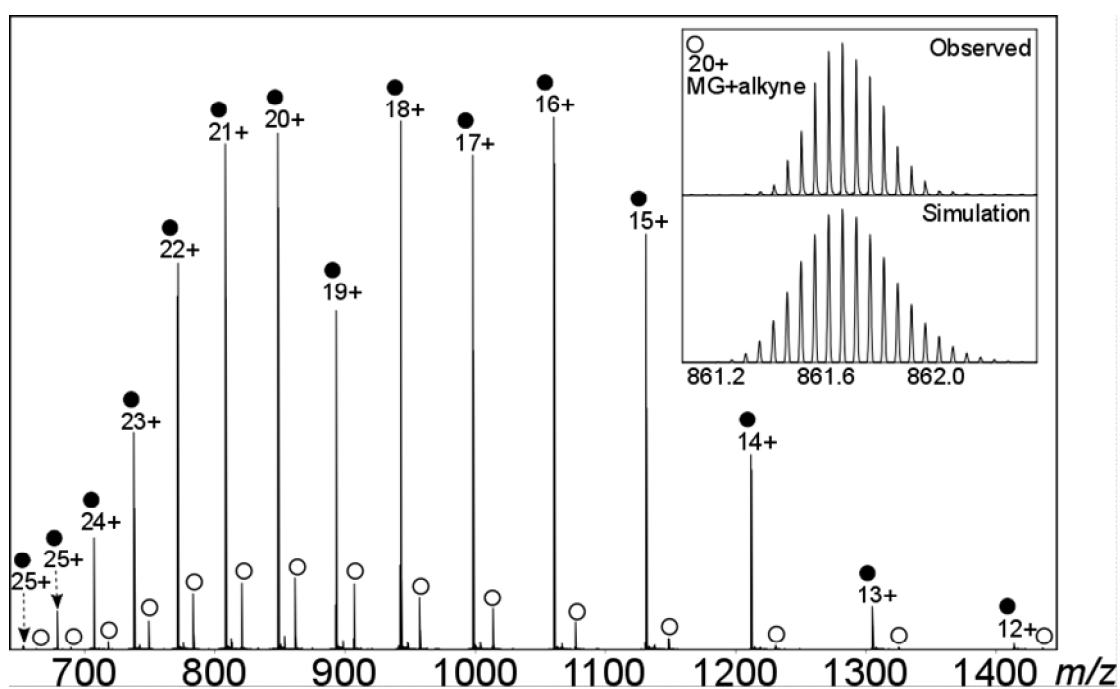

Figure 17: The mass spectrum of Myoglobin following reaction with compound **14** ('alkyne').

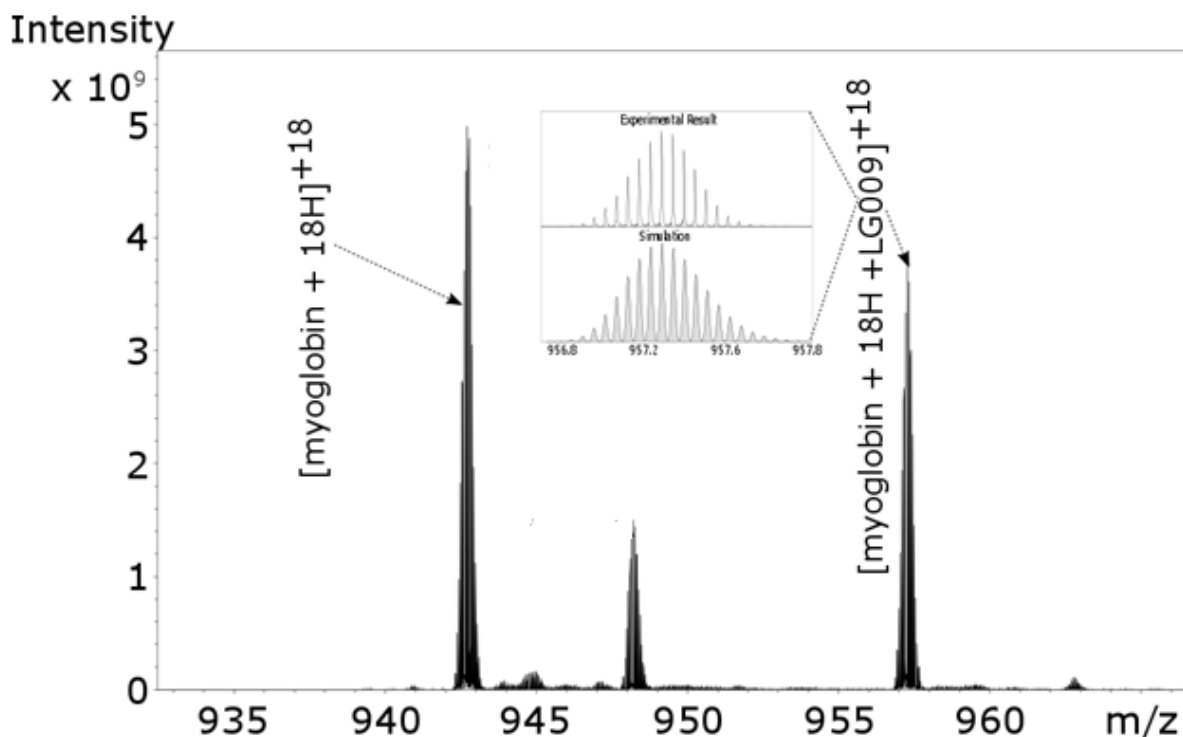

Figure 18: The specified region MS spectra of Myoglobin with compound **14** (identified here as 'LG009'). On the centre, the comparison of the experimental result with the simulation is shown.

Benzyl azide was added in excess and the sample was left for one week at room temperature. The mass spectrum (Figure 19) with the addition of the azide was obtained. The peaks which indicate the binding of **14** with the myoglobin were replaced by novel peaks which indicate the attachment of the myoglobin to compound **14** and to the azide which is confirmed by the comparison of the mathematical simulation with the experimental isotope pattern (Figure 20).

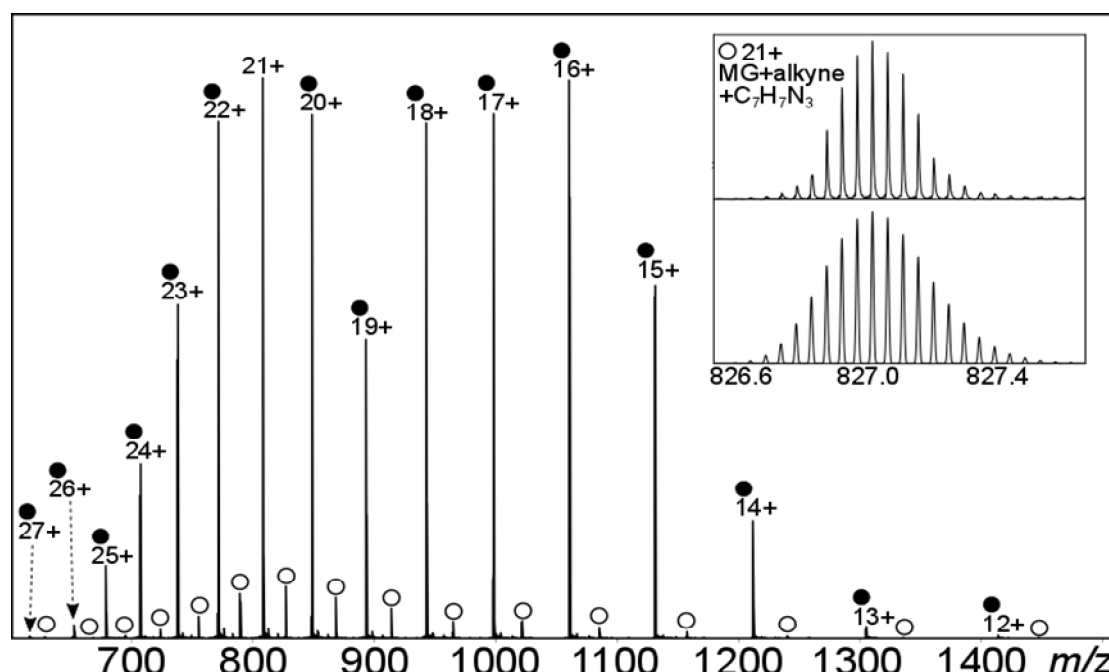

Figure 19: The mass spectrum of Myoglobin with compound **14** and the azide ( $C_7H_7N_3$ ).

All the modifications are summarised in Figure 20, for one charge state of the myoglobin derivatives.

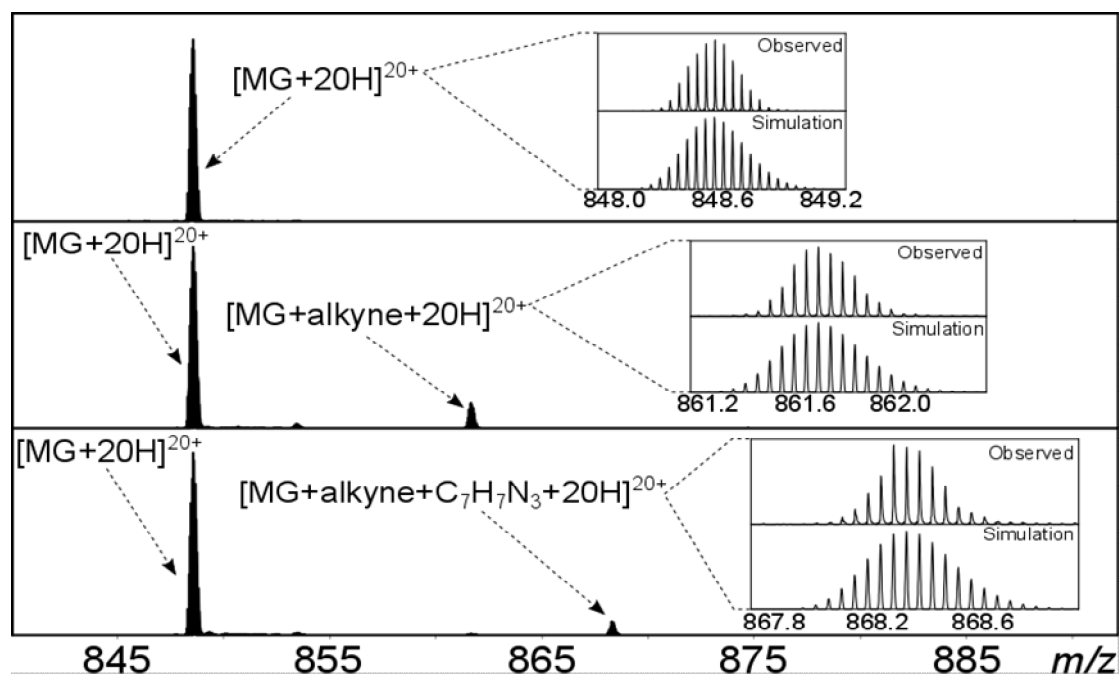

Figure 20: The specified region MS spectra of Myoglobin (MG). The first one is without compound **14**, the second with the addition of compound **14** ('alkyne') and the last with the addition of both compound **14** and the azide ( $C_7H_7N_3$ ).

X-Ray Crystallographic data:**Table 2.** Summary of X-ray crystallographic data.

| <b>Compl<br/>ex</b>                      | <b>BINOL<br/>2</b>                                         | <b>diBr 3</b>                                                     | <b>tetraBr 4</b>                                                 | <b>Acid 13</b>                                             | <b>Ester 11</b>                                            | <b>5a</b>                                                     | <b>(CH<sub>2</sub>)<sub>4</sub><br/>10</b>                 |
|------------------------------------------|------------------------------------------------------------|-------------------------------------------------------------------|------------------------------------------------------------------|------------------------------------------------------------|------------------------------------------------------------|---------------------------------------------------------------|------------------------------------------------------------|
| Formula                                  | C <sub>24</sub> H <sub>16</sub> O <sub>2</sub>             | C <sub>16</sub> H <sub>10</sub> Br <sub>2</sub><br>O <sub>2</sub> | C <sub>16</sub> H <sub>8</sub> Br <sub>4</sub><br>O <sub>2</sub> | C <sub>17</sub> H <sub>12</sub> O <sub>4</sub>             | C <sub>18</sub> H <sub>14</sub> O <sub>4</sub>             | C <sub>23</sub> H <sub>19</sub> N <sub>3</sub> O <sub>2</sub> | C <sub>16</sub> H <sub>16</sub> O <sub>2</sub>             |
| Crystal<br>system                        | Hexagon<br>al                                              | Monoclini<br>c                                                    | Monoclini<br>c                                                   | Monoclin<br>ic                                             | Monoclini<br>c                                             | Orthorhom<br>bic                                              | Orthorhom<br>bic                                           |
| Space<br>group                           | P6 <sub>1</sub>                                            | I2/a                                                              | 2 <sub>1</sub> /n                                                | C2/c                                                       | P2 <sub>1</sub> /c                                         | P2 <sub>1</sub> 2 <sub>1</sub> 2 <sub>1</sub>                 | Pbcn                                                       |
| a/Å                                      | 13.54378<br>(8)                                            | 14.16761(<br>6)                                                   | 7.84858(5<br>)                                                   | 23.6448(<br>5)                                             | 19.9896(4<br>)                                             | 9.54430(1<br>0)                                               | 15.81826(<br>15)                                           |
| b/Å                                      | 13.54378<br>(8)                                            | 7.46338(4<br>)                                                    | 15.11182(<br>7)                                                  | 7.08950(<br>10)                                            | 7.31234(1<br>0)                                            | 19.2006(2)                                                    | 9.23296(1<br>0)                                            |
| c/Å                                      | 48.3660(<br>3)                                             | 28.10737(<br>12)                                                  | 13.51546(<br>9)                                                  | 18.3229(<br>4)                                             | 20.2663(4<br>)                                             | 20.0739(2)                                                    | 8.32936(9)                                                 |
| α/°                                      | 90                                                         | 90                                                                | 90                                                               | 90                                                         | 90                                                         | 90                                                            | 90                                                         |
| β/°                                      | 90                                                         | 103.6158(<br>4)                                                   | 101.0480(<br>6)                                                  | 119.266(<br>2)                                             | 106.1392(<br>19)                                           | 90                                                            | 90                                                         |
| γ/°                                      | 120                                                        | 90                                                                | 90                                                               | 90                                                         | 90                                                         | 90                                                            | 90                                                         |
| Volume/<br>Å <sup>3</sup>                | 7683.33(<br>10)                                            | 2888.50(2<br>)                                                    | 1573.310(<br>16)                                                 | 2679.42(<br>10)                                            | 2845.58(9<br>)                                             | 3678.66(7)                                                    | 1216.50(2)                                                 |
| Z                                        | 18                                                         | 8                                                                 | 4                                                                | 8                                                          | 8                                                          | 8                                                             | 4                                                          |
| F(000)                                   | 3168.0                                                     | 1536.0                                                            | 1040.0                                                           | 1168.0                                                     | 1232.0                                                     | 1552.0                                                        | 512.0                                                      |
| Goodnes<br>s-of-fit<br>on F <sup>2</sup> | 1.041                                                      | 1.083                                                             | 1.173                                                            | 1.054                                                      | 1.131                                                      | 1.012                                                         | 1.109                                                      |
| Final R<br>indexes<br>[I>=2σ<br>(I)]     | R <sub>1</sub> =<br>0.0315,<br>wR <sub>2</sub> =<br>0.0829 | R <sub>1</sub> =<br>0.0304,<br>wR <sub>2</sub> =<br>0.0799        | R <sub>1</sub> =<br>0.0251,<br>wR <sub>2</sub> =<br>0.0636       | R <sub>1</sub> =<br>0.0378,<br>wR <sub>2</sub> =<br>0.1028 | R <sub>1</sub> =<br>0.0672,<br>wR <sub>2</sub> =<br>0.1835 | R <sub>1</sub> =<br>0.0369,<br>wR <sub>2</sub> =<br>0.0911    | R <sub>1</sub> =<br>0.0370,<br>wR <sub>2</sub> =<br>0.1057 |
| Final R<br>indexes<br>[all data]         | R <sub>1</sub> =<br>0.0318,<br>wR <sub>2</sub> =<br>0.0830 | R <sub>1</sub> =<br>0.0306,<br>wR <sub>2</sub> =<br>0.0801        | R <sub>1</sub> =<br>0.0257,<br>wR <sub>2</sub> =<br>0.0640       | R <sub>1</sub> =<br>0.0419,<br>wR <sub>2</sub> =<br>0.1072 | R <sub>1</sub> =<br>0.0699,<br>wR <sub>2</sub> =<br>0.1850 | R <sub>1</sub> =<br>0.0407,<br>wR <sub>2</sub> =<br>0.0939    | R <sub>1</sub> =<br>0.0380,<br>wR <sub>2</sub> =<br>0.1068 |
| Flack<br>paramete<br>r                   | 0.07(5)                                                    | -                                                                 | -                                                                | -                                                          | -                                                          | -                                                             | -                                                          |

**Compound 2 (BINOL-derived, local code adg1) CCDC1515151:**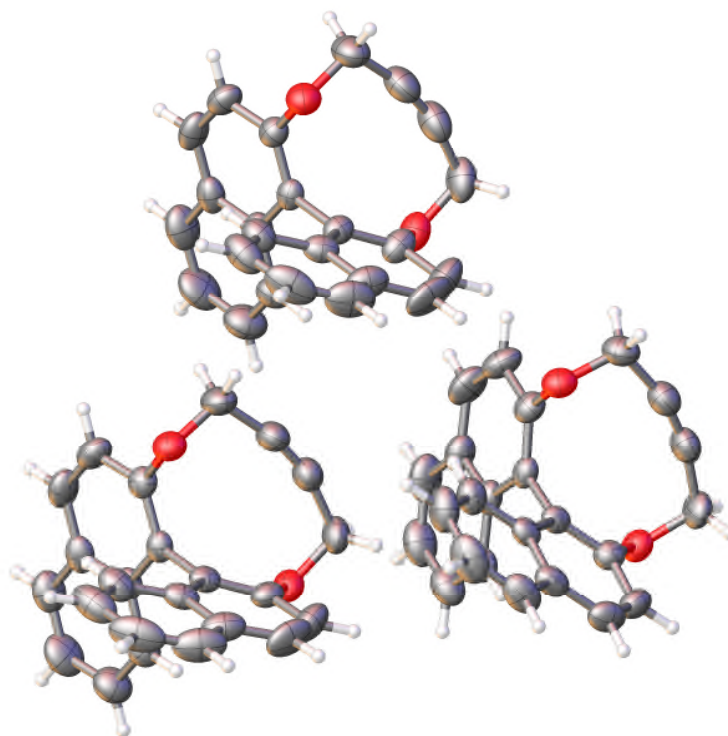

*The three crystallographically independent but chemically equivalent macrocycles in the asymmetric unit of adg1.*

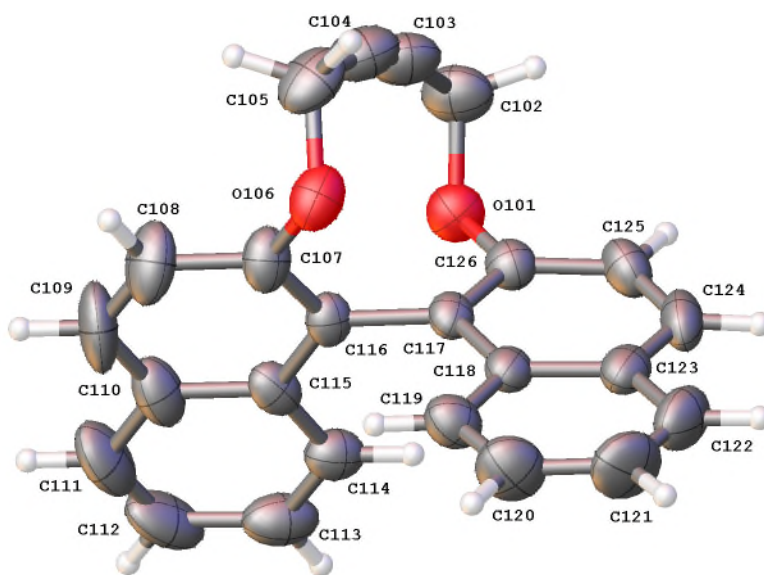

*One of the crystallographically independent macrocycles in the asymmetric unit of adg1 with atom labeling and thermal ellipsoids drawn at 50% probability level.*

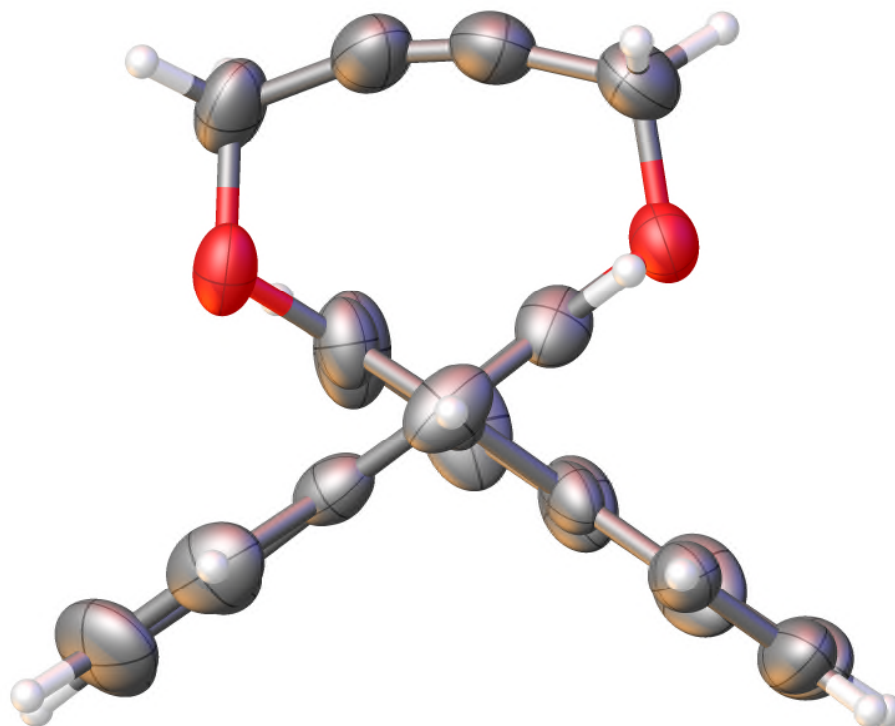

*looking down the naphthyl-naphthyl bond of the macrocycle above showing the bend in the alkyne bridge.*

### **Crystal structure determination of [adg1]**

The asymmetric unit contains three crystallographically independent but chemically identical molecules. There are 18 in the unit cell.

#### Angle between mean planes through the naphthalene groups on each macrocycle

Naphthalene ring C107 C108 C109 C110 C111 C112 C113 C114 C115 C116 to naphthalene ring C117 C118 C119 C120 C121 C122 C123 C124 C125 C126 is 70.633 ( 0.043 ) degrees

Naphthalene ring C207 C208 C209 C210 C211 C212 C213 C214 C215 C216 to naphthalene ring C217 C218 C219 C220 C221 C222 C223 C224 C225 C226 is 78.518 ( 0.041 ) degrees

Naphthalene ring C307 C308 C309 C310 C311 C312 C313 C314 C315 C316 to naphthalene ring C317 C318 C319 C320 C321 C322 C323 C324 C325 C326 is 74.258 ( 0.043 ) degrees

The bridging butyne chain is characterized by a torsion angle between the CH<sub>2</sub>s of each butyne chain and the angle between each CH<sub>2</sub> and the alkyne bond

#### Torsion angles

Torsion angle C102 C103 C104 C105 -10.85 ( 2.44) degrees (the minus charge is just by definition, torsion angle C105 C104 C103 C102 is +10.85)

Torsion angle C202 C203 C204 C205 -21.37 ( 2.14) degrees

Torsion angle C302 C303 C304 C305 -20.50 ( 2.12) degrees

#### Each CH<sub>2</sub> alkyne angle

Angle C102 C103 C104 166.32 ( 0.29) degrees

Angle C103 C104 C105 163.82 ( 0.30) degrees

Angle C202 C203 C204 166.88 ( 0.29) degrees

Angle C203 C204 C205 162.98 ( 0.29) degrees

Angle C302 C303 C304 163.98 ( 0.28) degrees

Angle C303 C304 C305 165.91 ( 0.28) degrees

Hooft y: 0.11(6) Olex2

Flack x: 0.07(5) Shelxl 2014

The Flack parameter is a little high 0.07(5) (should preferably be close to zero with a low esd) but there are no heavy atoms and it is from a known chiral starting material.

All crystals examined were twinned to some extent. The best crystal was measured and the data is presented here.

The crystal is a merohedral twin and the twin component ratio refined to BASF 0.6670(14).

### **Experimental**

Single crystals of C<sub>24</sub>H<sub>16</sub>O<sub>2</sub> [adg1] were grown from slow evaporation of DCM. A suitable crystal was selected and mounted on a glass fibre with Fromblin oil and placed on an Oxford Diffraction diffractometer with a Ruby CCD area detector. The crystal was kept at 150(2) K during data collection. Using Olex2 [1], the structure was solved with the XS [2] structure solution program using Direct Methods and refined with the ShelXL [3] refinement package using Least Squares minimisation.

1 Dolomanov, O.V., Bourhis, L.J., Gildea, R.J., Howard, J.A.K. & Puschmann, H. (2009), J. Appl. Cryst. 42, 339-341.

2 Sheldrick, G.M. (2008). Acta Cryst. A64, 112-122.

3 Sheldrick, G.M. (2008). Acta Cryst. A64, 112-122.

**Crystal Data** for C<sub>24</sub>H<sub>16</sub>O<sub>2</sub> (*M* = 336.37 g/mol): hexagonal, space group P6<sub>1</sub> (no. 169), *a* = 13.54378(8) Å, *c* = 48.3660(3) Å, *V* = 7683.33(10) Å<sup>3</sup>, *Z* = 18, *T* = 150(2) K,



$\mu(\text{CuK}\alpha) = 0.650 \text{ mm}^{-1}$ ,  $D_{\text{calc}} = 1.309 \text{ g/cm}^3$ , 42875 reflections measured ( $7.31^\circ \leq 2\theta \leq 155.924^\circ$ ), 10592 unique ( $R_{\text{int}} = 0.0357$ ,  $R_{\text{sigma}} = 0.0233$ ) which were used in all calculations. The final  $R_1$  was 0.0315 ( $I > 2\sigma(I)$ ) and  $wR_2$  was 0.0830 (all data).

### Crystal data and structure refinement for adg1.

|                                               |                                                                    |
|-----------------------------------------------|--------------------------------------------------------------------|
| Identification code                           | adg1                                                               |
| Empirical formula                             | $\text{C}_{24}\text{H}_{16}\text{O}_2$                             |
| Formula weight                                | 336.37                                                             |
| Temperature/K                                 | 150(2)                                                             |
| Crystal system                                | Hexagonal                                                          |
| Space group                                   | $P6_1$                                                             |
| $a/\text{\AA}$                                | 13.54378(8)                                                        |
| $b/\text{\AA}$                                | 13.54378(8)                                                        |
| $c/\text{\AA}$                                | 48.3660(3)                                                         |
| $\alpha/^\circ$                               | 90                                                                 |
| $\beta/^\circ$                                | 90                                                                 |
| $\gamma/^\circ$                               | 120                                                                |
| Volume/ $\text{\AA}^3$                        | 7683.33(10)                                                        |
| $Z$                                           | 18                                                                 |
| $\rho_{\text{calc}}/\text{g/cm}^3$            | 1.309                                                              |
| $\mu/\text{mm}^{-1}$                          | 0.650                                                              |
| $F(000)$                                      | 3168.0                                                             |
| Crystal size/ $\text{mm}^3$                   | $0.5 \times 0.2 \times 0.14$ colourless block                      |
| Radiation                                     | $\text{CuK}\alpha$ ( $\lambda = 1.54178$ )                         |
| $2\theta$ range for data collection/ $^\circ$ | 7.31 to 155.924                                                    |
| Index ranges                                  | $-17 \leq h \leq 14$ , $-17 \leq k \leq 15$ , $-59 \leq l \leq 60$ |
| Reflections collected                         | 42875                                                              |
| Independent reflections                       | 10592 [ $R_{\text{int}} = 0.0357$ , $R_{\text{sigma}} = 0.0233$ ]  |
| Data/restraints/parameters                    | 10592/1/704                                                        |
| Goodness-of-fit on $F^2$                      | 1.041                                                              |
| Final $R$ indexes [ $I \geq 2\sigma(I)$ ]     | $R_1 = 0.0315$ , $wR_2 = 0.0829$                                   |
| Final $R$ indexes [all data]                  | $R_1 = 0.0318$ , $wR_2 = 0.0830$                                   |
| Largest diff. peak/hole / $\text{e \AA}^{-3}$ | 0.19/-0.21                                                         |

Flack parameter 0.07(5)

**Compound 3 (DiBr, local code adg4) CCDC 1515152:**

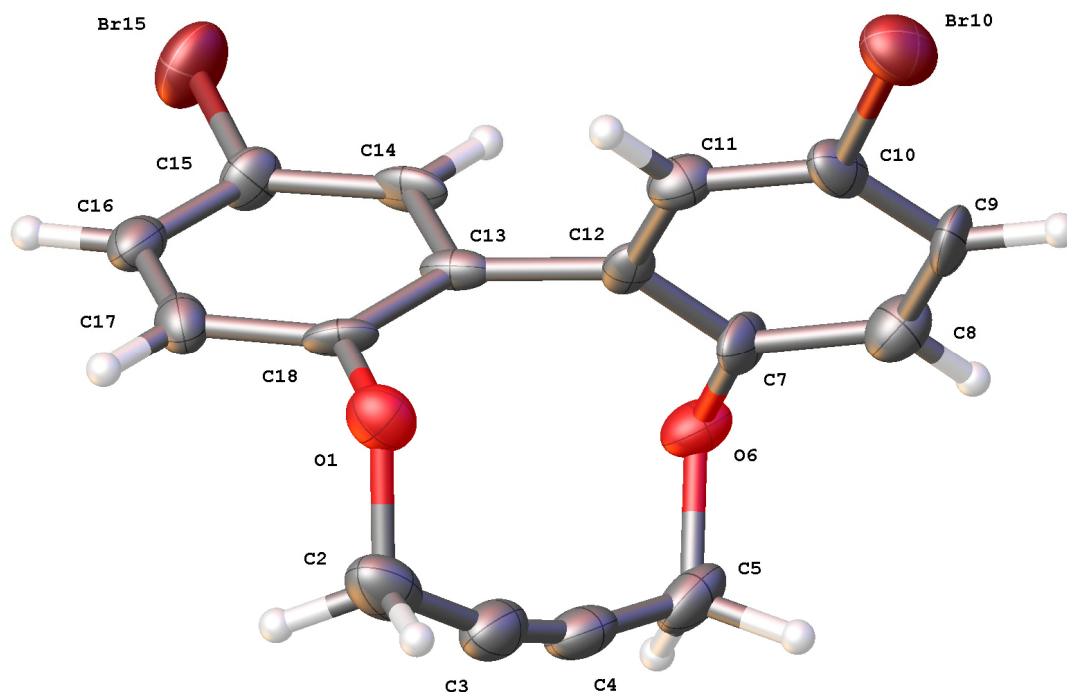

*The solid state structure of the macrocycle in adg4 with atom labeling and thermal ellipsoids drawn at 50% probability level.*

**Crystal structure determination of [adg4]**

The asymmetric unit contains the macrocycle, there are eight in the unit cell.

The angle between mean planes through the two aromatic rings of the biphenyl are C7 C8 C9 C10 C11 C12 to C13 C14 C15 C16 C17 C18 is 67.140 ( 0.065 ) degrees

There is a close contact (halogen bonding anyone) that shows up as a B alert in the cif checker; O1 - Br10\_\$1 3.0467 (0.0015) Angstroms.

Symmetry operator used to generate symmetry equivalent atoms in above contact were \$1 1.5-X,1.5-Y,1.5-Z

**Experimental**

Single crystals of  $C_{16}H_{10}Br_2O_2$  [adg4] were grown from slow evaporation of DCM.. A suitable crystal was selected and mounted on a glass fibre with Fromblin oil and placed on an Xcalibur Gemini diffractometer with a Ruby CCD area detector. The crystal was kept at 150(2) K during data collection. Using Olex2 [1], the structure was solved with the ShelXS [2] structure solution program using Direct Methods and refined with the XL [3] refinement package using Least Squares minimisation.

1. Dolomanov, O.V., Bourhis, L.J., Gildea, R.J, Howard, J.A.K. & Puschmann, H. (2009), J. Appl. Cryst. 42, 339-341.
2. Sheldrick, G.M. (2008). Acta Cryst. A64, 112-122.
3. Sheldrick, G.M. (2008). Acta Cryst. A64, 112-122.

**Crystal Data** for  $C_{16}H_{10}Br_2O_2$  ( $M = 394.06$  g/mol): monoclinic, space group I2/a (no. 15),  $a = 14.16761(6)$  Å,  $b = 7.46338(4)$  Å,  $c = 28.10737(12)$  Å,  $\beta = 103.6158(4)^\circ$ ,  $V = 2888.50(2)$  Å<sup>3</sup>,  $Z = 8$ ,  $T = 150(2)$  K,  $\mu(\text{CuK}\alpha) = 7.105$  mm<sup>-1</sup>,  $D_{\text{calc}} = 1.812$  g/cm<sup>3</sup>, 27581 reflections measured ( $6.472^\circ \leq 2\theta \leq 156.314^\circ$ ), 3075 unique ( $R_{\text{int}} = 0.0448$ ,  $R_{\text{sigma}} = 0.0177$ ) which were used in all calculations. The final  $R_1$  was 0.0304 ( $I > 2\sigma(I)$ ) and  $wR_2$  was 0.0801 (all data).

#### Crystal data and structure refinement for adg4.

|                       |                       |
|-----------------------|-----------------------|
| Identification code   | adg4                  |
| Empirical formula     | $C_{16}H_{10}Br_2O_2$ |
| Formula weight        | 394.06                |
| Temperature/K         | 150(2)                |
| Crystal system        | monoclinic            |
| Space group           | I2/a                  |
| $a/\text{\AA}$        | 14.16761(6)           |
| $b/\text{\AA}$        | 7.46338(4)            |
| $c/\text{\AA}$        | 28.10737(12)          |
| $\alpha/^\circ$       | 90                    |
| $\beta/^\circ$        | 103.6158(4)           |
| $\gamma/^\circ$       | 90                    |
| Volume/Å <sup>3</sup> | 2888.50(2)            |

|                                                       |                                                                  |
|-------------------------------------------------------|------------------------------------------------------------------|
| Z                                                     | 8                                                                |
| $\rho_{\text{calc}}/\text{cm}^3$                      | 1.812                                                            |
| $\mu/\text{mm}^{-1}$                                  | 7.105                                                            |
| F(000)                                                | 1536.0                                                           |
| Crystal size/ $\text{mm}^3$                           | $0.3 \times 0.2 \times 0.1$ colourless block                     |
| Radiation                                             | $\text{CuK}\alpha$ ( $\lambda = 1.54184$ )                       |
| $2\theta$ range for data collection/ $^\circ$         | 6.472 to 156.314                                                 |
| Index ranges                                          | $-17 \leq h \leq 17$ , $-9 \leq k \leq 7$ , $-35 \leq l \leq 35$ |
| Reflections collected                                 | 27581                                                            |
| Independent reflections                               | 3075 [ $R_{\text{int}} = 0.0448$ , $R_{\text{sigma}} = 0.0177$ ] |
| Data/restraints/parameters                            | 3075/0/181                                                       |
| Goodness-of-fit on $F^2$                              | 1.083                                                            |
| Final R indexes [ $I \geq 2\sigma(I)$ ]               | $R_1 = 0.0304$ , $wR_2 = 0.0799$                                 |
| Final R indexes [all data]                            | $R_1 = 0.0306$ , $wR_2 = 0.0801$                                 |
| Largest diff. peak/hole / $\text{e } \text{\AA}^{-3}$ | 0.68/-0.68                                                       |

**Compound 4 (tetraBr, local code adg5) CCDC1515153:**

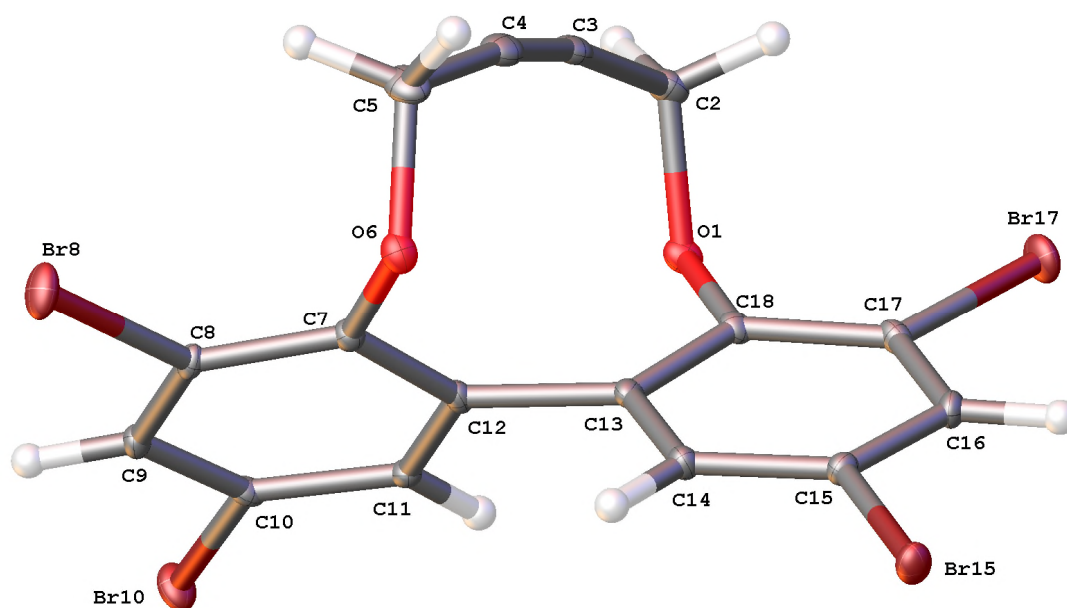

*molecular structure of the tetrabromomacrocycle in adg5 with atom labels and thermal ellipsoids at 50% probability level*

### Crystal structure determination of [adg5]

The asymmetric unit contains the tetrabromomacrocycle, there are 4 in the unit cell.

No problems to report in the refinement.

The angle between mean planes through the two aromatic rings define by the following atoms C7 C8 C9 C10 C11 C12 to was C13 C14 C15 C16 C17 C18 was 57.881 ( 0.066 ) degrees. Closest atomic contact C9 - C11\_\$1 3.4789 (0.0030) Angstroms

Symmetry operator used to generate symmetry related atoms discussed in above contacts was \$1 -X,1-Y,1-Z

### Experimental

Single crystals of  $C_{16}H_8Br_4O_2$  [adg5] were grown from slow evaporation of DCM. A suitable crystal was selected and mounted on a glass fibre with Fromblin oil and placed on an Xcalibur Gemini diffractometer with a Ruby CCD area detector. The crystal was kept at 175(2) K during data collection. Using Olex2 [1], the structure was solved with the ShelXT [2] structure solution program using Direct Methods and refined with the ShelXL [3] refinement package using Least Squares minimisation.

1. Dolomanov, O.V., Bourhis, L.J., Gildea, R.J, Howard, J.A.K. & Puschmann, H. (2009), J. Appl. Cryst. 42, 339-341.
2. Sheldrick, G.M. (2015). Acta Cryst. A71, 3-8.
3. Sheldrick, G.M. (2015). Acta Cryst. C71, 3-8.

**Crystal Data** for  $C_{16}H_8Br_4O_2$  ( $M = 551.86$  g/mol): monoclinic, space group  $P2_1/n$  (no. 14),  $a = 7.84858(5)$  Å,  $b = 15.11182(7)$  Å,  $c = 13.51546(9)$  Å,  $\beta = 101.0480(6)^\circ$ ,  $V = 1573.310(16)$  Å<sup>3</sup>,  $Z = 4$ ,  $T = 175(2)$  K,  $\mu(\text{CuK}\alpha) = 12.522$  mm<sup>-1</sup>,  $D_{\text{calc}} = 2.330$  g/cm<sup>3</sup>, 21338 reflections measured ( $8.87^\circ \leq 2\theta \leq 155.778^\circ$ ), 3343 unique ( $R_{\text{int}} = 0.0383$ ,  $R_{\text{sigma}} = 0.0218$ ) which were used in all calculations. The final  $R_1$  was 0.0251 ( $I > 2\sigma(I)$ ) and  $wR_2$  was 0.0640 (all data).

### Crystal data and structure refinement for adg5.

|                                             |                                                               |
|---------------------------------------------|---------------------------------------------------------------|
| Identification code                         | adg5                                                          |
| Empirical formula                           | C <sub>16</sub> H <sub>8</sub> Br <sub>4</sub> O <sub>2</sub> |
| Formula weight                              | 551.86                                                        |
| Temperature/K                               | 175(2)                                                        |
| Crystal system                              | monoclinic                                                    |
| Space group                                 | P2 <sub>1</sub> /n                                            |
| a/Å                                         | 7.84858(5)                                                    |
| b/Å                                         | 15.11182(7)                                                   |
| c/Å                                         | 13.51546(9)                                                   |
| α/°                                         | 90                                                            |
| β/°                                         | 101.0480(6)                                                   |
| γ/°                                         | 90                                                            |
| Volume/Å <sup>3</sup>                       | 1573.310(16)                                                  |
| Z                                           | 4                                                             |
| ρ <sub>calc</sub> /cm <sup>3</sup>          | 2.330                                                         |
| μ/mm <sup>-1</sup>                          | 12.522                                                        |
| F(000)                                      | 1040.0                                                        |
| Crystal size/mm <sup>3</sup>                | 0.2 × 0.2 × 0.2 colourless block                              |
| Radiation                                   | CuKα (λ = 1.54184)                                            |
| 2Θ range for data collection/°              | 8.87 to 155.778                                               |
| Index ranges                                | -9 ≤ h ≤ 9, -19 ≤ k ≤ 19, -17 ≤ l ≤ 17                        |
| Reflections collected                       | 21338                                                         |
| Independent reflections                     | 3343 [R <sub>int</sub> = 0.0383, R <sub>sigma</sub> = 0.0218] |
| Data/restraints/parameters                  | 3343/0/199                                                    |
| Goodness-of-fit on F <sup>2</sup>           | 1.173                                                         |
| Final R indexes [I ≥ 2σ (I)]                | R <sub>1</sub> = 0.0251, wR <sub>2</sub> = 0.0636             |
| Final R indexes [all data]                  | R <sub>1</sub> = 0.0257, wR <sub>2</sub> = 0.0640             |
| Largest diff. peak/hole / e Å <sup>-3</sup> | 0.45/-0.90                                                    |

**Compound 13 (acid, local code adg9) CCDC 1515154:**

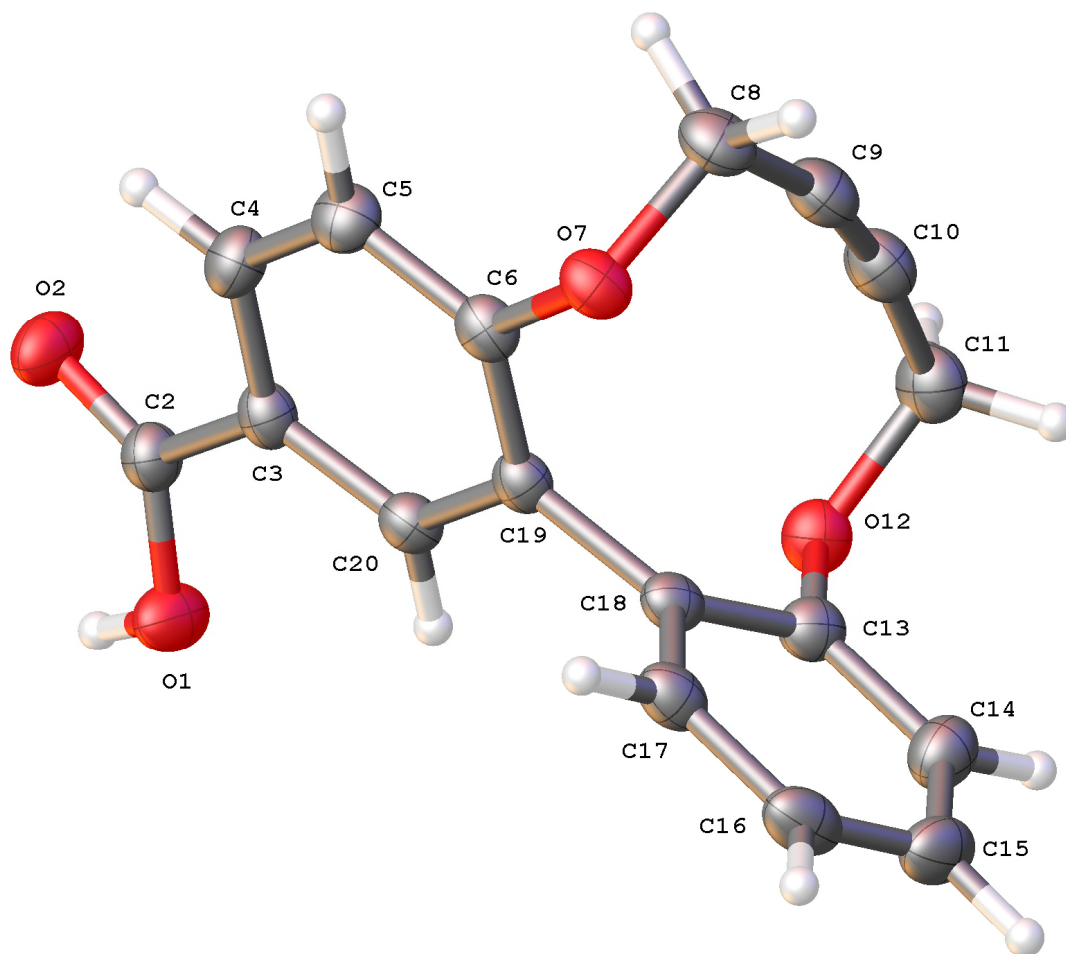

*solid state structure of adg9 with atom labeling and thermal ellipsoids drawn at 50% probability level*

### Crystal structure determination of [local code adg9]

The asymmetric unit contains the alkyne carboxylic acid. There are eight times of these in the unit cell.

The OH of the carboxylic acid was located in a difference map. It was allowed to refine freely but given thermal parameters Uiso 1.5 times the Uequiv of the parent oxygen. It forms the classic carboxylic acid H-bonded dimer with a symmetry related carboxylic acid.

Specified hydrogen bonds (with esds except fixed and riding H)

| D-H     | H...A   | D...A      | $\angle(\text{DHA})$ |                |
|---------|---------|------------|----------------------|----------------|
| 0.89(2) | 1.74(2) | 2.6307(12) | 178(2)               | O1-H1...O2_\$1 |

The atoms used to define mean planes between the two aromatic rings and the angle between these mean planes is

C3 C4 C5 C6 C19 C20 to C13 C14 C15 C16 C17 C18 is 65.968 ( 0.037 ) degrees

## Experimental

Single crystals of  $C_{17}H_{12}O_4$  [adg9] were grown from acetone. A suitable crystal was selected and mounted on a Mitegen head with Fromblin oil and placed on an Xcalibur Gemini diffractometer with a Ruby CCD area detector. The crystal was kept at 150(2) K during data collection. Using Olex2 [1], the structure was solved with the ShelXT [2] structure solution program using Direct Methods and refined with the ShelXL [3] refinement package using Least Squares minimisation.

1. Dolomanov, O.V., Bourhis, L.J., Gildea, R.J, Howard, J.A.K. & Puschmann, H. (2009), J. Appl. Cryst. 42, 339-341.
2. Sheldrick, G.M. (2015). Acta Cryst. A71, 3-8.
3. Sheldrick, G.M. (2015). Acta Cryst. C71, 3-8.

**Crystal Data** for  $C_{17}H_{12}O_4$  ( $M=280.27$  g/mol): monoclinic, space group C2/c (no. 15),  $a = 23.6448(5)$  Å,  $b = 7.08950(10)$  Å,  $c = 18.3229(4)$  Å,  $\beta = 119.266(2)^\circ$ ,  $V = 2679.42(10)$  Å<sup>3</sup>,  $Z = 8$ ,  $T = 150(2)$  K,  $\mu(\text{CuK}\alpha) = 0.822$  mm<sup>-1</sup>,  $D_{\text{calc}} = 1.390$  g/cm<sup>3</sup>, 7620 reflections measured ( $8.574^\circ \leq 2\theta \leq 155.73^\circ$ ), 2804 unique ( $R_{\text{int}} = 0.0245$ ,  $R_{\text{sigma}} = 0.0274$ ) which were used in all calculations. The final  $R_1$  was 0.0378 ( $I > 2\sigma(I)$ ) and  $wR_2$  was 0.1072 (all data).

## Crystal data and structure refinement for adg9.

|                     |                   |
|---------------------|-------------------|
| Identification code | adg9              |
| Empirical formula   | $C_{17}H_{12}O_4$ |
| Formula weight      | 280.27            |
| Temperature/K       | 150(2)            |
| Crystal system      | monoclinic        |
| Space group         | C2/c              |
| $a/\text{\AA}$      | 23.6448(5)        |
| $b/\text{\AA}$      | 7.08950(10)       |
| $c/\text{\AA}$      | 18.3229(4)        |



|                                               |                                                                  |
|-----------------------------------------------|------------------------------------------------------------------|
| $\alpha/^\circ$                               | 90                                                               |
| $\beta/^\circ$                                | 119.266(2)                                                       |
| $\gamma/^\circ$                               | 90                                                               |
| Volume/ $\text{\AA}^3$                        | 2679.42(10)                                                      |
| Z                                             | 8                                                                |
| $\rho_{\text{calc}}/\text{g/cm}^3$            | 1.390                                                            |
| $\mu/\text{mm}^{-1}$                          | 0.822                                                            |
| F(000)                                        | 1168.0                                                           |
| Crystal size/ $\text{mm}^3$                   | $0.2 \times 0.16 \times 0.08$ colourless                         |
| Radiation                                     | $\text{CuK}\alpha$ ( $\lambda = 1.54178$ )                       |
| $2\theta$ range for data collection/ $^\circ$ | 8.574 to 155.73                                                  |
| Index ranges                                  | $-29 \leq h \leq 29$ , $-8 \leq k \leq 8$ , $-23 \leq l \leq 19$ |
| Reflections collected                         | 7620                                                             |
| Independent reflections                       | 2804 [ $R_{\text{int}} = 0.0245$ , $R_{\text{sigma}} = 0.0274$ ] |
| Data/restraints/parameters                    | 2804/0/193                                                       |
| Goodness-of-fit on $F^2$                      | 1.054                                                            |
| Final R indexes [ $I \geq 2\sigma(I)$ ]       | $R_1 = 0.0378$ , $wR_2 = 0.1028$                                 |
| Final R indexes [all data]                    | $R_1 = 0.0419$ , $wR_2 = 0.1072$                                 |
| Largest diff. peak/hole / $e \text{\AA}^{-3}$ | 0.31/-0.19                                                       |

**Compound 11 (Ester, local code mw10) CCDC 1515156:**

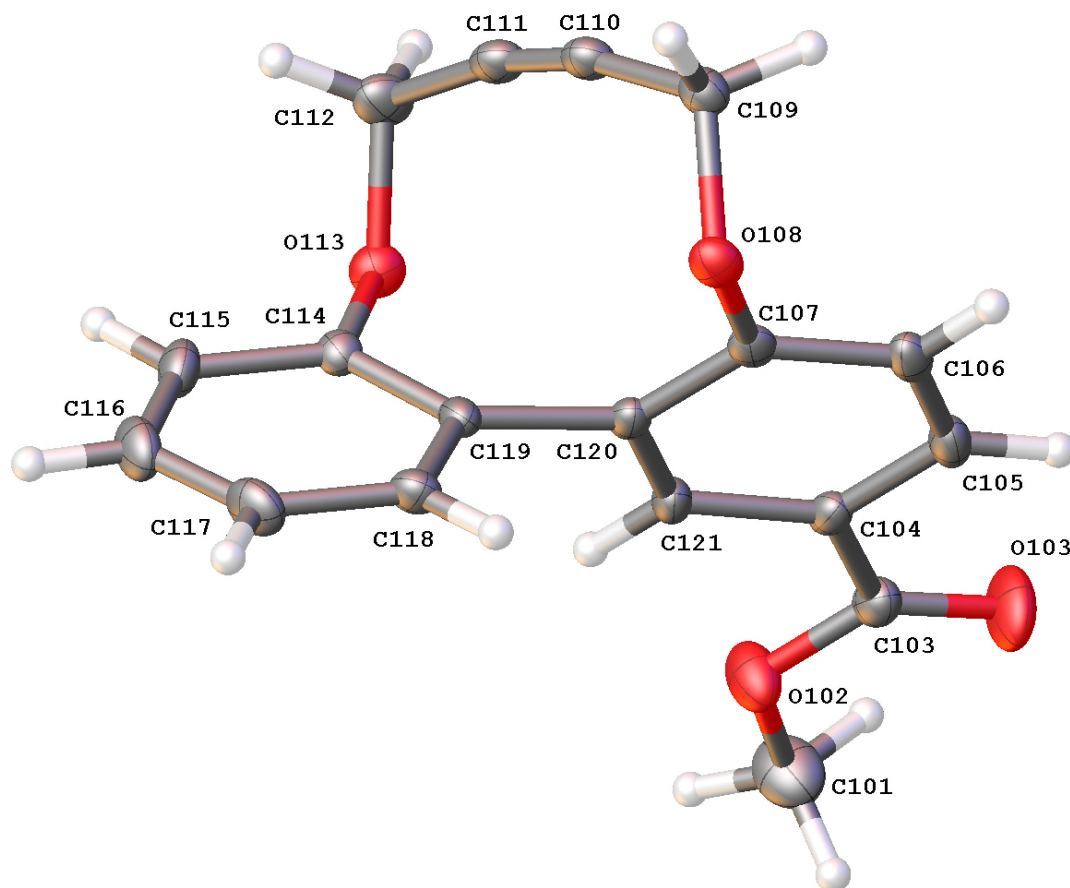

*Solid state structure of one of the crystallographically independent molecules in mw10 with atom labelling and thermal ellipsoids drawn at 50% probability level.*

### Crystal structure determination of [local code mw10]

The asymmetric unit contains two crystallographically independent but chemically identical molecules, eight molecules in the unit cell.

The angle between the phenyl groups is defined by mean planes through the aromatic systems of each ester

Plane C204 C221 C220 C207 C206 C205 to C219 C218 C217 C216 C215 C214 is 63.401 ( 0.089 ) degrees

Plane C104 C121 C120 C107 C106 C105 to plane C119 C118 C117 C116 C115 C114 is 62.773 ( 0.085 ) degrees

The angle between a mean plane through the biphenyl unit and the alkyne handle for each compound is;

Mean plane C104 C106 C120 C114 C116 C118 to a mean plane through the alkyne handle O108 C109 C110 C111 C112 O113 is 88.597 ( 0.125 ) degrees.

Mean plane C204 C206 C220 C214 C216 C218 to a mean plane through the alkyne handle O208 C209 C210 C211 C212 O213 is 88.717 ( 0.115 ) degrees.

## Experimental

Single crystals of C<sub>18</sub>H<sub>14</sub>O<sub>4</sub> [mw10] were grown from slow evaporation of EtOAc. A suitable crystal was selected and mounted on a glass fibre with Fromblin oil and placed on a Rigaku Oxford Diffraction diffractometer with a Dual source (Cu at zero) with an AtlasS2 CCD area detector. The crystal was kept at 150(2) K during data collection. Using Olex2 [1], the structure was solved with the ShelXT [2] structure solution program using Direct Methods and refined with the ShelXL [3] refinement package using Least Squares minimisation.

1. Dolomanov, O.V., Bourhis, L.J., Gildea, R.J, Howard, J.A.K. & Puschmann, H. (2009), J. Appl. Cryst. 42, 339-341.
2. Sheldrick, G.M. (2015). Acta Cryst. A71, 3-8.
3. Sheldrick, G.M. (2015). Acta Cryst. C71, 3-8.

**Crystal Data** for C<sub>18</sub>H<sub>14</sub>O<sub>4</sub> (*M* = 294.29 g/mol): monoclinic, space group P2<sub>1</sub>/c (no. 14), *a* = 19.9896(4) Å, *b* = 7.31234(10) Å, *c* = 20.2663(4) Å,  $\beta$  = 106.1392(19)°, *V* = 2845.58(9) Å<sup>3</sup>, *Z* = 8, *T* = 150(2) K,  $\mu$ (CuK $\alpha$ ) = 0.799 mm<sup>-1</sup>, *D*<sub>calc</sub> = 1.374 g/cm<sup>3</sup>, 51652 reflections measured (8.972° ≤ 2 $\theta$  ≤ 147.348°), 5692 unique (*R*<sub>int</sub> = 0.1165, *R*<sub>sigma</sub> = 0.0414) which were used in all calculations. The final *R*<sub>1</sub> was 0.0672 (*I* > 2 $\sigma$ (*I*)) and *wR*<sub>2</sub> was 0.1850 (all data).

## Crystal data and structure refinement for mw10.

|                     |                                                |
|---------------------|------------------------------------------------|
| Identification code | mw10                                           |
| Empirical formula   | C <sub>18</sub> H <sub>14</sub> O <sub>4</sub> |
| Formula weight      | 294.29                                         |
| Temperature/K       | 150(2)                                         |
| Crystal system      | monoclinic                                     |
| Space group         | P2 <sub>1</sub> /c                             |

|                                               |                                                               |
|-----------------------------------------------|---------------------------------------------------------------|
| $a/\text{\AA}$                                | 19.9896(4)                                                    |
| $b/\text{\AA}$                                | 7.31234(10)                                                   |
| $c/\text{\AA}$                                | 20.2663(4)                                                    |
| $\alpha/^\circ$                               | 90                                                            |
| $\beta/^\circ$                                | 106.1392(19)                                                  |
| $\gamma/^\circ$                               | 90                                                            |
| Volume/ $\text{\AA}^3$                        | 2845.58(9)                                                    |
| Z                                             | 8                                                             |
| $\rho_{\text{calc}}/\text{g cm}^{-3}$         | 1.374                                                         |
| $\mu/\text{mm}^{-1}$                          | 0.799                                                         |
| F(000)                                        | 1232.0                                                        |
| Crystal size/ $\text{mm}^3$                   | $0.2 \times 0.14 \times 0.1$ colourless block                 |
| Radiation                                     | $\text{CuK}\alpha$ ( $\lambda = 1.54184$ )                    |
| $2\theta$ range for data collection/ $^\circ$ | 8.972 to 147.348                                              |
| Index ranges                                  | $-24 \leq h \leq 24, -9 \leq k \leq 9, -24 \leq l \leq 24$    |
| Reflections collected                         | 51652                                                         |
| Independent reflections                       | 5692 [ $R_{\text{int}} = 0.1165, R_{\text{sigma}} = 0.0414$ ] |
| Data/restraints/parameters                    | 5692/0/399                                                    |
| Goodness-of-fit on $F^2$                      | 1.131                                                         |
| Final R indexes [ $I \geq 2\sigma(I)$ ]       | $R_1 = 0.0672, wR_2 = 0.1835$                                 |
| Final R indexes [all data]                    | $R_1 = 0.0699, wR_2 = 0.1850$                                 |
| Largest diff. peak/hole / $e \text{\AA}^{-3}$ | 0.35/-0.37                                                    |

**Compound 5a (Cycloadduct, local code adg) CCDC 1515150:**

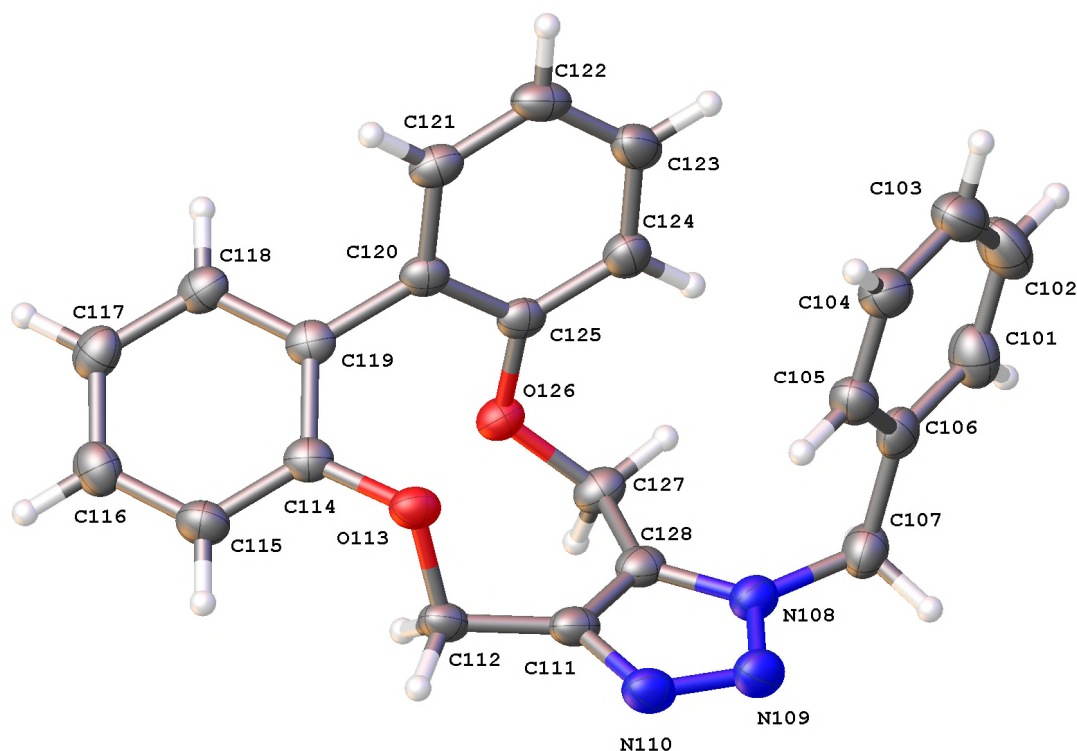

*Solid state structure of one of the crystallographically independent but chemically identical triazines in adg with atom labeling and thermal ellipsoids drawn at 50% probability level*

#### Crystal structure determination of [local code adg]

The asymmetric unit contains two crystallographically independent but chemically identical triazines in the asymmetric unit. Four times this in the unit cell. This was not a chiral synthesis, however the molecules have crystallised in an achiral space group. The correct assignment of the handedness of the crystal chosen is measured by the Flack parameter

Flack x: -0.05(8) Shelx 2014

Hooft y: -0.03(8) Olex2

As this number is relatively small (-0.05(8)) with a error that takes it to zero you can have confidence in the assignment of the handedness of the crystal chosen.

SIMU restraints were used to give the nitrogens and benzylic carbons of one of the triazines (C107 N108 N109 N110 C111 C128) similar thermal parameters to chemically equivalent atoms.

## Experimental

Single crystals of  $C_{23}H_{19}N_3O_2$  [adg] were grown from slow evaporation of DCM. A suitable crystal was selected and mounted on a glass fibre with Fromblin oil and placed on an Xcalibur Gemini diffractometer with a Ruby CCD area detector. The crystal was kept at 150(2) K during data collection. Using Olex2 [1], the structure was solved with the ShelXT [2] structure solution program using Direct Methods and refined with the ShelXL [3] refinement package using Least Squares minimisation.

1. Dolomanov, O.V., Bourhis, L.J., Gildea, R.J., Howard, J.A.K. & Puschmann, H. (2009), J. Appl. Cryst. 42, 339-341.
2. Sheldrick, G.M. (2015). Acta Cryst. A71, 3-8.
3. Sheldrick, G.M. (2015). Acta Cryst. C71, 3-8.

**Crystal Data** for  $C_{23}H_{19}N_3O_2$  ( $M = 369.41$  g/mol): orthorhombic, space group  $P2_12_12_1$  (no. 19),  $a = 9.54430(10)$  Å,  $b = 19.2006(2)$  Å,  $c = 20.0739(2)$  Å,  $V = 3678.66(7)$  Å<sup>3</sup>,  $Z = 8$ ,  $T = 150(2)$  K,  $\mu(\text{CuK}\alpha) = 0.697$  mm<sup>-1</sup>,  $D_{\text{calc}} = 1.334$  g/cm<sup>3</sup>, 22984 reflections measured ( $8.81^\circ \leq 2\theta \leq 156.046^\circ$ ), 7685 unique ( $R_{\text{int}} = 0.0306$ ,  $R_{\text{sigma}} = 0.0298$ ) which were used in all calculations. The final  $R_1$  was 0.0369 ( $I > 2\sigma(I)$ ) and  $wR_2$  was 0.0939 (all data).

## Crystal data and structure refinement for adg.

|                     |                      |
|---------------------|----------------------|
| Identification code | adg                  |
| Empirical formula   | $C_{23}H_{19}N_3O_2$ |
| Formula weight      | 369.41               |
| Temperature/K       | 150(2)               |
| Crystal system      | orthorhombic         |
| Space group         | $P2_12_12_1$         |
| $a/\text{\AA}$      | 9.54430(10)          |
| $b/\text{\AA}$      | 19.2006(2)           |
| $c/\text{\AA}$      | 20.0739(2)           |
| $\alpha/^\circ$     | 90                   |
| $\beta/^\circ$      | 90                   |
| $\gamma/^\circ$     | 90                   |

|                                             |                                                                |
|---------------------------------------------|----------------------------------------------------------------|
| Volume/Å <sup>3</sup>                       | 3678.66(7)                                                     |
| Z                                           | 8                                                              |
| $\rho_{\text{calc}}/\text{cm}^3$            | 1.334                                                          |
| $\mu/\text{mm}^{-1}$                        | 0.697                                                          |
| F(000)                                      | 1552.0                                                         |
| Crystal size/mm <sup>3</sup>                | 0.3 × 0.1 × 0.1 colorless                                      |
| Radiation                                   | CuK $\alpha$ ( $\lambda$ = 1.54184)                            |
| 2 $\Theta$ range for data collection/°      | 8.81 to 156.046                                                |
| Index ranges                                | -8 ≤ h ≤ 11, -21 ≤ k ≤ 24, -25 ≤ l ≤ 25                        |
| Reflections collected                       | 22984                                                          |
| Independent reflections                     | 7685 [ $R_{\text{int}}$ = 0.0306, $R_{\text{sigma}}$ = 0.0298] |
| Data/restraints/parameters                  | 7685/54/505                                                    |
| Goodness-of-fit on $F^2$                    | 1.012                                                          |
| Final R indexes [ $I \geq 2\sigma(I)$ ]     | $R_1$ = 0.0369, $wR_2$ = 0.0911                                |
| Final R indexes [all data]                  | $R_1$ = 0.0407, $wR_2$ = 0.0939                                |
| Largest diff. peak/hole / e Å <sup>-3</sup> | 0.27/-0.29                                                     |
| Flack parameter                             | -0.05(8)                                                       |

**Compound 10 ((CH<sub>2</sub>)<sub>4</sub>, (local code MW9) CCDC 1515155.**

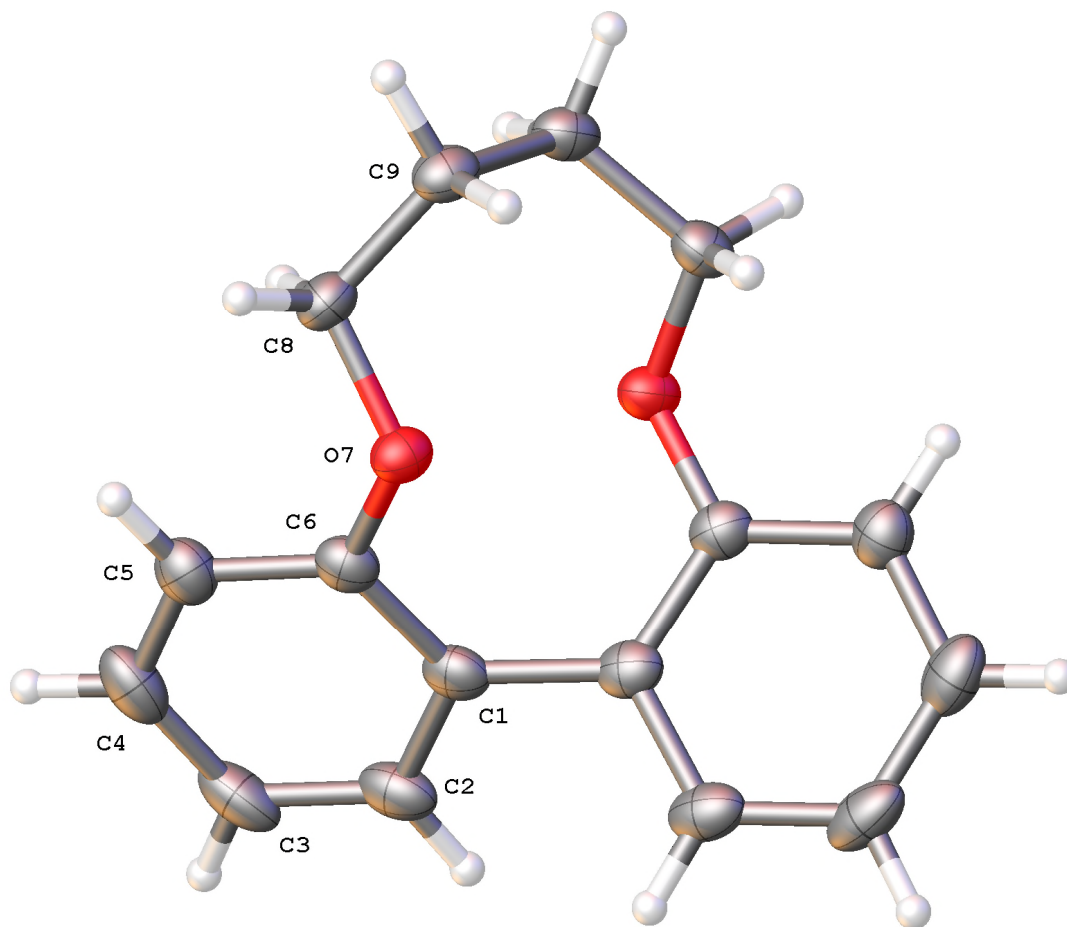

*solid state structure of mw9 with only the asymmetric unit labelled and thermal ellipsoids drawn at 50% probability level*

### Crystal structure determination of [local code mw9]

The asymmetric unit contains half the macrocycle which lies on a two fold axis. Four macrocycles in the unit cell (two R and two S, related by inversion centres).

The angle between mean planes through ring C1 C2 C3 C4 C5 C6 and symmetry related ring C1\_\$1 C2\_\$1 C3\_\$1 C4\_\$1 C5\_\$1 C6\_\$1 is 47.844 ( 0.033 ) degrees.

Distance between oxygens O7 - O7\_\$1 in the macrocycle is 2.6562 (0.0015) Angstroms. There is a stack of macrocycles that alter S to R traveling along the 'c' axis of the cell and are connected by short C-H... O contacts and C-H- pi contacts.

Short contact tabulated below

Specified hydrogen bonds (with esds except fixed and riding H)

|     |       |       |        |
|-----|-------|-------|--------|
| D-H | H...A | D...A | <(DHA) |
|-----|-------|-------|--------|



0.99      2.59      3.5572(14)   166.0      C9-H9A...O7\_\$2

CH- $\pi$  contact between both C-Hs of C9 and the benzene ring

C-H  $\pi$  bond C9-H9B to centroid of C1 C2 C3 C4 C5 C6

H9B to Centroid   distance: 3.17375(4) Å (Olex2)

C-H  $\pi$  bond C9-H9A to centroid of C1 C2 C3 C4 C5 C6

H9A to Centroid   distance: 3.23698(4) Å (Olex2)

(Olex2 generates an esd on this measurement by just using the cell e.s.d as a matrix for the calculation and not by refinement)

Symmetry operators used to define symmetry related atoms in above discussions were

\$1 1-X,+Y,0.5-Z

\$2 1-X,1-Y,-Z

## Experimental

Single crystals of C<sub>16</sub>H<sub>16</sub>O<sub>2</sub> [mw9] were grown from DCM/hexane. A suitable crystal was selected and mounted on a Mitegen head and placed on an Xcalibur Gemini diffractometer with aRuby CCD area detector. The crystal was kept at 150(2) K during data collection. Using Olex2 [1], the structure was solved with the ShelXT [2] structure solution program using Direct Methods and refined with the ShelXL [3] refinement package using Least Squares minimisation.

1. Dolomanov, O.V., Bourhis, L.J., Gildea, R.J, Howard, J.A.K. & Puschmann, H. (2009), J. Appl. Cryst. 42, 339-341.
2. Sheldrick, G.M. (2015). Acta Cryst. A71, 3-8.
3. Sheldrick, G.M. (2015). Acta Cryst. C71, 3-8.

**Crystal Data** for C<sub>16</sub>H<sub>16</sub>O<sub>2</sub> (*M* = 240.29 g/mol): orthorhombic, space group Pbcn (no. 60), *a* = 15.81826(15) Å, *b* = 9.23296(10) Å, *c* = 8.32936(9) Å, *V* = 1216.50(2) Å<sup>3</sup>, *Z* = 4, *T* = 150(2) K,  $\mu(\text{CuK}\alpha)$  = 0.676 mm<sup>-1</sup>, *D*<sub>calc</sub> = 1.312 g/cm<sup>3</sup>, 9414 reflections measured (11.096° ≤ 2 $\Theta$  ≤ 156.52°), 1299 unique (*R*<sub>int</sub> = 0.0305, *R*<sub>sigma</sub> = 0.0147) which were used in all calculations. The final *R*<sub>1</sub> was 0.0370 (*I* > 2 $\sigma$ (*I*)) and *wR*<sub>2</sub> was 0.1068 (all data).

**Crystal data and structure refinement for mw9.**

|                                                |                                                               |
|------------------------------------------------|---------------------------------------------------------------|
| Identification code                            | mw9                                                           |
| Empirical formula                              | C <sub>16</sub> H <sub>16</sub> O <sub>2</sub>                |
| Formula weight                                 | 240.29                                                        |
| Temperature/K                                  | 150(2)                                                        |
| Crystal system                                 | orthorhombic                                                  |
| Space group                                    | Pbcn                                                          |
| a/Å                                            | 15.81826(15)                                                  |
| b/Å                                            | 9.23296(10)                                                   |
| c/Å                                            | 8.32936(9)                                                    |
| $\alpha/^\circ$                                | 90                                                            |
| $\beta/^\circ$                                 | 90                                                            |
| $\gamma/^\circ$                                | 90                                                            |
| Volume/Å <sup>3</sup>                          | 1216.50(2)                                                    |
| Z                                              | 4                                                             |
| $\rho_{\text{calc}}/\text{cm}^3$               | 1.312                                                         |
| $\mu/\text{mm}^{-1}$                           | 0.676                                                         |
| F(000)                                         | 512.0                                                         |
| Crystal size/mm <sup>3</sup>                   | 0.6 × 0.4 × 0.2 colourless block                              |
| Radiation                                      | CuK $\alpha$ ( $\lambda$ = 1.54184)                           |
| 2 $\Theta$ range for data collection/ $^\circ$ | 11.096 to 156.52                                              |
| Index ranges                                   | -19 ≤ h ≤ 19, -10 ≤ k ≤ 11, -9 ≤ l ≤ 10                       |
| Reflections collected                          | 9414                                                          |
| Independent reflections                        | 1299 [R <sub>int</sub> = 0.0305, R <sub>sigma</sub> = 0.0147] |
| Data/restraints/parameters                     | 1299/0/83                                                     |
| Goodness-of-fit on F <sup>2</sup>              | 1.109                                                         |
| Final R indexes [I ≥ 2 $\sigma$ (I)]           | R <sub>1</sub> = 0.0370, wR <sub>2</sub> = 0.1057             |
| Final R indexes [all data]                     | R <sub>1</sub> = 0.0380, wR <sub>2</sub> = 0.1068             |
| Largest diff. peak/hole / e Å <sup>-3</sup>    | 0.24/-0.20                                                    |

**Graphs of Kinetic Data:** *General procedure:* A solution of strained alkyne, azide (1:1) ratio and anisole as internal standard, in the solvent indicated, were held at the indicated temperature in a J. Young's NMR tube. The initial concentrations in each case are given in Table 1 of the main paper. At the time intervals indicated on the graph, NMR spectra were recorded. The second order rate constants were calculated by plotting  $1/[\text{alkyne}]$  against time.

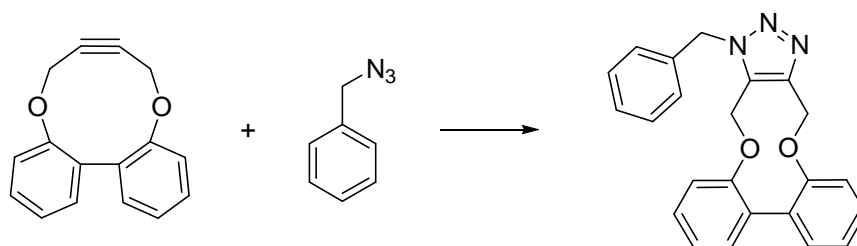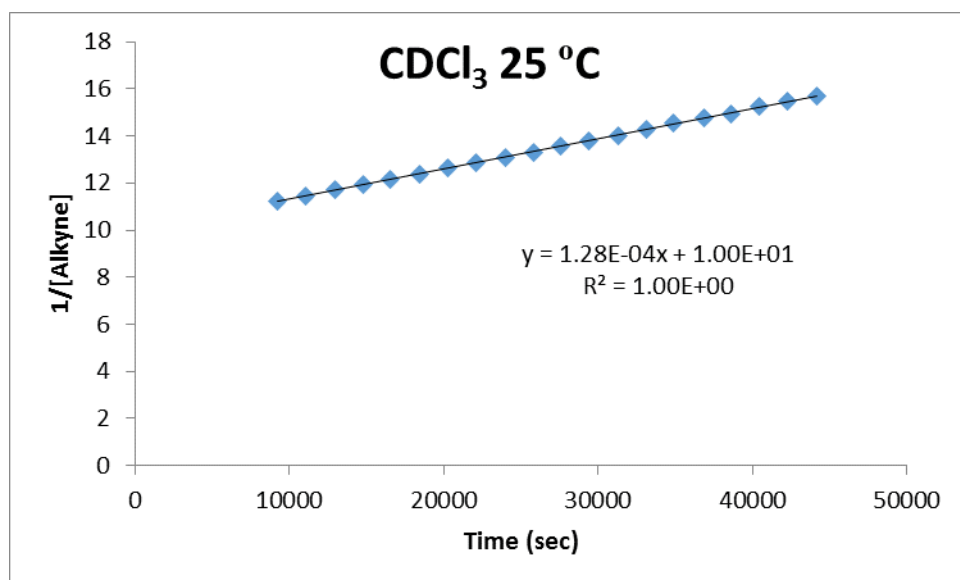

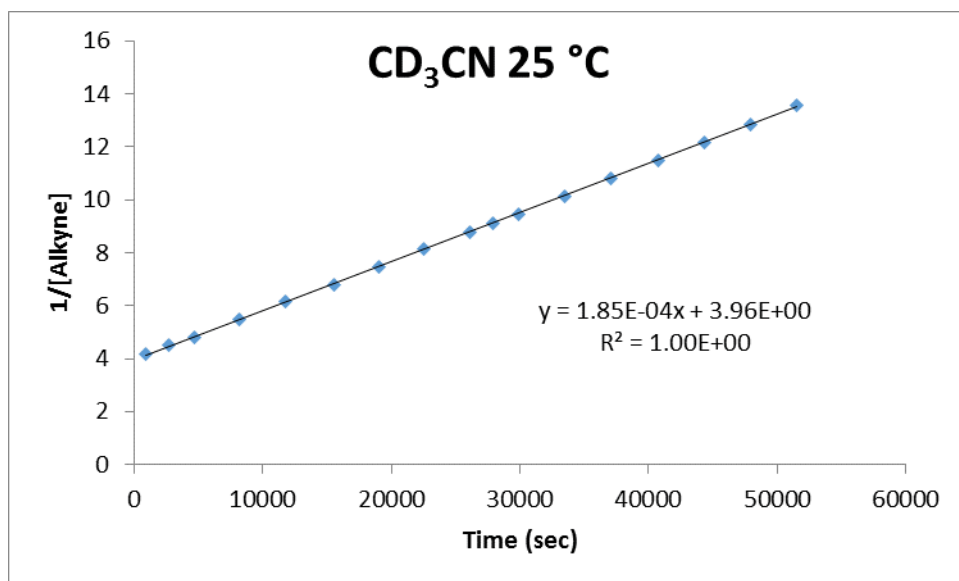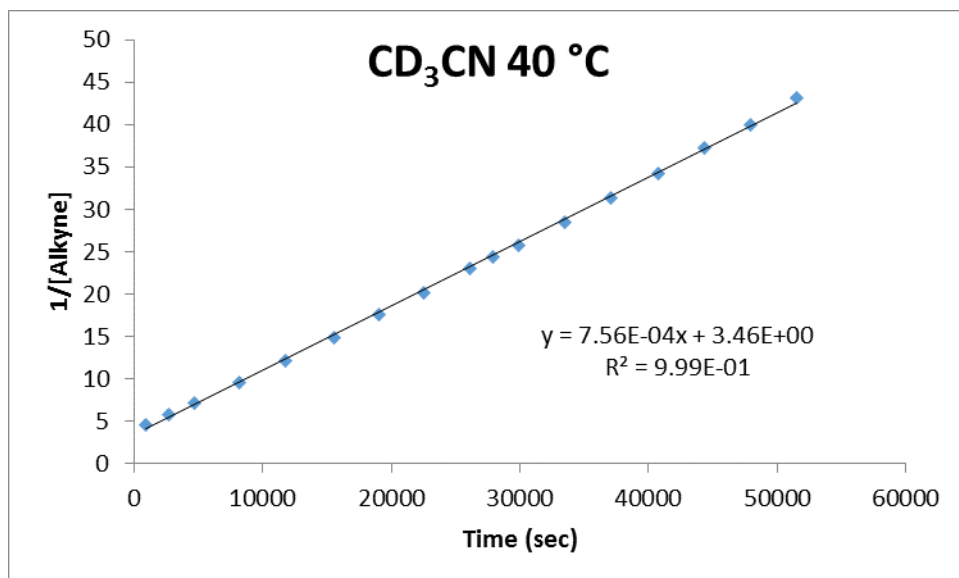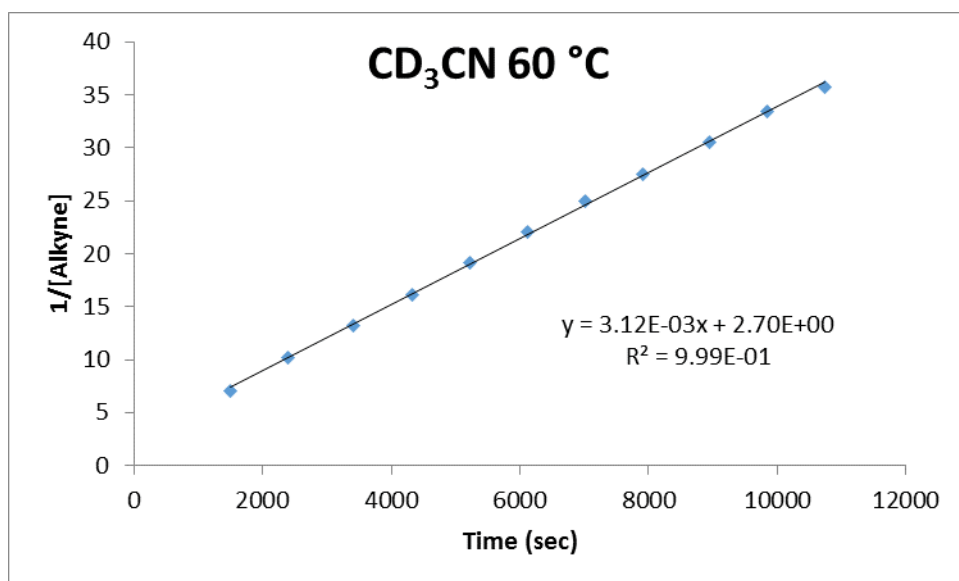

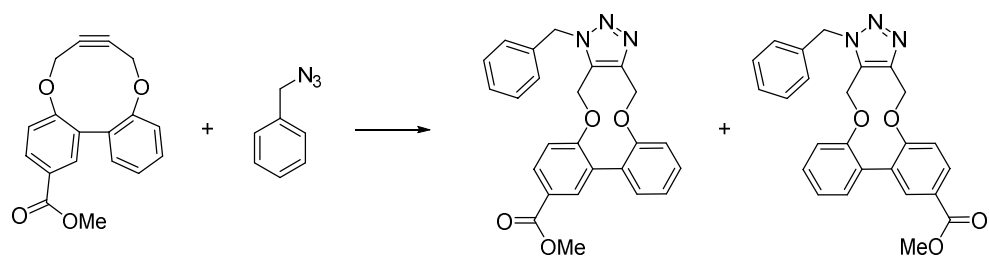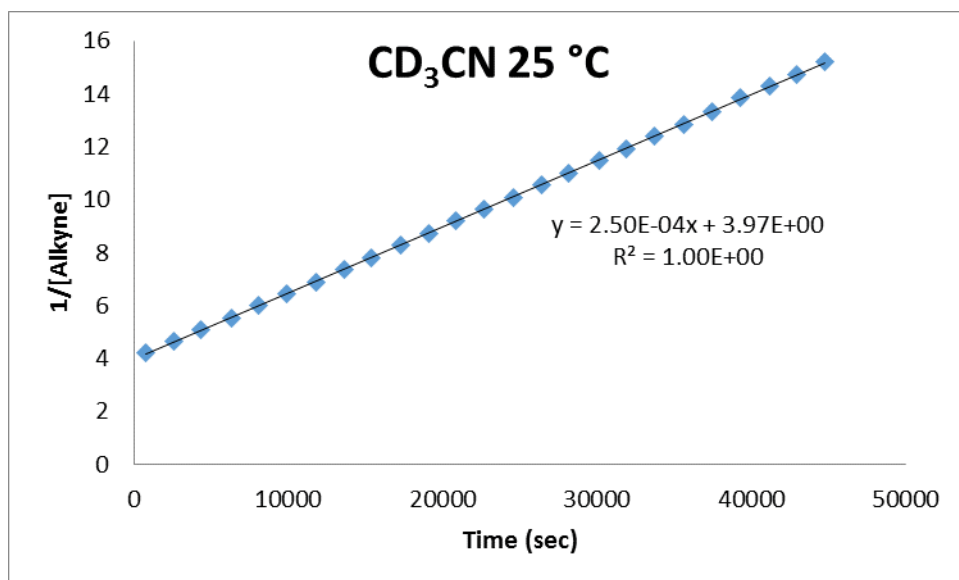

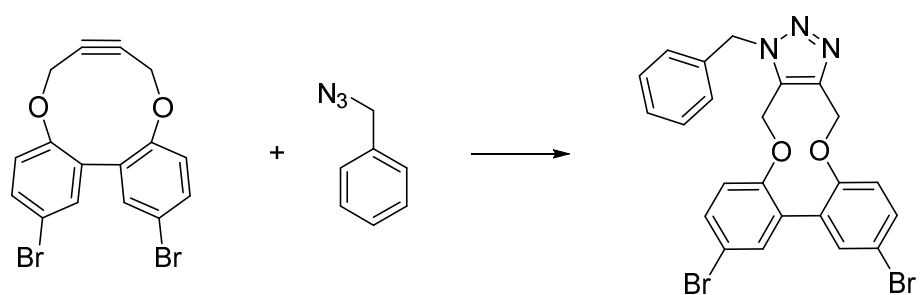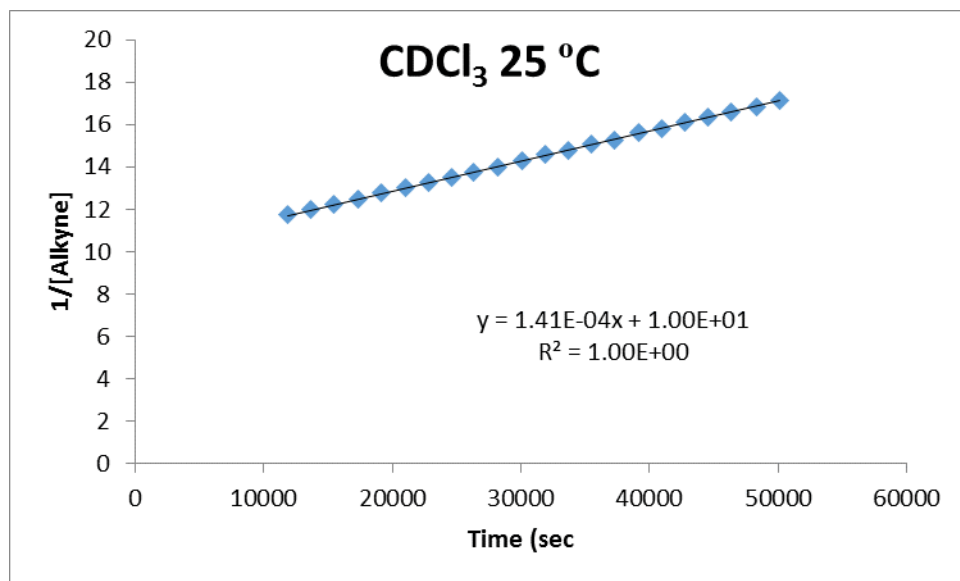

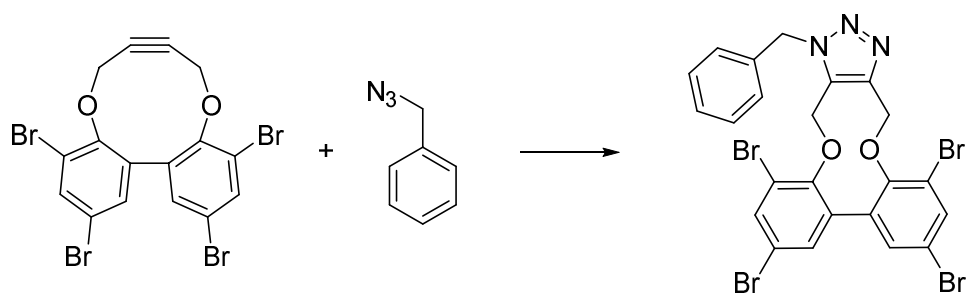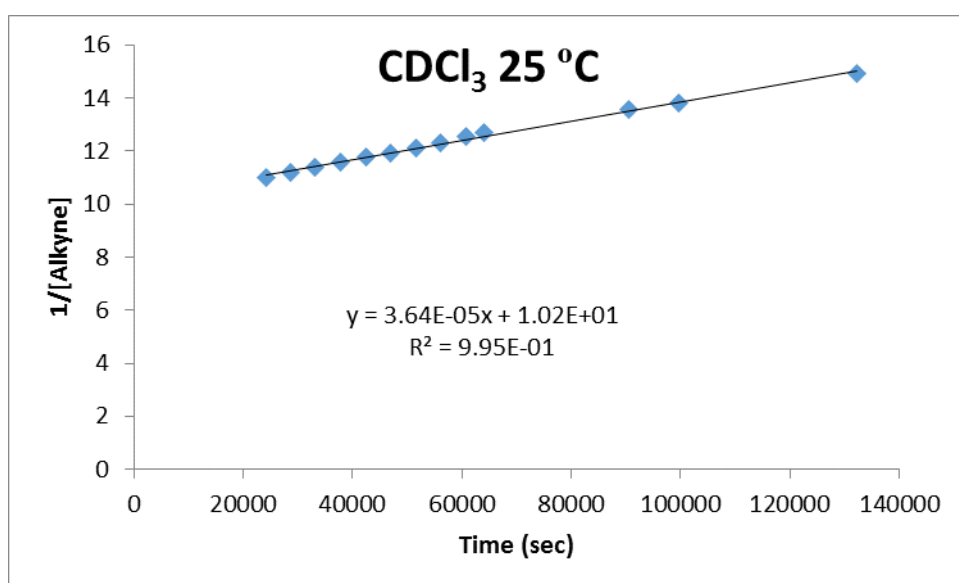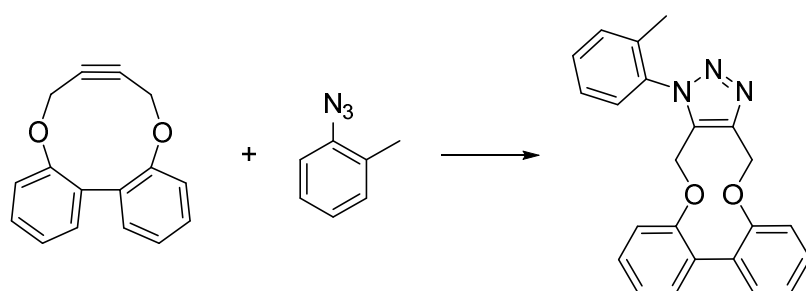

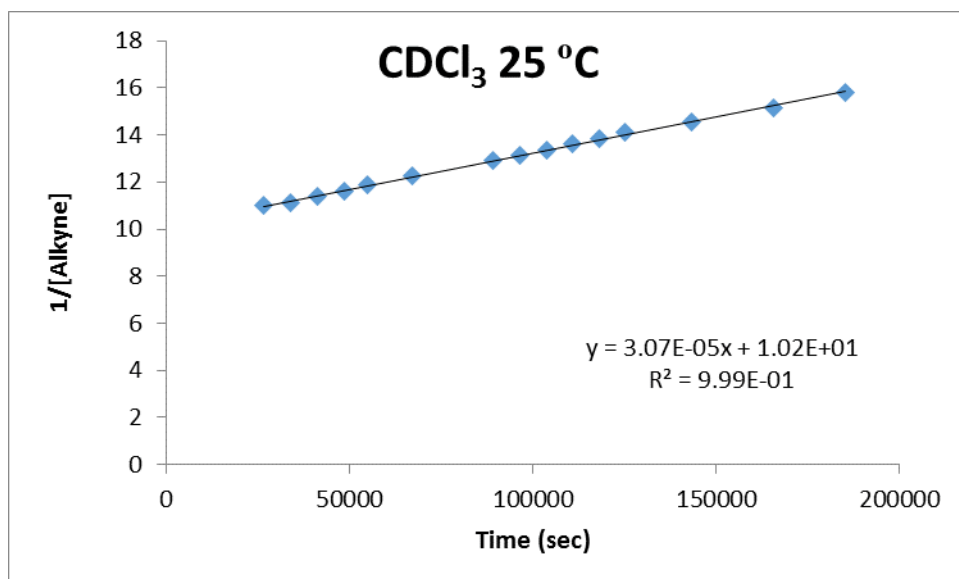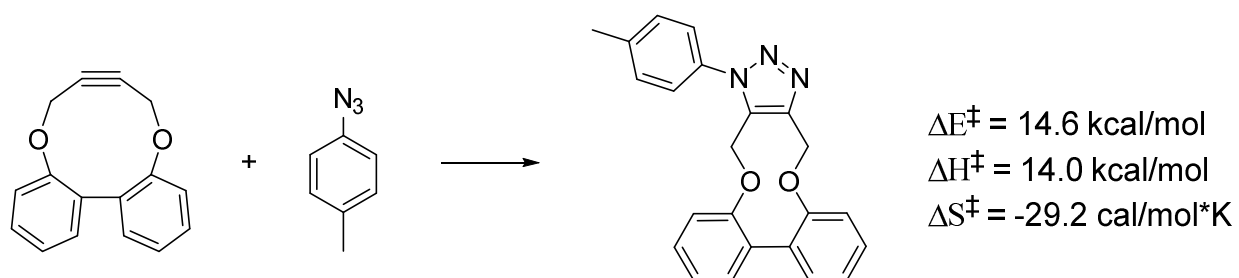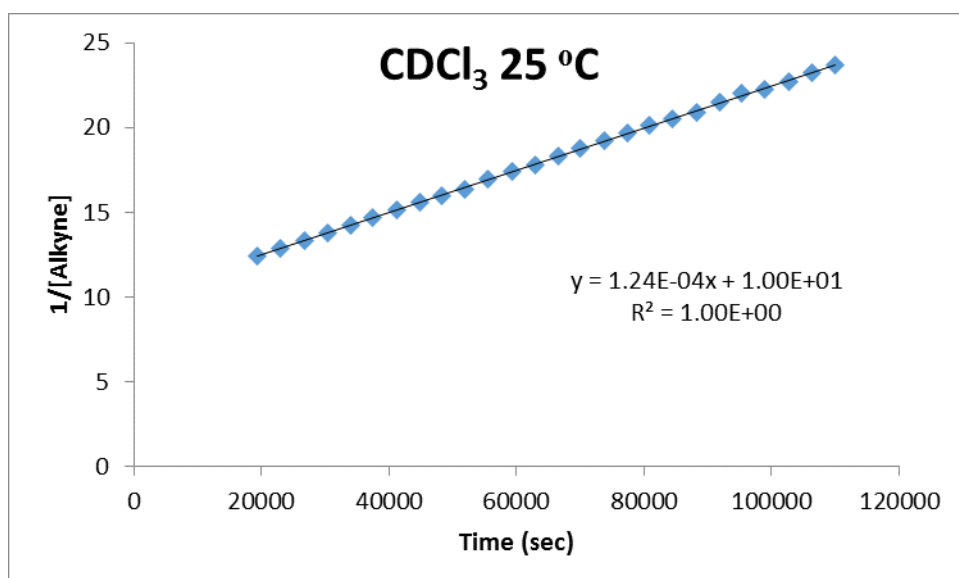



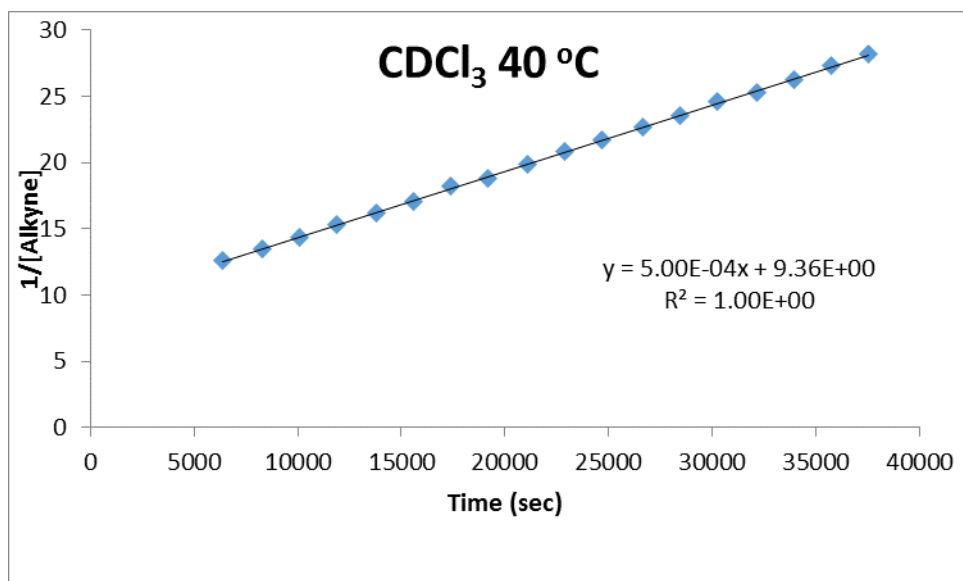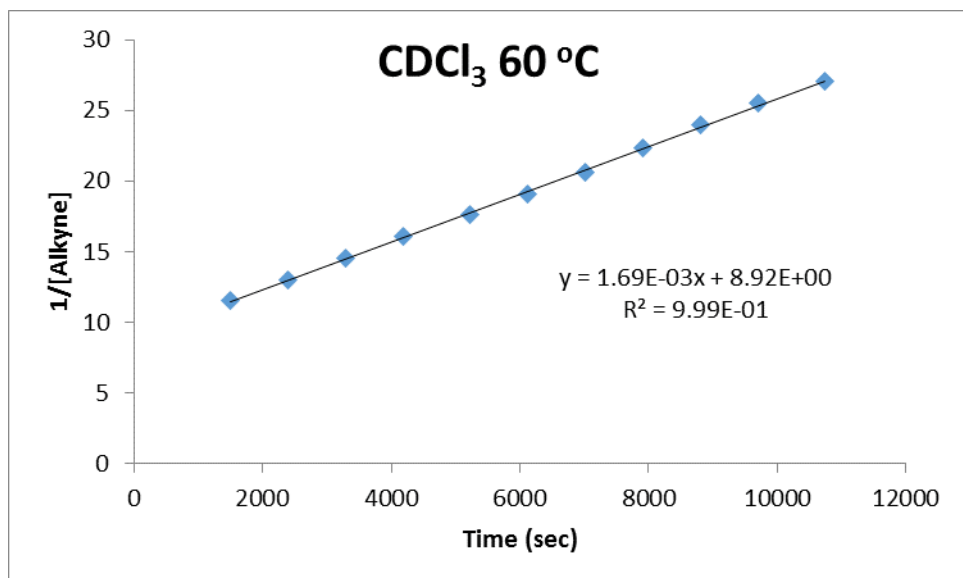

# Arrhenius and Eyring plots for reactions with benzyl azide and with p-tolylazide.

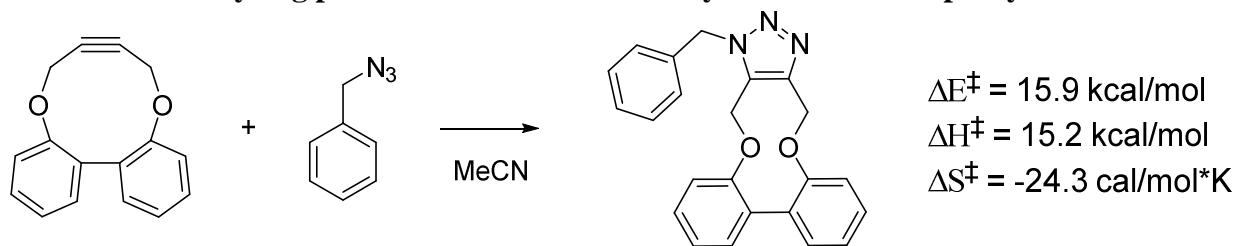

## Arrhenius plot

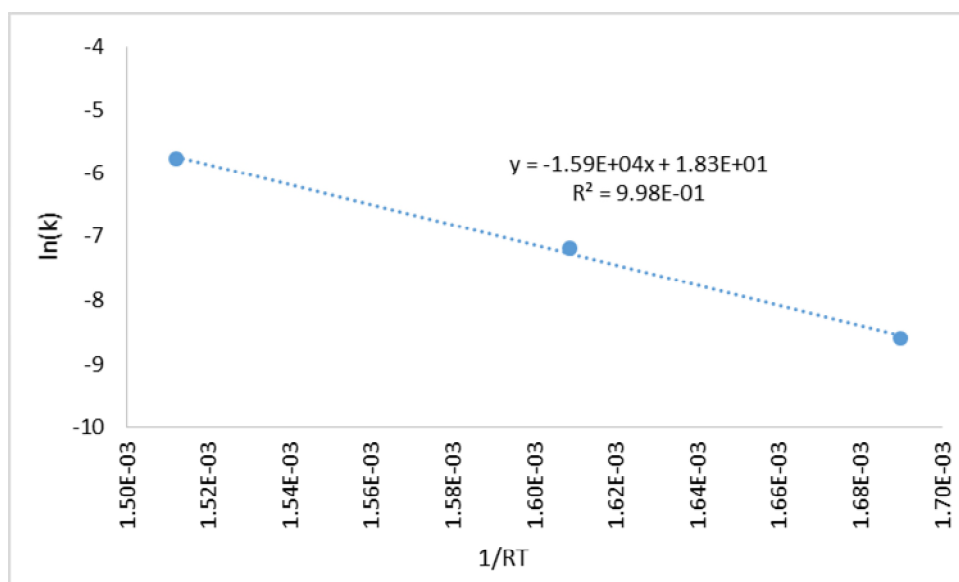

## Eyring plot

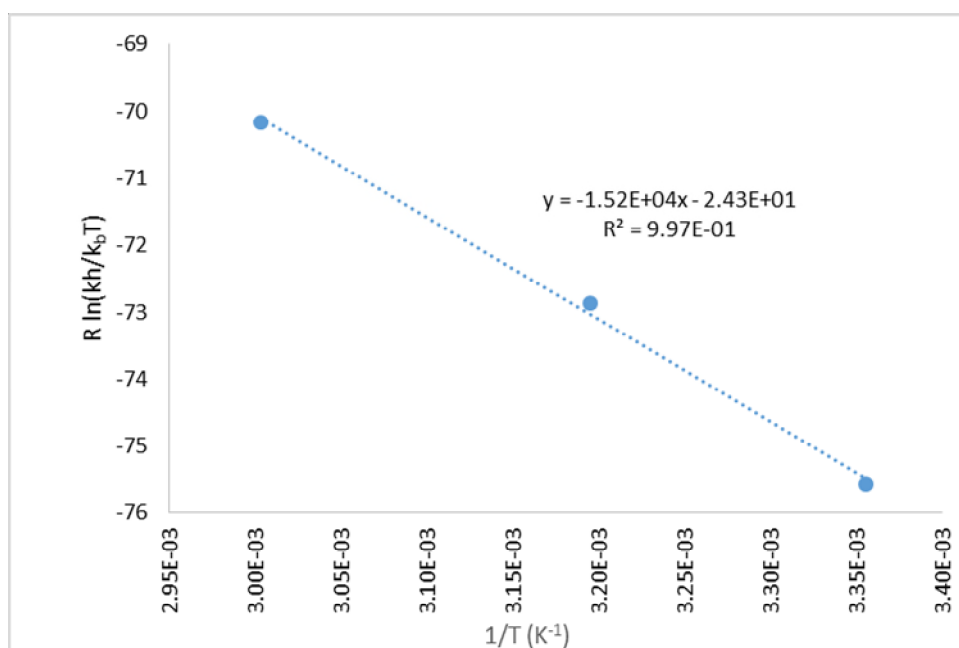

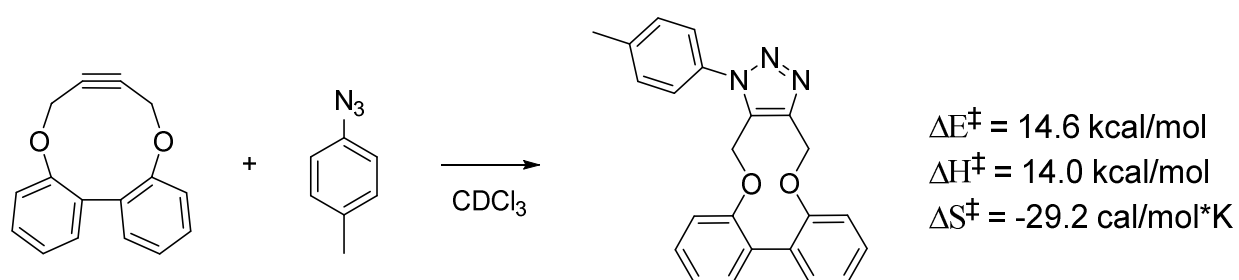

Arrhenius plot

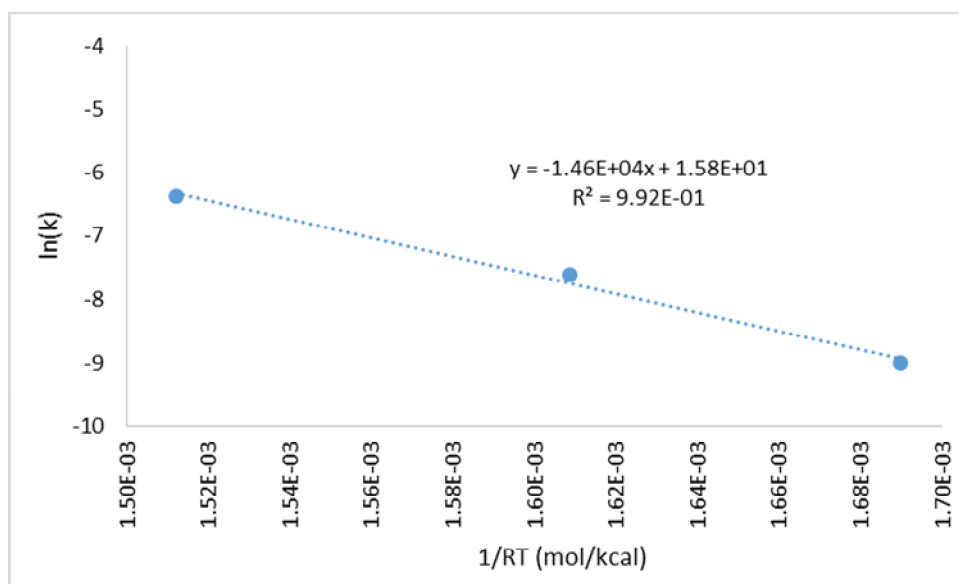

Eyring plot

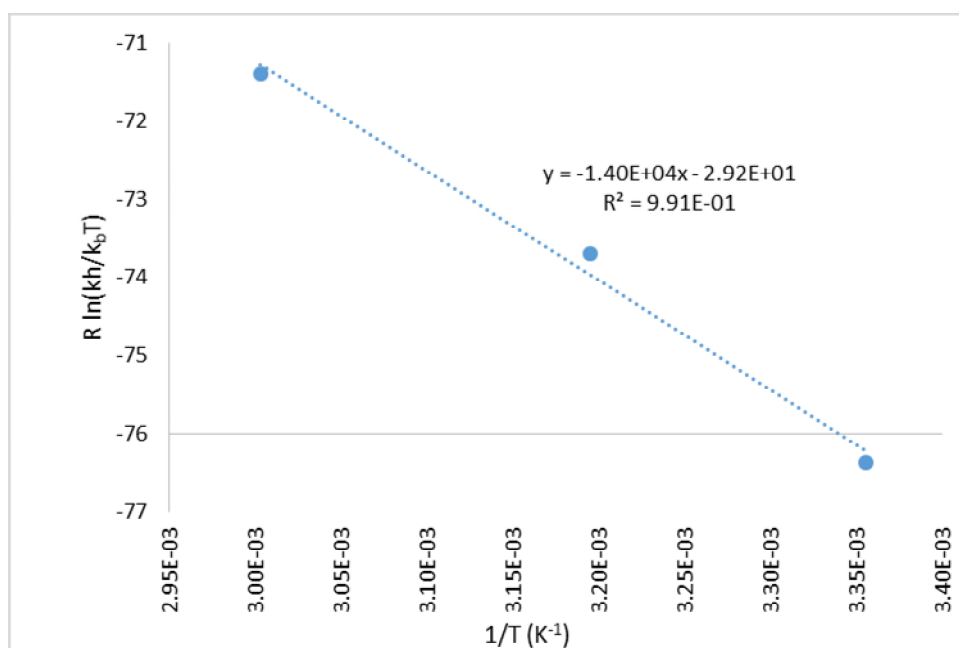

### Variable Temperature NMR studies:

The Gibbs free energy  $\Delta G^\ddagger$  required for atropisomer interconversion has been calculated by variable temperature NMR experiments to be 16.7 kcal mol<sup>-1</sup> (coalescence temperature for the OCH<sub>2</sub> peaks is 74 °C) for **10** and 16.3 kcal mol<sup>-1</sup> (coalescence temperature for the OCH<sub>2</sub> peaks is 56 °C) for **5a**.<sup>1</sup> In contrast, the Gibbs free energy  $\Delta G^\ddagger$  of atropisomer interconversion for **1** cannot be calculated by variable temperature NMR experiments since no broadening has been observed even at 100 °C, which was the highest temperature permitted by the instrument.

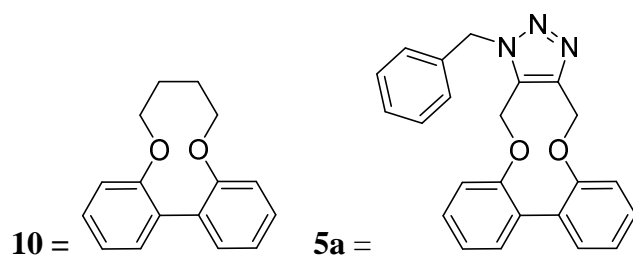

### Variable Temperature NMR spectra for 5a:

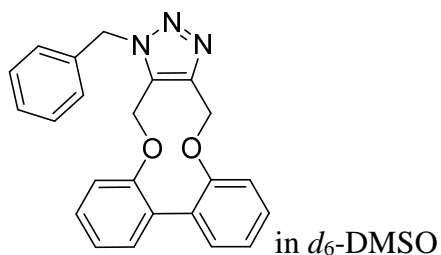

<sup>1</sup>  $\Delta G^\ddagger = 4.58T_c[9.97 + \log(T_c/\delta\nu)]$  where  $T_c$  = Temperature of coalescence and  $\delta\nu$  = the chemical shift difference in Hz between the two resonance at low temperature; J. A. Pople, W. G. Schneider, and H. J. Bernstein, *High Resolution Nuclear Magnetic Resonance*, McGraw-Hill Book Company, New York, 1959.

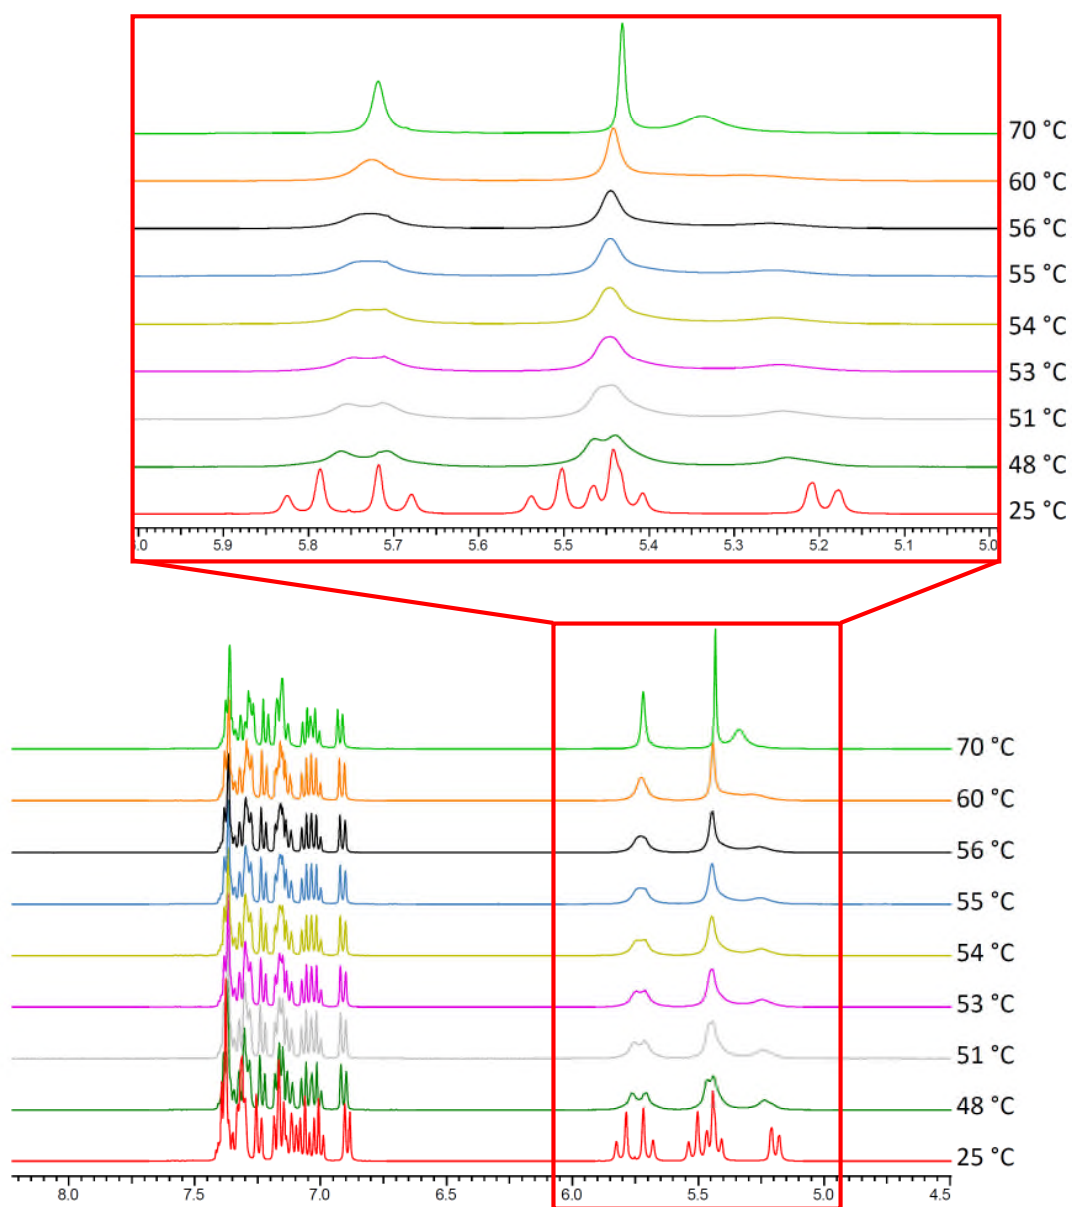

**Variable Temperature NMR spectra for 10:**

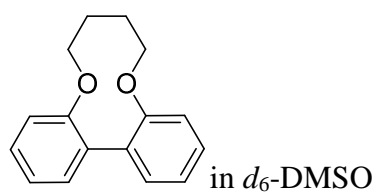

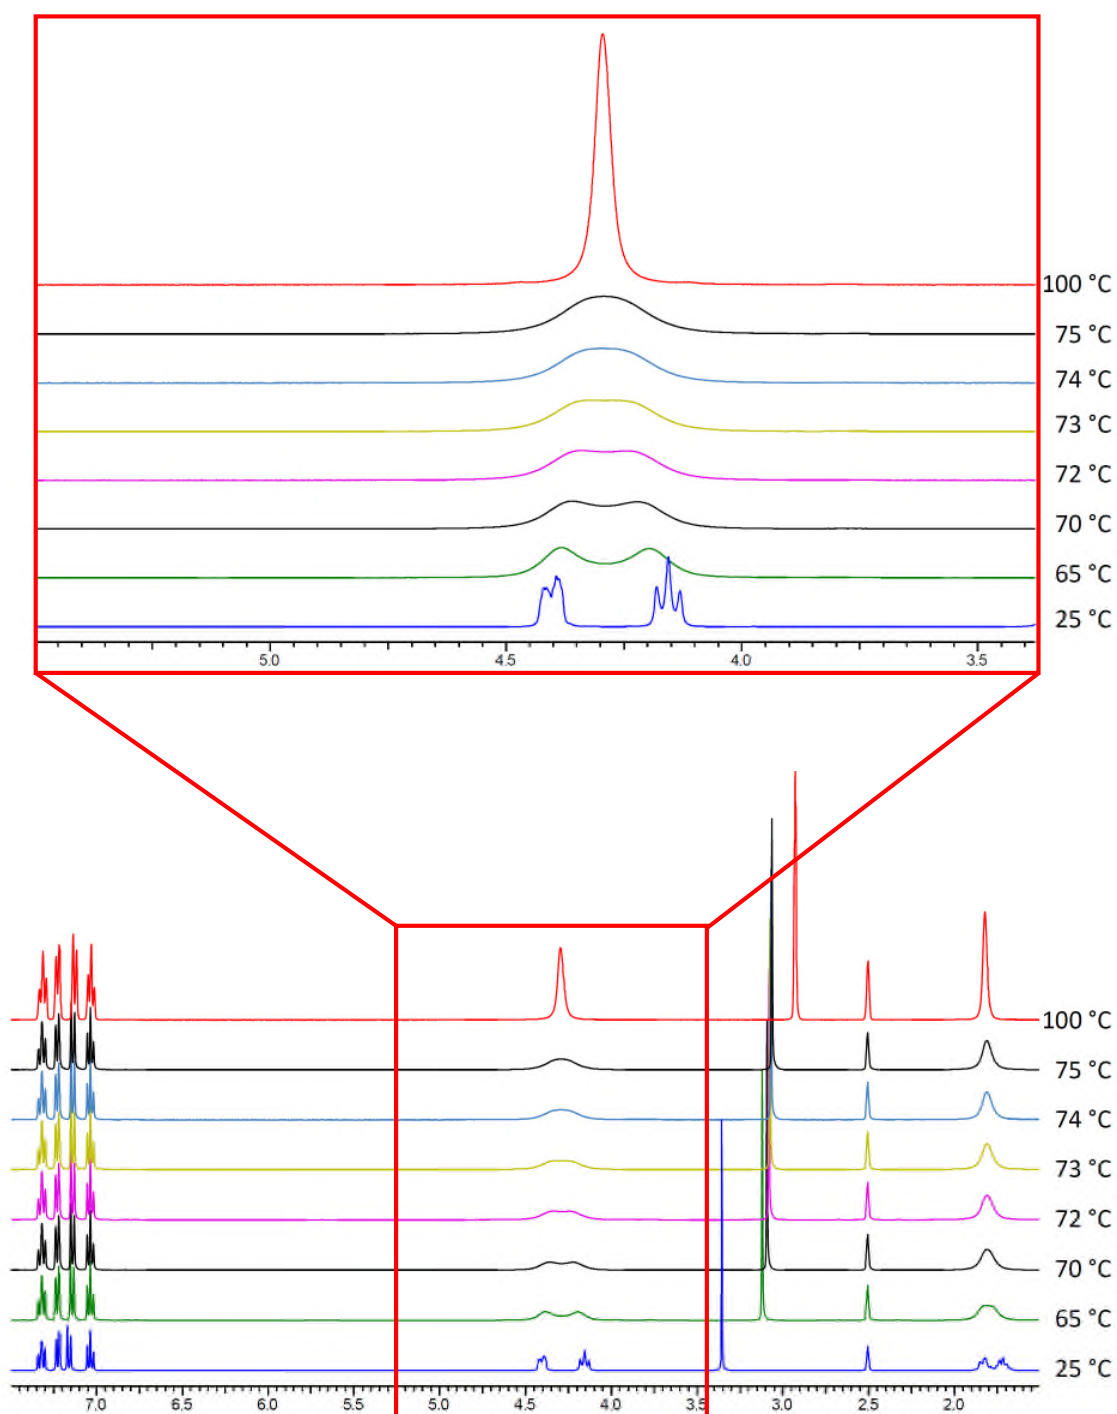

Note a VT-NMR study has been reported on an analogous bipyridyl compound;  
Durand, J.; Zangrando, E.; Carfagna, C.; Milani, B. *Dalton Trans.* **2008**, 2171-2182.

**Variable Temperature NMR spectra for 5a:**

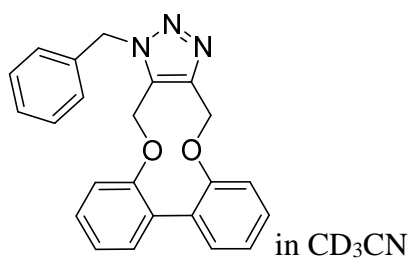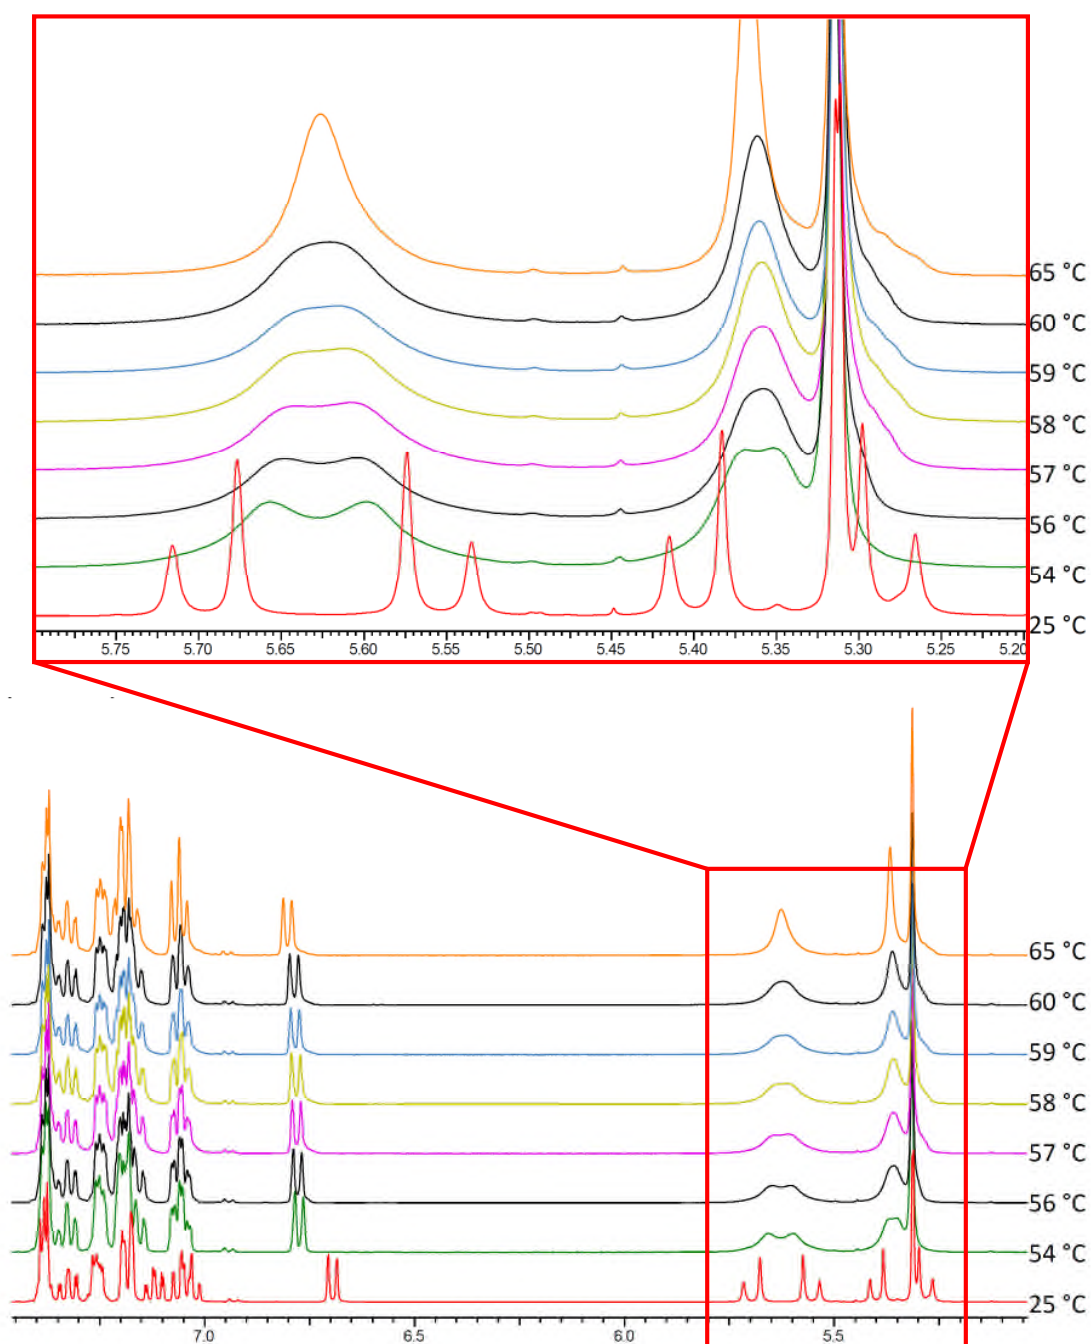

Supplement: c7ob00991g1.pdf [file c7ob00991g1.pdf]
